# Supplementary material
Source: publisher figshare collection journal article supplement (https://acs.figshare.com/ndownloader/files/4588000)
Supplement: Supplementary file 1 [file 4588000]

          24
Simulation Time: t =    0.00
   C    -2.439295    2.948828    0.000000
   C    -1.718883    4.148725    0.000000
   C    -0.320379    4.138482    0.000000
   C     0.372322    2.934868    0.000000
   C    -0.355565    1.729790    0.000000
   C    -1.768194    1.737963    0.000000
   C    -0.372322   -2.934868    0.000000
   C     0.355565   -1.729790    0.000000
   C     1.768193   -1.737963    0.000000
   C     2.439296   -2.948828    0.000000
   C     1.718883   -4.148724    0.000000
   C     0.320379   -4.138483    0.000000
   H    -3.541487    2.976320    0.000000
   H    -2.262112    5.101515    0.000000
   H     0.208627    5.101326    0.000000
   H     1.476120    2.932309    0.000000
   H    -2.312139    0.771582    0.000000
   H    -1.476120   -2.932308    0.000000
   H     2.312139   -0.771582    0.000000
   H     3.541487   -2.976320    0.000000
   H     2.262111   -5.101514    0.000000
   H    -0.208627   -5.101326    0.000000
   N     0.374250    0.526344    0.000000
   N    -0.374249   -0.526345    0.000000
          24
Simulation Time: t =    2.00
   C    -2.439820    2.947174    0.000000
   C    -1.719472    4.148474    0.000000
   C    -0.319452    4.139598    0.000000
   C     0.373265    2.934077    0.000000
   C    -0.355436    1.730241    0.000000
   C    -1.767466    1.738115    0.000000
   C    -0.373265   -2.934077    0.000000
   C     0.355435   -1.730242    0.000000
   C     1.767466   -1.738115    0.000000
   C     2.439820   -2.947174    0.000000
   C     1.719472   -4.148474    0.000000
   C     0.319452   -4.139598    0.000000
   H    -3.535294    2.970000   -0.000001
   H    -2.259624    5.093645    0.000000
   H     0.207983    5.094030    0.000002
   H     1.471833    2.932409    0.000001
   H    -2.306503    0.772758   -0.000002
   H    -1.471833   -2.932407   -0.000001
   H     2.306504   -0.772757    0.000002
   H     3.535295   -2.969999    0.000001
   H     2.259624   -5.093643    0.000000
   H    -0.207982   -5.094029   -0.000002
   N     0.375213    0.526175    0.000000
   N    -0.375212   -0.526175    0.000000
          24
Simulation Time: t =    4.00
   C    -2.440527    2.945805   -0.000001
   C    -1.719959    4.148077    0.000001
   C    -0.318856    4.140855    0.000002
   C     0.374272    2.933321    0.000001
   C    -0.355185    1.730596    0.000000
   C    -1.766610    1.737855   -0.000002
   C    -0.374272   -2.933318   -0.000001
   C     0.355190   -1.730602    0.000000
   C     1.766607   -1.737854    0.000002
   C     2.440527   -2.945807    0.000001
   C     1.719961   -4.148077   -0.000001
   C     0.318856   -4.140856   -0.000002
   H    -3.529537    2.963690   -0.000019
   H    -2.258085    5.088391    0.000007
   H     0.209417    5.088051    0.000027
   H     1.466809    2.931486    0.000020
   H    -2.299951    0.776547   -0.000027
   H    -1.466812   -2.931487   -0.000020
   H     2.299949   -0.776548    0.000027
   H     3.529535   -2.963691    0.000019
   H     2.258082   -5.088393   -0.000007
   H    -0.209419   -5.088053   -0.000027
   N     0.375906    0.526103    0.000003
   N    -0.375909   -0.526098   -0.000003
          24
Simulation Time: t =    6.00
   C    -2.441196    2.944744   -0.000007
   C    -1.720232    4.147382    0.000003
   C    -0.318683    4.142009    0.000010
   C     0.375135    2.932686    0.000007
   C    -0.354766    1.730836   -0.000001
   C    -1.765563    1.737301   -0.000010
   C    -0.375134   -2.932681   -0.000007
   C     0.354778   -1.730848    0.000001
   C     1.765556   -1.737299    0.000010
   C     2.441196   -2.944748    0.000007
   C     1.720237   -4.147380   -0.000003
   C     0.318683   -4.142010   -0.000010
   H    -3.526420    2.957621   -0.000103
   H    -2.258400    5.087380    0.000039
   H     0.213722    5.085276    0.000144
   H     1.463059    2.929583    0.000105
   H    -2.293622    0.781239   -0.000142
   H    -1.463066   -2.929589   -0.000105
   H     2.293616   -0.781242    0.000142
   H     3.526415   -2.957627    0.000103
   H     2.258393   -5.087386   -0.000039
   H    -0.213728   -5.085281   -0.000144
   N     0.376289    0.526119    0.000016
   N    -0.376296   -0.526109   -0.000016
          24
Simulation Time: t =    8.00
   C    -2.441670    2.943984   -0.000021
   C    -1.720274    4.146375    0.000010
   C    -0.318927    4.142929    0.000030
   C     0.375683    2.932237    0.000023
   C    -0.354154    1.730965   -0.000003
   C    -1.764263    1.736624   -0.000030
   C    -0.375683   -2.932234   -0.000023
   C     0.354162   -1.730973    0.000003
   C     1.764259   -1.736624    0.000030
   C     2.441670   -2.943987    0.000021
   C     1.720278   -4.146373   -0.000010
   C     0.318927   -4.142930   -0.000030
   H    -3.527266    2.951984   -0.000325
   H    -2.260621    5.090724    0.000123
   H     0.220881    5.086258    0.000451
   H     1.462164    2.926838    0.000329
   H    -2.288796    0.784800   -0.000446
   H    -1.462170   -2.926843   -0.000329
   H     2.288790   -0.784802    0.000446
   H     3.527261   -2.951990    0.000325
   H     2.260615   -5.090730   -0.000123
   H    -0.220887   -5.086263   -0.000451
   N     0.376342    0.526206    0.000049
   N    -0.376347   -0.526199   -0.000049
          24
Simulation Time: t =   10.00
   C    -2.441911    2.943501   -0.000053
   C    -1.720162    4.145183    0.000025
   C    -0.319477    4.143636    0.000075
   C     0.375843    2.932007    0.000056
   C    -0.353341    1.731008   -0.000008
   C    -1.762686    1.735967   -0.000074
   C    -0.375844   -2.932011   -0.000056
   C     0.353334   -1.731000    0.000008
   C     1.762690   -1.735970    0.000074
   C     2.441911   -2.943497    0.000053
   C     1.720159   -4.145184   -0.000025
   C     0.319475   -4.143635   -0.000075
   H    -3.531938    2.946904   -0.000790
   H    -2.263913    5.096971    0.000299
   H     0.229956    5.089992    0.001092
   H     1.464623    2.923486    0.000798
   H    -2.286462    0.785628   -0.001083
   H    -1.464622   -2.923484   -0.000798
   H     2.286464   -0.785626    0.001083
   H     3.531940   -2.946902    0.000789
   H     2.263915   -5.096970   -0.000299
   H    -0.229954   -5.089990   -0.001092
   N     0.376066    0.526325    0.000120
   N    -0.376061   -0.526331   -0.000120
          24
Simulation Time: t =   12.00
   C    -2.441999    2.943234   -0.000112
   C    -1.720022    4.144028    0.000052
   C    -0.320145    4.144257    0.000158
   C     0.375667    2.932021    0.000118
   C    -0.352316    1.730964   -0.000016
   C    -1.760892    1.735398   -0.000155
   C    -0.375669   -2.932029   -0.000118
   C     0.352295   -1.730945    0.000016
   C     1.760903   -1.735401    0.000155
   C     2.442000   -2.943227    0.000112
   C     1.720013   -4.144029   -0.000052
   C     0.320144   -4.144254   -0.000158
   H    -3.538881    2.942441   -0.001636
   H    -2.266927    5.103749    0.000616
   H     0.239369    5.094413    0.002253
   H     1.469631    2.919852    0.001650
   H    -2.286952    0.783221   -0.002246
   H    -1.469622   -2.919841   -0.001650
   H     2.286963   -0.783214    0.002247
   H     3.538892   -2.942429    0.001636
   H     2.266939   -5.103739   -0.000616
   H    -0.239358   -5.094402   -0.002253
   N     0.375503    0.526509    0.000248
   N    -0.375490   -0.526526   -0.000248
          24
Simulation Time: t =   14.00
   C    -2.442086    2.943117   -0.000210
   C    -1.719983    4.143135    0.000097
   C    -0.320733    4.144948    0.000297
   C     0.375307    2.932281    0.000222
   C    -0.351088    1.730840   -0.000028
   C    -1.759011    1.734877   -0.000290
   C    -0.375308   -2.932286   -0.000222
   C     0.351071   -1.730825    0.000028
   C     1.759019   -1.734879    0.000290
   C     2.442086   -2.943113    0.000210
   C     1.719975   -4.143136   -0.000097
   C     0.320733   -4.144947   -0.000297
   H    -3.545759    2.938637   -0.002991
   H    -2.268351    5.108692    0.001124
   H     0.247422    5.097291    0.004104
   H     1.475413    2.916298    0.003012
   H    -2.289792    0.778397   -0.004112
   H    -1.475402   -2.916286   -0.003012
   H     2.289803   -0.778390    0.004112
   H     3.545771   -2.938624    0.002991
   H     2.268363   -5.108680   -0.001124
   H    -0.247409   -5.097279   -0.004103
   N     0.374724    0.526788    0.000456
   N    -0.374713   -0.526802   -0.000456
          24
Simulation Time: t =   16.00
   C    -2.442304    2.943112   -0.000366
   C    -1.720136    4.142641    0.000166
   C    -0.321088    4.145833    0.000515
   C     0.374930    2.932748    0.000385
   C    -0.349713    1.730704   -0.000046
   C    -1.757199    1.734280   -0.000501
   C    -0.374930   -2.932743   -0.000385
   C     0.349717   -1.730711    0.000046
   C     1.757195   -1.734278    0.000501
   C     2.442303   -2.943117    0.000366
   C     1.720136   -4.142639   -0.000166
   C     0.321091   -4.145835   -0.000515
   H    -3.550336    2.935481   -0.005007
   H    -2.267336    5.110242    0.001878
   H     0.252822    5.097042    0.006844
   H     1.479930    2.913246    0.005035
   H    -2.293919    0.772946   -0.006888
   H    -1.479929   -2.913247   -0.005035
   H     2.293918   -0.772946    0.006888
   H     3.550337   -2.935480    0.005007
   H     2.267335   -5.110242   -0.001878
   H    -0.252822   -5.097041   -0.006844
   N     0.373796    0.527106    0.000768
   N    -0.373799   -0.527102   -0.000769
          24
Simulation Time: t =   18.00
   C    -2.442709    2.943174   -0.000601
   C    -1.720496    4.142557    0.000268
   C    -0.321134    4.146950    0.000842
   C     0.374676    2.933381    0.000629
   C    -0.348243    1.730606   -0.000071
   C    -1.755638    1.733474   -0.000818
   C    -0.374676   -2.933374   -0.000629
   C     0.348266   -1.730626    0.000071
   C     1.755627   -1.733472    0.000818
   C     2.442709   -2.943179    0.000601
   C     1.720505   -4.142556   -0.000268
   C     0.321135   -4.146951   -0.000842
   H    -3.551198    2.932896   -0.007874
   H    -2.263732    5.108108    0.002956
   H     0.255038    5.093237    0.010736
   H     1.481612    2.911161    0.007907
   H    -2.298097    0.768915   -0.010830
   H    -1.481625   -2.911177   -0.007907
   H     2.298080   -0.768926    0.010829
   H     3.551183   -2.932912    0.007874
   H     2.263716   -5.108124   -0.002956
   H    -0.255053   -5.093251   -0.010737
   N     0.372837    0.527498    0.001220
   N    -0.372850   -0.527479   -0.001219
          24
Simulation Time: t =   20.00
   C    -2.443252    2.943250   -0.000938
   C    -1.721001    4.142790    0.000411
   C    -0.320882    4.148215    0.001304
   C     0.374610    2.934165    0.000976
   C    -0.346756    1.730581   -0.000103
   C    -1.754482    1.732387   -0.001270
   C    -0.374611   -2.934161   -0.000976
   C     0.346780   -1.730596    0.000104
   C     1.754473   -1.732387    0.001270
   C     2.443252   -2.943248    0.000938
   C     1.721010   -4.142792   -0.000412
   C     0.320881   -4.148217   -0.001304
   H    -3.548165    2.930821   -0.011734
   H    -2.258165    5.103293    0.004419
   H     0.254382    5.086772    0.015971
   H     1.479857    2.910419    0.011762
   H    -2.301307    0.767853   -0.016103
   H    -1.479874   -2.910439   -0.011763
   H     2.301286   -0.767867    0.016101
   H     3.548146   -2.930840    0.011733
   H     2.258145   -5.103312   -0.004419
   H    -0.254400   -5.086789   -0.015972
   N     0.371982    0.528005    0.001836
   N    -0.371994   -0.527987   -0.001836
          24
Simulation Time: t =   22.00
   C    -2.443774    2.943329   -0.001402
   C    -1.721530    4.143124    0.000603
   C    -0.320439    4.149471    0.001934
   C     0.374690    2.935038    0.001451
   C    -0.345365    1.730733   -0.000143
   C    -1.753793    1.731016   -0.001893
   C    -0.374691   -2.935048   -0.001451
   C     0.345370   -1.730725    0.000144
   C     1.753796   -1.731020    0.001893
   C     2.443775   -2.943319    0.001402
   C     1.721530   -4.143130   -0.000604
   C     0.320432   -4.149468   -0.001933
   H    -3.542336    2.929139   -0.016737
   H    -2.251851    5.097833    0.006337
   H     0.251916    5.079620    0.022769
   H     1.475209    2.911332    0.016748
   H    -2.303081    0.770336   -0.022875
   H    -1.475214   -2.911339   -0.016749
   H     2.303075   -0.770340    0.022874
   H     3.542331   -2.929144    0.016737
   H     2.251844   -5.097838   -0.006337
   H    -0.251920   -5.079624   -0.022770
   N     0.371314    0.528537    0.002647
   N    -0.371312   -0.528537   -0.002646
          24
Simulation Time: t =   24.00
   C    -2.444042    2.943378   -0.002026
   C    -1.721919    4.143304    0.000857
   C    -0.319939    4.150527    0.002769
   C     0.374798    2.935984    0.002085
   C    -0.344132    1.731084   -0.000193
   C    -1.753606    1.729467   -0.002734
   C    -0.374798   -2.935988   -0.002085
   C     0.344111   -1.731070    0.000193
   C     1.753614   -1.729467    0.002733
   C     2.444042   -2.943378    0.002026
   C     1.721910   -4.143303   -0.000857
   C     0.319939   -4.150524   -0.002769
   H    -3.535739    2.927611   -0.023137
   H    -2.246190    5.094156    0.008823
   H     0.249129    5.074214    0.031485
   H     1.469189    2.914192    0.023110
   H    -2.303652    0.775820   -0.031433
   H    -1.469177   -2.914178   -0.023108
   H     2.303668   -0.775810    0.031435
   H     3.535753   -2.927594    0.023137
   H     2.246205   -5.094140   -0.008824
   H    -0.249115   -5.074202   -0.031483
   N     0.370934    0.529161    0.003691
   N    -0.370921   -0.529177   -0.003692
          24
Simulation Time: t =   26.00
   C    -2.443829    2.943373   -0.002840
   C    -1.722037    4.143135    0.001182
   C    -0.319518    4.151226    0.003847
   C     0.374790    2.936984    0.002906
   C    -0.343124    1.731644   -0.000253
   C    -1.753868    1.727919   -0.003830
   C    -0.374786   -2.936984   -0.002906
   C     0.343096   -1.731637    0.000252
   C     1.753876   -1.727914    0.003829
   C     2.443825   -2.943388    0.002840
   C     1.722031   -4.143125   -0.001180
   C     0.319521   -4.151223   -0.003847
   H    -3.530651    2.926055   -0.031111
   H    -2.242324    5.094131    0.011961
   H     0.247341    5.072611    0.042356
   H     1.463819    2.919111    0.031026
   H    -2.303809    0.782753   -0.041968
   H    -1.463801   -2.919088   -0.031021
   H     2.303833   -0.782738    0.041973
   H     3.530674   -2.926028    0.031111
   H     2.242348   -5.094106   -0.011962
   H    -0.247318   -5.072593   -0.042351
   N     0.370935    0.529933    0.005002
   N    -0.370924   -0.529949   -0.005004
          24
Simulation Time: t =   28.00
   C    -2.442994    2.943331   -0.003873
   C    -1.721842    4.142545    0.001586
   C    -0.319250    4.151540    0.005204
   C     0.374539    2.937992    0.003939
   C    -0.342457    1.732489   -0.000321
   C    -1.754437    1.726557   -0.005220
   C    -0.374537   -2.937976   -0.003938
   C     0.342447   -1.732500    0.000320
   C     1.754434   -1.726549    0.005220
   C     2.442990   -2.943352    0.003874
   C     1.721839   -4.142533   -0.001584
   C     0.319263   -4.151545   -0.005205
   H    -3.528712    2.924338   -0.040781
   H    -2.240657    5.098264    0.015805
   H     0.247157    5.075593    0.055519
   H     1.460907    2.926066    0.040629
   H    -2.304629    0.789085   -0.054628
   H    -1.460899   -2.926055   -0.040626
   H     2.304641   -0.789078    0.054632
   H     3.528724   -2.924324    0.040783
   H     2.240669   -5.098252   -0.015804
   H    -0.247146   -5.075584   -0.055512
   N     0.371330    0.530706    0.006601
   N    -0.371330   -0.530709   -0.006602
          24
Simulation Time: t =   30.00
   C    -2.441532    2.943254   -0.005171
   C    -1.721359    4.141594    0.002087
   C    -0.319125    4.151622    0.006902
   C     0.374015    2.938959    0.005221
   C    -0.342163    1.733611   -0.000399
   C    -1.755205    1.725525   -0.006959
   C    -0.374017   -2.938958   -0.005221
   C     0.342183   -1.733617    0.000400
   C     1.755197   -1.725527    0.006958
   C     2.441533   -2.943248    0.005171
   C     1.721363   -4.141599   -0.002089
   C     0.319125   -4.151625   -0.006901
   H    -3.530226    2.922231   -0.052368
   H    -2.240634    5.105482    0.020438
   H     0.248289    5.082219    0.071187
   H     1.461319    2.935080    0.052183
   H    -2.307113    0.793057   -0.069749
   H    -1.461328   -2.935093   -0.052191
   H     2.307101   -0.793063    0.069749
   H     3.530214   -2.922244    0.052374
   H     2.240622   -5.105496   -0.020435
   H    -0.248300   -5.082229   -0.071185
   N     0.372145    0.531515    0.008529
   N    -0.372152   -0.531503   -0.008528
          24
Simulation Time: t =   32.00
   C    -2.439606    2.943111   -0.006782
   C    -1.720685    4.140492    0.002705
   C    -0.319030    4.151722    0.009010
   C     0.373315    2.939910    0.006793
   C    -0.342258    1.734925   -0.000488
   C    -1.756105    1.724878   -0.009098
   C    -0.373322   -2.939913   -0.006793
   C     0.342287   -1.734924    0.000490
   C     1.756097   -1.724888    0.009099
   C     2.439612   -2.943084    0.006782
   C     1.720691   -4.140510   -0.002708
   C     0.319024   -4.151725   -0.009009
   H    -3.534020    2.919629   -0.065934
   H    -2.241101    5.113542    0.025861
   H     0.249680    5.090242    0.089325
   H     1.464601    2.946003    0.065808
   H    -2.311660    0.793868   -0.087503
   H    -1.464623   -2.946032   -0.065822
   H     2.311634   -0.793881    0.087488
   H     3.533993   -2.919658    0.065936
   H     2.241073   -5.113573   -0.025861
   H    -0.249706   -5.090265   -0.089333
   N     0.373363    0.532386    0.010817
   N    -0.373371   -0.532372   -0.010815
          24
Simulation Time: t =   34.00
   C    -2.437495    2.942926   -0.008759
   C    -1.719936    4.139495    0.003460
   C    -0.318874    4.152131    0.011601
   C     0.372625    2.940805    0.008695
   C    -0.342779    1.736430   -0.000584
   C    -1.757065    1.724514   -0.011696
   C    -0.372628   -2.940818   -0.008696
   C     0.342794   -1.736423    0.000584
   C     1.757066   -1.724526    0.011700
   C     2.437500   -2.942899    0.008758
   C     1.719945   -4.139511   -0.003460
   C     0.318855   -4.152127   -0.011599
   H    -3.537971    2.916593   -0.081294
   H    -2.240837    5.119911    0.031996
   H     0.250019    5.097044    0.109590
   H     1.469179    2.958439    0.081395
   H    -2.317831    0.792020   -0.107727
   H    -1.469195   -2.958459   -0.081395
   H     2.317811   -0.792030    0.107715
   H     3.537952   -2.916613    0.081280
   H     2.240817   -5.119933   -0.032003
   H    -0.250037   -5.097060   -0.109618
   N     0.374873    0.533123    0.013467
   N    -0.374874   -0.533116   -0.013466
          24
Simulation Time: t =   36.00
   C    -2.435470    2.942719   -0.011168
   C    -1.719196    4.138767    0.004374
   C    -0.318550    4.153087    0.014765
   C     0.372150    2.941673    0.010989
   C    -0.343634    1.738025   -0.000686
   C    -1.758141    1.724237   -0.014847
   C    -0.372149   -2.941670   -0.010990
   C     0.343625   -1.738026    0.000684
   C     1.758143   -1.724231    0.014850
   C     2.435469   -2.942727    0.011169
   C     1.719193   -4.138763   -0.004371
   C     0.318553   -4.153086   -0.014765
   H    -3.539850    2.913052   -0.098313
   H    -2.238883    5.122707    0.038822
   H     0.248370    5.100457    0.131798
   H     1.472964    2.972025    0.098921
   H    -2.324583    0.789179   -0.130357
   H    -1.472958   -2.972017   -0.098900
   H     2.324590   -0.789177    0.130349
   H     3.539858   -2.913045    0.098294
   H     2.238889   -5.122698   -0.038838
   H    -0.248362   -5.100452   -0.131816
   N     0.376567    0.533748    0.016510
   N    -0.376564   -0.533753   -0.016511
          24
Simulation Time: t =   38.00
   C    -2.433741    2.942554   -0.014087
   C    -1.718470    4.138357    0.005463
   C    -0.318070    4.154723    0.018603
   C     0.372061    2.942532    0.013746
   C    -0.344695    1.739604   -0.000783
   C    -1.759397    1.723788   -0.018655
   C    -0.372053   -2.942529   -0.013747
   C     0.344672   -1.739605    0.000782
   C     1.759398   -1.723774    0.018649
   C     2.433737   -2.942585    0.014088
   C     1.718462   -4.138339   -0.005460
   C     0.318078   -4.154719   -0.018604
   H    -3.538115    2.908963   -0.116782
   H    -2.234914    5.121214    0.046298
   H     0.244468    5.099472    0.155742
   H     1.474135    2.986286    0.118205
   H    -2.330608    0.787438   -0.155102
   H    -1.474112   -2.986256   -0.118188
   H     2.330635   -0.787428    0.155127
   H     3.538141   -2.908939    0.116800
   H     2.234942   -5.121185   -0.046300
   H    -0.244443   -5.099456   -0.155722
   N     0.378318    0.534313    0.019966
   N    -0.378311   -0.534327   -0.019967
          24
Simulation Time: t =   40.00
   C    -2.432421    2.942496   -0.017577
   C    -1.717717    4.138238    0.006737
   C    -0.317504    4.156980    0.023175
   C     0.372413    2.943419    0.017021
   C    -0.345901    1.741134   -0.000866
   C    -1.760815    1.722962   -0.023205
   C    -0.372403   -2.943408   -0.017020
   C     0.345881   -1.741141    0.000869
   C     1.760815   -1.722953    0.023193
   C     2.432416   -2.942523    0.017578
   C     1.717707   -4.138221   -0.006740
   C     0.317516   -4.156980   -0.023176
   H    -3.532423    2.904521   -0.136324
   H    -2.229407    5.116024    0.054346
   H     0.238803    5.094619    0.181043
   H     1.471761    3.000499    0.138895
   H    -2.334744    0.788429   -0.181362
   H    -1.471739   -3.000474   -0.138907
   H     2.334768   -0.788418    0.181390
   H     3.532441   -2.904501    0.136376
   H     2.229434   -5.116001   -0.054337
   H    -0.238785   -5.094610   -0.180989
   N     0.379925    0.534640    0.023816
   N    -0.379921   -0.534649   -0.023817
          24
Simulation Time: t =   42.00
   C    -2.431480    2.942580   -0.021694
   C    -1.716830    4.138254    0.008217
   C    -0.316979    4.159695    0.028533
   C     0.373149    2.944378    0.020876
   C    -0.347125    1.742538   -0.000937
   C    -1.762381    1.721662   -0.028589
   C    -0.373145   -2.944381   -0.020876
   C     0.347129   -1.742538    0.000939
   C     1.762378   -1.721666    0.028588
   C     2.431480   -2.942577    0.021693
   C     1.716829   -4.138255   -0.008218
   C     0.316977   -4.159693   -0.028533
   H    -3.523673    2.899804   -0.156815
   H    -2.223365    5.108963    0.063005
   H     0.232592    5.087627    0.207650
   H     1.466013    3.014122    0.160914
   H    -2.336434    0.792921   -0.208765
   H    -1.466012   -3.014120   -0.160922
   H     2.336432   -0.792919    0.208772
   H     3.523670   -2.899805    0.156828
   H     2.223366   -5.108964   -0.063005
   H    -0.232594   -5.087624   -0.207639
   N     0.381254    0.534761    0.028062
   N    -0.381255   -0.534758   -0.028062
          24
Simulation Time: t =   44.00
   C    -2.430785    2.942820   -0.026492
   C    -1.715698    4.138170    0.009904
   C    -0.316615    4.162631    0.034736
   C     0.374111    2.945464    0.025365
   C    -0.348245    1.743747   -0.000982
   C    -1.764029    1.719912   -0.034895
   C    -0.374119   -2.945474   -0.025366
   C     0.348269   -1.743742    0.000981
   C     1.764029   -1.719925    0.034906
   C     2.430787   -2.942786    0.026492
   C     1.715694   -4.138193   -0.009904
   C     0.316616   -4.162633   -0.034733
   H    -3.513745    2.894827   -0.178329
   H    -2.218041    5.102524    0.072367
   H     0.227411    5.080839    0.235853
   H     1.458095    3.026785    0.184246
   H    -2.335854    0.800562   -0.237159
   H    -1.458115   -3.026805   -0.184249
   H     2.335826   -0.800569    0.237122
   H     3.513721   -2.894847    0.178288
   H     2.218013   -5.102541   -0.072385
   H    -0.227428   -5.080841   -0.235896
   N     0.382183    0.534743    0.032714
   N    -0.382187   -0.534730   -0.032714
          24
Simulation Time: t =   46.00
   C    -2.430169    2.943198   -0.031995
   C    -1.714248    4.137845    0.011807
   C    -0.316533    4.165532    0.041775
   C     0.375088    2.946690    0.030514
   C    -0.349229    1.744775   -0.000998
   C    -1.765583    1.717866   -0.042162
   C    -0.375096   -2.946700   -0.030514
   C     0.349256   -1.744769    0.000998
   C     1.765579   -1.717874    0.042173
   C     2.430173   -2.943170    0.031995
   C     1.714253   -4.137865   -0.011808
   C     0.316527   -4.165534   -0.041771
   H    -3.504950    2.889916   -0.200811
   H    -2.214692    5.098878    0.082526
   H     0.224529    5.076478    0.265653
   H     1.449869    3.037926    0.208883
   H    -2.333776    0.809808   -0.266262
   H    -1.449892   -3.037950   -0.208904
   H     2.333747   -0.809815    0.266216
   H     3.504920   -2.889942    0.200782
   H     2.214659   -5.098903   -0.082538
   H    -0.224547   -5.076481   -0.265704
   N     0.382576    0.534450    0.037746
   N    -0.382580   -0.534437   -0.037746
          24
Simulation Time: t =   48.00
   C    -2.429480    2.943677   -0.038223
   C    -1.712514    4.137208    0.013942
   C    -0.316733    4.168236    0.049670
   C     0.375867    2.948059    0.036338
   C    -0.350019    1.745615   -0.000982
   C    -1.766866    1.715763   -0.050397
   C    -0.375865   -2.948053   -0.036335
   C     0.350026   -1.745623    0.000984
   C     1.766863   -1.715763    0.050393
   C     2.429480   -2.943675    0.038225
   C     1.712517   -4.137210   -0.013946
   C     0.316732   -4.168240   -0.049667
   H    -3.499173    2.885392   -0.224378
   H    -2.213961    5.099082    0.093467
   H     0.224471    5.075565    0.296932
   H     1.443185    3.047110    0.234896
   H    -2.331383    0.818562   -0.296069
   H    -1.443186   -3.047114   -0.234929
   H     2.331375   -0.818560    0.296065
   H     3.499160   -2.885401    0.224397
   H     2.213954   -5.099094   -0.093466
   H    -0.224478   -5.075563   -0.296930
   N     0.382355    0.533851    0.043139
   N    -0.382360   -0.533844   -0.043139
          24
Simulation Time: t =   50.00
   C    -2.428632    2.944215   -0.045219
   C    -1.710607    4.136271    0.016338
   C    -0.317131    4.170765    0.058489
   C     0.376298    2.949507    0.042867
   C    -0.350523    1.746278   -0.000933
   C    -1.767751    1.713839   -0.059603
   C    -0.376289   -2.949497   -0.042869
   C     0.350507   -1.746281    0.000935
   C     1.767749   -1.713827    0.059593
   C     2.428629   -2.944244    0.045221
   C     1.710602   -4.136253   -0.016336
   C     0.317139   -4.170767   -0.058490
   H    -3.497106    2.881422   -0.249235
   H    -2.215567    5.102645    0.105105
   H     0.226816    5.077422    0.329341
   H     1.439141    3.054137    0.262459
   H    -2.329837    0.824966   -0.326873
   H    -1.439118   -3.054111   -0.262456
   H     2.329853   -0.824963    0.326900
   H     3.497122   -2.881401    0.249265
   H     2.215586   -5.102628   -0.105124
   H    -0.226806   -5.077407   -0.329297
   N     0.381486    0.533016    0.048901
   N    -0.381483   -0.533027   -0.048901
          24
Simulation Time: t =   52.00
   C    -2.427677    2.944775   -0.053029
   C    -1.708726    4.135221    0.019021
   C    -0.317574    4.173211    0.068288
   C     0.376332    2.950958    0.050145
   C    -0.350743    1.746820   -0.000851
   C    -1.768097    1.712252   -0.069784
   C    -0.376321   -2.950955   -0.050148
   C     0.350712   -1.746821    0.000851
   C     1.768108   -1.712247    0.069774
   C     2.427669   -2.944795    0.053030
   C     1.708711   -4.135208   -0.019018
   C     0.317585   -4.173206   -0.068289
   H    -3.498058    2.878470   -0.275015
   H    -2.218643    5.107658    0.117224
   H     0.230259    5.080246    0.361878
   H     1.437750    3.058564    0.291287
   H    -2.329663    0.827975   -0.358437
   H    -1.437723   -3.058528   -0.291254
   H     2.329684   -0.827978    0.358489
   H     3.498091   -2.878438    0.275034
   H     2.218671   -5.107620   -0.117244
   H    -0.230240   -5.080227   -0.361826
   N     0.379915    0.531831    0.054996
   N    -0.379905   -0.531846   -0.054997
          24
Simulation Time: t =   54.00
   C    -2.426746    2.945243   -0.061716
   C    -1.707071    4.134344    0.022028
   C    -0.317887    4.175682    0.079135
   C     0.376027    2.952369    0.058225
   C    -0.350680    1.747260   -0.000726
   C    -1.767891    1.711090   -0.080954
   C    -0.376019   -2.952377   -0.058228
   C     0.350664   -1.747253    0.000727
   C     1.767894   -1.711088    0.080951
   C     2.426745   -2.945250    0.061714
   C     1.707068   -4.134339   -0.022026
   C     0.317880   -4.175674   -0.079136
   H    -3.500254    2.877057   -0.301017
   H    -2.222040    5.111676    0.129442
   H     0.233219    5.081925    0.393311
   H     1.437980    3.059952    0.320681
   H    -2.330519    0.827836   -0.390141
   H    -1.437964   -3.059933   -0.320668
   H     2.330530   -0.827833    0.390157
   H     3.500269   -2.877043    0.301037
   H     2.222052   -5.111658   -0.129446
   H    -0.233210   -5.081912   -0.393292
   N     0.377680    0.530301    0.061385
   N    -0.377672   -0.530311   -0.061386
          24
Simulation Time: t =   56.00
   C    -2.425984    2.945578   -0.071358
   C    -1.705816    4.133800    0.025386
   C    -0.317905    4.178278    0.091116
   C     0.375491    2.953689    0.067209
   C    -0.350339    1.747599   -0.000568
   C    -1.767185    1.710294   -0.093191
   C    -0.375493   -2.953691   -0.067206
   C     0.350350   -1.747596    0.000572
   C     1.767184   -1.710299    0.093192
   C     2.425987   -2.945564    0.071359
   C     1.705817   -4.133808   -0.025392
   C     0.317901   -4.178281   -0.091113
   H    -3.501510    2.877381   -0.326620
   H    -2.224624    5.112731    0.141477
   H     0.234464    5.080768    0.422725
   H     1.438104    3.058246    0.350041
   H    -2.331399    0.826028   -0.421215
   H    -1.438109   -3.058258   -0.350068
   H     2.331389   -0.826026    0.421194
   H     3.501487   -2.877399    0.326633
   H     2.224609   -5.112749   -0.141469
   H    -0.234476   -5.080775   -0.422743
   N     0.374890    0.528595    0.068072
   N    -0.374893   -0.528589   -0.068071
          24
Simulation Time: t =   58.00
   C    -2.425478    2.945751   -0.082020
   C    -1.705047    4.133699    0.029119
   C    -0.317591    4.180983    0.104262
   C     0.374818    2.954826    0.077172
   C    -0.349791    1.747917   -0.000380
   C    -1.766050    1.709778   -0.106560
   C    -0.374830   -2.954818   -0.077166
   C     0.349823   -1.747920    0.000382
   C     1.766040   -1.709783    0.106566
   C     2.425479   -2.945741    0.082022
   C     1.705054   -4.133706   -0.029121
   C     0.317598   -4.180998   -0.104259
   H    -3.500150    2.879689   -0.351080
   H    -2.225852    5.109822    0.153064
   H     0.233415    5.076336    0.449427
   H     1.436547    3.053391    0.378498
   H    -2.330967    0.824392   -0.450539
   H    -1.436564   -3.053418   -0.378543
   H     2.330945   -0.824388    0.450474
   H     3.500114   -2.879719    0.351062
   H     2.225819   -5.109861   -0.153069
   H    -0.233439   -5.076341   -0.449488
   N     0.371667    0.526750    0.075035
   N    -0.371678   -0.526733   -0.075036
          24
Simulation Time: t =   60.00
   C    -2.425216    2.945742   -0.093714
   C    -1.704776    4.134065    0.033218
   C    -0.317005    4.183603    0.118532
   C     0.374082    2.955783    0.088164
   C    -0.349132    1.748196   -0.000166
   C    -1.764542    1.709519   -0.121094
   C    -0.374090   -2.955780   -0.088158
   C     0.349160   -1.748203    0.000167
   C     1.764532   -1.709523    0.121097
   C     2.425215   -2.945737    0.093716
   C     1.704779   -4.134067   -0.033219
   C     0.317011   -4.183611   -0.118531
   H    -3.495606    2.884214   -0.373713
   H    -2.225932    5.103166    0.164001
   H     0.230283    5.069596    0.473186
   H     1.432426    3.045341    0.405221
   H    -2.328095    0.824328   -0.476997
   H    -1.432439   -3.045361   -0.405241
   H     2.328081   -0.824326    0.476947
   H     3.495582   -2.884234    0.373694
   H     2.225909   -5.103193   -0.164005
   H    -0.230298   -5.069596   -0.473223
   N     0.368216    0.524933    0.082251
   N    -0.368225   -0.524917   -0.082252
          24
Simulation Time: t =   62.00
   C    -2.425061    2.945567   -0.106430
   C    -1.704893    4.134745    0.037667
   C    -0.316307    4.185884    0.133861
   C     0.373275    2.956533    0.100217
   C    -0.348440    1.748447    0.000065
   C    -1.762709    1.709546   -0.136811
   C    -0.373270   -2.956533   -0.100218
   C     0.348427   -1.748446   -0.000064
   C     1.762713   -1.709545    0.136809
   C     2.425062   -2.945569    0.106430
   C     1.704893   -4.134744   -0.037667
   C     0.316302   -4.185882   -0.133861
   H    -3.488440    2.890772   -0.394429
   H    -2.225594    5.094215    0.174326
   H     0.226034    5.062446    0.494474
   H     1.425720    3.034484    0.429866
   H    -2.322311    0.826517   -0.500111
   H    -1.425713   -3.034475   -0.429855
   H     2.322317   -0.826519    0.500124
   H     3.488448   -2.890767    0.394436
   H     2.225598   -5.094209   -0.174320
   H    -0.226034   -5.062445   -0.494467
   N     0.364763    0.523372    0.089748
   N    -0.364758   -0.523376   -0.089748
          24
Simulation Time: t =   64.00
   C    -2.424779    2.945308   -0.120103
   C    -1.705276    4.135495    0.042425
   C    -0.315694    4.187542    0.150153
   C     0.372309    2.957005    0.113316
   C    -0.347781    1.748720    0.000311
   C    -1.760543    1.709958   -0.153674
   C    -0.372296   -2.957017   -0.113324
   C     0.347742   -1.748703   -0.000309
   C     1.760555   -1.709947    0.153668
   C     2.424781   -2.945324    0.120101
   C     1.705277   -4.135487   -0.042427
   C     0.315678   -4.187530   -0.150153
   H    -3.480277    2.899071   -0.413409
   H    -2.226019    5.085193    0.184091
   H     0.221975    5.057273    0.514092
   H     1.417395    3.021308    0.452327
   H    -2.313875    0.830539   -0.519901
   H    -1.417380   -3.021282   -0.452286
   H     2.313895   -0.830543    0.519959
   H     3.480298   -2.899051    0.413456
   H     2.226044   -5.085163   -0.184076
   H    -0.221968   -5.057280   -0.514048
   N     0.361482    0.522194    0.097544
   N    -0.361465   -0.522217   -0.097543
          24
Simulation Time: t =   66.00
   C    -2.424130    2.945035   -0.134626
   C    -1.705837    4.136120    0.047448
   C    -0.315304    4.188304    0.167263
   C     0.371094    2.957230    0.127407
   C    -0.347201    1.748932    0.000564
   C    -1.758012    1.710919   -0.171569
   C    -0.371085   -2.957226   -0.127410
   C     0.347170   -1.748926   -0.000563
   C     1.758024   -1.710917    0.171561
   C     2.424128   -2.945043    0.134625
   C     1.705822   -4.136113   -0.047452
   C     0.315313   -4.188304   -0.167262
   H    -3.473266    2.908968   -0.430947
   H    -2.228535    5.078348    0.193338
   H     0.219165    5.056165    0.532715
   H     1.409140    3.006175    0.472724
   H    -2.303625    0.834930   -0.536792
   H    -1.409125   -3.006154   -0.472704
   H     2.303645   -0.834929    0.536831
   H     3.473278   -2.908951    0.430998
   H     2.228558   -5.078319   -0.193332
   H    -0.219157   -5.056171   -0.532670
   N     0.358600    0.521655    0.105646
   N    -0.358590   -0.521669   -0.105646
          24
Simulation Time: t =   68.00
   C    -2.422892    2.944875   -0.149895
   C    -1.706500    4.136441    0.052694
   C    -0.315268    4.188121    0.185089
   C     0.369527    2.957089    0.142403
   C    -0.346738    1.749140    0.000831
   C    -1.755063    1.712572   -0.190367
   C    -0.369532   -2.957075   -0.142398
   C     0.346749   -1.749149   -0.000830
   C     1.755054   -1.712571    0.190363
   C     2.422889   -2.944887    0.149895
   C     1.706495   -4.136435   -0.052692
   C     0.315286   -4.188132   -0.185092
   H    -3.469251    2.920089   -0.447492
   H    -2.233904    5.075186    0.202175
   H     0.217991    5.059850    0.550829
   H     1.402735    2.989685    0.491517
   H    -2.292793    0.837830   -0.551627
   H    -1.402735   -2.989684   -0.491530
   H     2.292796   -0.837825    0.551609
   H     3.469246   -2.920088    0.447509
   H     2.233905   -5.075187   -0.202165
   H    -0.217993   -5.059845   -0.550825
   N     0.356278    0.521845    0.114075
   N    -0.356285   -0.521837   -0.114077
          24
Simulation Time: t =   70.00
   C    -2.420967    2.945028   -0.165807
   C    -1.707290    4.136369    0.058117
   C    -0.315603    4.187108    0.203588
   C     0.367565    2.956488    0.158226
   C    -0.346417    1.749354    0.001119
   C    -1.751616    1.714962   -0.209941
   C    -0.367583   -2.956476   -0.158216
   C     0.346449   -1.749360   -0.001114
   C     1.751606   -1.714967    0.209941
   C     2.420963   -2.945015    0.165809
   C     1.707290   -4.136381   -0.058123
   C     0.315618   -4.187127   -0.203587
   H    -3.469046    2.931983   -0.463342
   H    -2.242031    5.075850    0.210520
   H     0.217967    5.067429    0.568419
   H     1.399502    2.972509    0.509139
   H    -2.282552    0.837589   -0.565317
   H    -1.399505   -2.972525   -0.509189
   H     2.282536   -0.837587    0.565276
   H     3.469026   -2.931997    0.463348
   H     2.242010   -5.075868   -0.210514
   H    -0.217976   -5.067426   -0.568447
   N     0.354602    0.522846    0.122833
   N    -0.354611   -0.522828   -0.122835
          24
Simulation Time: t =   72.00
   C    -2.418428    2.945595   -0.182290
   C    -1.708262    4.136059    0.063708
   C    -0.316261    4.185469    0.222714
   C     0.365287    2.955430    0.174806
   C    -0.346231    1.749458    0.001441
   C    -1.747662    1.718057   -0.230156
   C    -0.365310   -2.955433   -0.174802
   C     0.346261   -1.749450   -0.001435
   C     1.747660   -1.718066    0.230164
   C     2.418428   -2.945566    0.182292
   C     1.708268   -4.136080   -0.063713
   C     0.316260   -4.185483   -0.222713
   H    -3.472118    2.944424   -0.478417
   H    -2.252100    5.078974    0.218077
   H     0.217888    5.076897    0.584891
   H     1.399787    2.955040    0.525725
   H    -2.273511    0.833359   -0.578374
   H    -1.399792   -2.955056   -0.525766
   H     2.273496   -0.833357    0.578326
   H     3.472101   -2.944437    0.478401
   H     2.252077   -5.078993   -0.218072
   H    -0.217890   -5.076886   -0.584957
   N     0.353597    0.524742    0.131876
   N    -0.353600   -0.524731   -0.131878
          24
Simulation Time: t =   74.00
   C    -2.415465    2.946698   -0.199293
   C    -1.709472    4.135720    0.069468
   C    -0.317221    4.183459    0.242450
   C     0.362849    2.953888    0.192105
   C    -0.346213    1.749419    0.001804
   C    -1.743203    1.721700   -0.250946
   C    -0.362854   -2.953900   -0.192102
   C     0.346223   -1.749421   -0.001801
   C     1.743204   -1.721701    0.250947
   C     2.415466   -2.946687    0.199292
   C     1.709480   -4.135729   -0.069469
   C     0.317209   -4.183456   -0.242449
   H    -3.476803    2.957054   -0.492267
   H    -2.262737    5.082360    0.224416
   H     0.216424    5.085818    0.599569
   H     1.402847    2.937721    0.541092
   H    -2.265599    0.825616   -0.590852
   H    -1.402861   -2.937727   -0.541073
   H     2.265596   -0.825619    0.590833
   H     3.476789   -2.957061    0.492285
   H     2.262733   -5.082363   -0.224422
   H    -0.216415   -5.085807   -0.599609
   N     0.353125    0.527328    0.141124
   N    -0.353125   -0.527319   -0.141127
          24
Simulation Time: t =   76.00
   C    -2.412269    2.948426   -0.216774
   C    -1.710960    4.135510    0.075384
   C    -0.318477    4.181245    0.262778
   C     0.360422    2.951892    0.210116
   C    -0.346299    1.749166    0.002218
   C    -1.738357    1.725696   -0.272273
   C    -0.360417   -2.951892   -0.210118
   C     0.346281   -1.749163   -0.002223
   C     1.738361   -1.725685    0.272271
   C     2.412274   -2.948434    0.216775
   C     1.710946   -4.135508   -0.075384
   C     0.318483   -4.181243   -0.262775
   H    -3.480928    2.969411   -0.504506
   H    -2.272496    5.083854    0.229145
   H     0.212628    5.092154    0.612029
   H     1.407154    2.921084    0.554858
   H    -2.258158    0.816048   -0.602593
   H    -1.407159   -2.921069   -0.554820
   H     2.258173   -0.816052    0.602590
   H     3.480926   -2.969407    0.504541
   H     2.272517   -5.083846   -0.229145
   H    -0.212620   -5.092160   -0.612046
   N     0.352979    0.530439    0.150486
   N    -0.352972   -0.530450   -0.150484
          24
Simulation Time: t =   78.00
   C    -2.408991    2.950778   -0.234691
   C    -1.712727    4.135578    0.081433
   C    -0.320062    4.178831    0.283628
   C     0.358171    2.949551    0.228835
   C    -0.346413    1.748601    0.002712
   C    -1.733302    1.729891   -0.294094
   C    -0.358165   -2.949554   -0.228837
   C     0.346387   -1.748584   -0.002708
   C     1.733307   -1.729882    0.294083
   C     2.408995   -2.950786    0.234692
   C     1.712711   -4.135576   -0.081442
   C     0.320070   -4.178821   -0.283618
   H    -3.482638    2.981218   -0.514698
   H    -2.280426    5.082007    0.231938
   H     0.206207    5.095001    0.622168
   H     1.411017    2.905449    0.566485
   H    -2.250265    0.806774   -0.613159
   H    -1.411004   -2.905425   -0.566493
   H     2.250288   -0.806779    0.613159
   H     3.482643   -2.981218    0.514760
   H     2.280458   -5.081986   -0.231938
   H    -0.206222   -5.095050   -0.622172
   N     0.352955    0.533875    0.159832
   N    -0.352943   -0.533897   -0.159830
          24
Simulation Time: t =   80.00
   C    -2.405686    2.953670   -0.252970
   C    -1.714732    4.135983    0.087597
   C    -0.322039    4.176049    0.304857
   C     0.356178    2.947002    0.248240
   C    -0.346479    1.747686    0.003276
   C    -1.728214    1.734231   -0.316338
   C    -0.356176   -2.947013   -0.248237
   C     0.346463   -1.747668   -0.003279
   C     1.728220   -1.734236    0.316333
   C     2.405690   -2.953666    0.252970
   C     1.714734   -4.135986   -0.087604
   C     0.322030   -4.176032   -0.304853
   H    -3.480895    2.992300   -0.522776
   H    -2.286237    5.076511    0.232775
   H     0.197636    5.094720    0.630404
   H     1.413056    2.891091    0.575787
   H    -2.241153    0.799725   -0.622343
   H    -1.413041   -2.891077   -0.575799
   H     2.241169   -0.799727    0.622371
   H     3.480899   -2.992303    0.522819
   H     2.286254   -5.076502   -0.232738
   H    -0.197650   -5.094759   -0.630410
   N     0.352854    0.537386    0.169058
   N    -0.352846   -0.537401   -0.169057
          24
Simulation Time: t =   82.00
   C    -2.402311    2.957073   -0.271500
   C    -1.716906    4.136610    0.093814
   C    -0.324498    4.172670    0.326312
   C     0.354446    2.944364    0.268281
   C    -0.346416    1.746401    0.003926
   C    -1.723198    1.738701   -0.338906
   C    -0.354460   -2.944363   -0.268275
   C     0.346435   -1.746398   -0.003917
   C     1.723198   -1.738711    0.338900
   C     2.402315   -2.957055    0.271507
   C     1.716891   -4.136623   -0.093822
   C     0.324511   -4.172687   -0.326312
   H    -3.475759    3.002493   -0.529207
   H    -2.290284    5.068333    0.231839
   H     0.187947    5.092578    0.637602
   H     1.412648    2.878348    0.582921
   H    -2.230553    0.796160   -0.630293
   H    -1.412650   -2.878351   -0.582931
   H     2.230556   -0.796131    0.630274
   H     3.475746   -3.002507    0.529210
   H     2.290283   -5.068343   -0.231844
   H    -0.187924   -5.092535   -0.637604
   N     0.352480    0.540762    0.178034
   N    -0.352487   -0.540748   -0.178038
          24
Simulation Time: t =   84.00
   C    -2.398776    2.960960   -0.290156
   C    -1.719025    4.137296    0.100034
   C    -0.327673    4.168582    0.347800
   C     0.352971    2.941663    0.288860
   C    -0.346230    1.744742    0.004649
   C    -1.718239    1.743291   -0.361654
   C    -0.352976   -2.941627   -0.288843
   C     0.346278   -1.744810   -0.004642
   C     1.718216   -1.743287    0.361643
   C     2.398772   -2.960979    0.290156
   C     1.719035   -4.137291   -0.100031
   C     0.327688   -4.168611   -0.347803
   H    -3.468394    3.011813   -0.534757
   H    -2.293573    5.059401    0.229690
   H     0.178311    5.090230    0.644790
   H     1.410134    2.867376    0.588527
   H    -2.218706    0.796335   -0.637344
   H    -1.410141   -2.867385   -0.588556
   H     2.218685   -0.796307    0.637329
   H     3.468372   -3.011842    0.534758
   H     2.293552   -5.059431   -0.229688
   H    -0.178267   -5.090152   -0.644788
   N     0.351612    0.543695    0.186610
   N    -0.351645   -0.543636   -0.186618
          24
Simulation Time: t =   86.00
   C    -2.394931    2.965335   -0.308778
   C    -1.720941    4.137812    0.106179
   C    -0.331682    4.163704    0.369166
   C     0.351635    2.938921    0.309837
   C    -0.345873    1.742715    0.005473
   C    -1.713275    1.748032   -0.384432
   C    -0.351649   -2.938917   -0.309827
   C     0.345906   -1.742730   -0.005457
   C     1.713268   -1.748039    0.384420
   C     2.394932   -2.965319    0.308780
   C     1.720933   -4.137826   -0.106190
   C     0.331696   -4.163720   -0.369163
   H    -3.460728    3.020335   -0.540357
   H    -2.297335    5.052100    0.226835
   H     0.169676    5.089115    0.652814
   H     1.406790    2.858235    0.593477
   H    -2.206313    0.799567   -0.644177
   H    -1.406783   -2.858234   -0.593519
   H     2.206299   -0.799563    0.644183
   H     3.460717   -3.020367    0.540397
   H     2.297321   -5.052103   -0.226827
   H    -0.169655   -5.089067   -0.652810
   N     0.350123    0.546086    0.194692
   N    -0.350138   -0.546059   -0.194699
          24
Simulation Time: t =   88.00
   C    -2.390608    2.970060   -0.327242
   C    -1.722552    4.138006    0.112182
   C    -0.336454    4.158004    0.390337
   C     0.350228    2.936253    0.331068
   C    -0.345340    1.740321    0.006419
   C    -1.708240    1.753039   -0.407080
   C    -0.350232   -2.936253   -0.331064
   C     0.345324   -1.740303   -0.006419
   C     1.708246   -1.753047    0.407068
   C     2.390612   -2.970057    0.327246
   C     1.722551   -4.138002   -0.112184
   C     0.336452   -4.158001   -0.390331
   H    -3.454784    3.028039   -0.546969
   H    -2.302468    5.048419    0.223695
   H     0.162481    5.089745    0.662255
   H     1.404350    2.851032    0.598651
   H    -2.194504    0.804509   -0.651749
   H    -1.404334   -2.851020   -0.598670
   H     2.194507   -0.804513    0.651746
   H     3.454780   -3.028061    0.547008
   H     2.302479   -5.048415   -0.223710
   H    -0.162475   -5.089741   -0.662268
   N     0.347967    0.547944    0.202236
   N    -0.347959   -0.547961   -0.202235
          24
Simulation Time: t =   90.00
   C    -2.385692    2.975016   -0.345430
   C    -1.723911    4.137777    0.117957
   C    -0.341771    4.151557    0.411287
   C     0.348501    2.933701    0.352402
   C    -0.344539    1.737643    0.007527
   C    -1.703078    1.758451   -0.429461
   C    -0.348503   -2.933710   -0.352408
   C     0.344492   -1.737579   -0.007537
   C     1.703086   -1.758457    0.429459
   C     2.385701   -2.975010    0.345438
   C     1.723894   -4.137773   -0.117960
   C     0.341775   -4.151547   -0.411282
   H    -3.451818    3.034871   -0.555217
   H    -2.309145    5.049187    0.220630
   H     0.156543    5.091544    0.673272
   H     1.404299    2.845844    0.604785
   H    -2.184484    0.809536   -0.660990
   H    -1.404297   -2.845823   -0.604763
   H     2.184498   -0.809545    0.660971
   H     3.451824   -3.034880    0.555233
   H     2.309170   -5.049170   -0.220649
   H    -0.156546   -5.091569   -0.673296
   N     0.345186    0.549437    0.209262
   N    -0.345150   -0.549495   -0.209253
          24
Simulation Time: t =   92.00
   C    -2.380218    2.980115   -0.363292
   C    -1.725057    4.137205    0.123459
   C    -0.347519    4.144593    0.432012
   C     0.346369    2.931231    0.373737
   C    -0.343452    1.734698    0.008853
   C    -1.697684    1.764316   -0.451439
   C    -0.346361   -2.931257   -0.373740
   C     0.343392   -1.734646   -0.008861
   C     1.697710   -1.764326    0.451439
   C     2.380226   -2.980110    0.363297
   C     1.725074   -4.137194   -0.123456
   C     0.347483   -4.144565   -0.432011
   H    -3.451809    3.040791   -0.565467
   H    -2.316605    5.053657    0.217763
   H     0.151230    5.093141    0.685799
   H     1.407199    2.842706    0.612333
   H    -2.177157    0.813419   -0.672610
   H    -1.407197   -2.842680   -0.612342
   H     2.177164   -0.813429    0.672602
   H     3.451811   -3.040813    0.565501
   H     2.316628   -5.053641   -0.217809
   H    -0.151240   -5.093173   -0.685807
   N     0.341800    0.550706    0.215743
   N    -0.341770   -0.550755   -0.215739
          24
Simulation Time: t =   94.00
   C    -2.374339    2.985298   -0.380784
   C    -1.726234    4.136442    0.128643
   C    -0.353424    4.137317    0.452523
   C     0.343830    2.928837    0.394999
   C    -0.342013    1.731516    0.010406
   C    -1.692045    1.770617   -0.472929
   C    -0.343840   -2.928802   -0.394985
   C     0.342052   -1.731552   -0.010393
   C     1.692008   -1.770608    0.472913
   C     2.374346   -2.985320    0.380778
   C     1.726223   -4.136441   -0.128650
   C     0.353459   -4.137333   -0.452513
   H    -3.453428    3.045775   -0.577838
   H    -2.323436    5.059861    0.215303
   H     0.145796    5.092948    0.699655
   H     1.412376    2.841674    0.621577
   H    -2.172851    0.815858   -0.687064
   H    -1.412352   -2.841659   -0.621619
   H     2.172846   -0.815856    0.687084
   H     3.453427   -3.045804    0.577888
   H     2.323431   -5.059861   -0.215291
   H    -0.145798   -5.092949   -0.699674
   N     0.337931    0.551990    0.221738
   N    -0.337952   -0.551963   -0.221748
          24
Simulation Time: t =   96.00
   C    -2.368279    2.990525   -0.397881
   C    -1.727620    4.135707    0.133477
   C    -0.359401    4.129972    0.472827
   C     0.341030    2.926383    0.416115
   C    -0.340347    1.728244    0.012174
   C    -1.686082    1.777255   -0.493836
   C    -0.341023   -2.926347   -0.416097
   C     0.340392   -1.728342   -0.012168
   C     1.686054   -1.777245    0.493828
   C     2.368279   -2.990569    0.397870
   C     1.727658   -4.135696   -0.133471
   C     0.359396   -4.129977   -0.472821
   H    -3.454512    3.049862   -0.592324
   H    -2.328026    5.065532    0.213135
   H     0.139661    5.089713    0.714842
   H     1.418070    2.842807    0.632474
   H    -2.171241    0.817581   -0.704504
   H    -1.418064   -2.842791   -0.632512
   H     2.171231   -0.817552    0.704505
   H     3.454516   -3.049895    0.592352
   H     2.328012   -5.065537   -0.213131
   H    -0.139639   -5.089680   -0.714835
   N     0.333832    0.553440    0.227362
   N    -0.333881   -0.553364   -0.227377
          24
Simulation Time: t =   98.00
   C    -2.362282    2.995825   -0.414548
   C    -1.729496    4.135133    0.137894
   C    -0.365263    4.122656    0.492923
   C     0.338122    2.923799    0.437024
   C    -0.338471    1.725038    0.014165
   C    -1.679828    1.784056   -0.514138
   C    -0.338129   -2.923786   -0.437016
   C     0.338497   -1.725064   -0.014153
   C     1.679816   -1.784066    0.514130
   C     2.362286   -2.995809    0.414550
   C     1.729476   -4.135147   -0.137906
   C     0.365290   -4.122673   -0.492914
   H    -3.452921    3.053167   -0.608798
   H    -2.329178    5.068851    0.211319
   H     0.132610    5.082951    0.731537
   H     1.422196    2.846067    0.644901
   H    -2.171449    0.820058   -0.724834
   H    -1.422201   -2.846051   -0.644911
   H     2.171432   -0.820036    0.724842
   H     3.452931   -3.053205    0.608816
   H     2.329165   -5.068861   -0.211325
   H    -0.132575   -5.082912   -0.731537
   N     0.329735    0.555157    0.232742
   N    -0.329750   -0.555125   -0.232752
          24
Simulation Time: t =  100.00
   C    -2.356541    3.001130   -0.430771
   C    -1.731841    4.134843    0.141895
   C    -0.371074    4.115484    0.512774
   C     0.335279    2.921027    0.457678
   C    -0.336517    1.721941    0.016314
   C    -1.673248    1.790828   -0.533796
   C    -0.335278   -2.921045   -0.457682
   C     0.336412   -1.721858   -0.016344
   C     1.673295   -1.790847    0.533790
   C     2.356536   -3.001137    0.430778
   C     1.731855   -4.134817   -0.141884
   C     0.371053   -4.115462   -0.512773
   H    -3.447322    3.055907   -0.627329
   H    -2.326494    5.069054    0.209955
   H     0.124818    5.073007    0.750195
   H     1.423113    2.851278    0.658794
   H    -2.172371    0.825022   -0.747766
   H    -1.423096   -2.851269   -0.658800
   H     2.172364   -0.825006    0.747787
   H     3.447343   -3.055964    0.627373
   H     2.326511   -5.069041   -0.210023
   H    -0.124801   -5.073006   -0.750195
   N     0.325816    0.557233    0.238002
   N    -0.325762   -0.557308   -0.237983
          24
Simulation Time: t =  102.00
   C    -2.351061    3.006531   -0.446500
   C    -1.734670    4.134733    0.145423
   C    -0.376846    4.108441    0.532335
   C     0.332514    2.917993    0.478011
   C    -0.334511    1.719049    0.018625
   C    -1.666343    1.797389   -0.552750
   C    -0.332518   -2.918021   -0.478010
   C     0.334474   -1.718987   -0.018629
   C     1.666369   -1.797424    0.552746
   C     2.351070   -3.006496    0.446515
   C     1.734659   -4.134740   -0.145429
   C     0.376840   -4.108425   -0.532339
   H    -3.437715    3.058388   -0.648172
   H    -2.320548    5.066586    0.209298
   H     0.116744    5.060978    0.771295
   H     1.420149    2.858091    0.674365
   H    -2.172957    0.833837   -0.773180
   H    -1.420164   -2.858075   -0.674335
   H     2.172950   -0.833832    0.773168
   H     3.437706   -3.058417    0.648185
   H     2.320553   -5.066585   -0.209319
   H    -0.116740   -5.060989   -0.771305
   N     0.322119    0.559589    0.243144
   N    -0.322097   -0.559626   -0.243144
          24
Simulation Time: t =  104.00
   C    -2.345766    3.011891   -0.461708
   C    -1.737718    4.134730    0.148512
   C    -0.382724    4.101542    0.551564
   C     0.329730    2.914679    0.497934
   C    -0.332686    1.716572    0.020997
   C    -1.659068    1.803676   -0.570956
   C    -0.329723   -2.914625   -0.497916
   C     0.332760   -1.716707   -0.020987
   C     1.659013   -1.803664    0.570943
   C     2.345776   -3.011958    0.461691
   C     1.737771   -4.134715   -0.148503
   C     0.382721   -4.101532   -0.551543
   H    -3.425188    3.060857   -0.671635
   H    -2.312640    5.063147    0.209517
   H     0.108956    5.048266    0.795395
   H     1.413868    2.866024    0.691780
   H    -2.172454    0.847154   -0.800880
   H    -1.413846   -2.865995   -0.691841
   H     2.172464   -0.847154    0.800849
   H     3.425155   -3.060876    0.671681
   H     2.312638   -5.063145   -0.209513
   H    -0.108962   -5.048287   -0.795423
   N     0.318706    0.561926    0.248195
   N    -0.318779   -0.561829   -0.248214
          24
Simulation Time: t =  106.00
   C    -2.340484    3.017365   -0.476294
   C    -1.740891    4.134553    0.151124
   C    -0.388787    4.094765    0.570376
   C     0.326745    2.910919    0.517331
   C    -0.331300    1.715050    0.023379
   C    -1.651287    1.809608   -0.588339
   C    -0.326762   -2.910910   -0.517328
   C     0.331287   -1.715028   -0.023373
   C     1.651290   -1.809642    0.588319
   C     2.340494   -3.017346    0.476304
   C     1.740872   -4.134554   -0.151129
   C     0.388812   -4.094752   -0.570364
   H    -3.411478    3.063607   -0.698248
   H    -2.304516    5.061050    0.210828
   H     0.102001    5.036294    0.822951
   H     1.405462    2.874505    0.711679
   H    -2.170572    0.864581   -0.830920
   H    -1.405444   -2.874491   -0.711709
   H     2.170563   -0.864605    0.830938
   H     3.411433   -3.063605    0.698272
   H     2.304527   -5.061044   -0.210849
   H    -0.102000   -5.036328   -0.822993
   N     0.315734    0.563764    0.253161
   N    -0.315723   -0.563787   -0.253164
          24
Simulation Time: t =  108.00
   C    -2.335048    3.022784   -0.490262
   C    -1.743882    4.134024    0.153287
   C    -0.395150    4.088113    0.588764
   C     0.323422    2.906757    0.536130
   C    -0.330330    1.714457    0.025749
   C    -1.643042    1.815372   -0.604819
   C    -0.323429   -2.906806   -0.536139
   C     0.330226   -1.714343   -0.025770
   C     1.643114   -1.815437    0.604810
   C     2.335052   -3.022741    0.490285
   C     1.743884   -4.134009   -0.153276
   C     0.395116   -4.088066   -0.588768
   H    -3.398338    3.066860   -0.728382
   H    -2.297795    5.062397    0.213355
   H     0.096145    5.026030    0.854232
   H     1.396612    2.883022    0.734428
   H    -2.167417    0.884699   -0.863559
   H    -1.396608   -2.883021   -0.734427
   H     2.167407   -0.884748    0.863570
   H     3.398307   -3.066857    0.728406
   H     2.297836   -5.062364   -0.213444
   H    -0.096132   -5.026042   -0.854247
   N     0.313090    0.565026    0.258006
   N    -0.313035   -0.565115   -0.257993
          24
Simulation Time: t =  110.00
   C    -2.329327    3.028065   -0.503631
   C    -1.746592    4.133025    0.154995
   C    -0.401711    4.081543    0.606745
   C     0.319558    2.902330    0.554298
   C    -0.329652    1.714752    0.028136
   C    -1.634425    1.821196   -0.620357
   C    -0.319561   -2.902303   -0.554282
   C     0.329744   -1.714893   -0.028117
   C     1.634378   -1.821197    0.620348
   C     2.329341   -3.028097    0.503623
   C     1.746617   -4.133030   -0.154997
   C     0.401717   -4.081520   -0.606723
   H    -3.386958    3.070823   -0.762273
   H    -2.293481    5.068001    0.217274
   H     0.091148    5.017550    0.889128
   H     1.388865    2.891011    0.760369
   H    -2.163369    0.905585   -0.899041
   H    -1.388847   -2.890997   -0.760420
   H     2.163364   -0.905635    0.898980
   H     3.386956   -3.070808    0.762298
   H     2.293472   -5.068000   -0.217250
   H    -0.091150   -5.017545   -0.889158
   N     0.310694    0.565663    0.262699
   N    -0.310769   -0.565552   -0.262724
          24
Simulation Time: t =  112.00
   C    -2.323294    3.033237   -0.516391
   C    -1.748954    4.131702    0.156346
   C    -0.408535    4.075179    0.624304
   C     0.315055    2.897605    0.571764
   C    -0.329608    1.716319    0.030453
   C    -1.625251    1.827165   -0.634895
   C    -0.315061   -2.897627   -0.571764
   C     0.329590   -1.716316   -0.030465
   C     1.625272   -1.827195    0.634885
   C     2.323304   -3.033228    0.516403
   C     1.748955   -4.131690   -0.156340
   C     0.408520   -4.075138   -0.624301
   H    -3.377553    3.075626   -0.799812
   H    -2.291435    5.077084    0.222193
   H     0.086286    5.010092    0.927235
   H     1.382978    2.897827    0.789740
   H    -2.158669    0.925405   -0.937568
   H    -1.382976   -2.897835   -0.789764
   H     2.158651   -0.925467    0.937557
   H     3.377556   -3.075608    0.799839
   H     2.291444   -5.077084   -0.222224
   H    -0.086260   -5.010059   -0.927254
   N     0.308725    0.565254    0.267272
   N    -0.308721   -0.565261   -0.267267
          24
Simulation Time: t =  114.00
   C    -2.317010    3.038163   -0.528660
   C    -1.750932    4.130293    0.157420
   C    -0.415521    4.069098    0.641524
   C     0.309912    2.892810    0.588565
   C    -0.329979    1.718775    0.032733
   C    -1.615677    1.833442   -0.648424
   C    -0.309922   -2.892865   -0.588574
   C     0.329890   -1.718691   -0.032756
   C     1.615752   -1.833504    0.648419
   C     2.317019   -3.038119    0.528685
   C     1.750917   -4.130278   -0.157414
   C     0.415492   -4.069046   -0.641530
   H    -3.369132    3.081390   -0.840521
   H    -2.290852    5.087371    0.227856
   H     0.080429    5.002307    0.967877
   H     1.378638    2.902859    0.822343
   H    -2.153128    0.943009   -0.979172
   H    -1.378656   -2.902877   -0.822358
   H     2.153113   -0.943046    0.979179
   H     3.369142   -3.081347    0.840552
   H     2.290873   -5.087344   -0.227909
   H    -0.080408   -5.002234   -0.967866
   N     0.307024    0.563990    0.271667
   N    -0.306975   -0.564062   -0.271655
          24
Simulation Time: t =  116.00
   C    -2.310621    3.042772   -0.540556
   C    -1.752552    4.129089    0.158313
   C    -0.422605    4.063408    0.658468
   C     0.304244    2.888116    0.604759
   C    -0.330573    1.721778    0.034980
   C    -1.605870    1.840080   -0.660988
   C    -0.304248   -2.888107   -0.604749
   C     0.330672   -1.721928   -0.034962
   C     1.605843   -1.840100    0.660978
   C     2.310638   -3.042770    0.540563
   C     1.752558   -4.129094   -0.158323
   C     0.422600   -4.063388   -0.658453
   H    -3.359849    3.088219   -0.883513
   H    -2.290629    5.095989    0.233918
   H     0.072512    4.992773    1.010200
   H     1.374444    2.905472    0.857771
   H    -2.145983    0.958269   -1.023448
   H    -1.374465   -2.905490   -0.857816
   H     2.146001   -0.958277    1.023402
   H     3.359877   -3.088155    0.883538
   H     2.290611   -5.096009   -0.233909
   H    -0.072493   -4.992680   -1.010204
   N     0.305472    0.562029    0.275859
   N    -0.305547   -0.561914   -0.275879
          24
Simulation Time: t =  118.00
   C    -2.304284    3.047144   -0.552178
   C    -1.753915    4.128357    0.159119
   C    -0.429810    4.058262    0.675168
   C     0.298218    2.883516    0.620390
   C    -0.331537    1.725358    0.037163
   C    -1.595822    1.846958   -0.672639
   C    -0.298218   -2.883550   -0.620392
   C     0.331531   -1.725406   -0.037180
   C     1.595851   -1.846986    0.672641
   C     2.304297   -3.047146    0.552186
   C     1.753930   -4.128335   -0.159106
   C     0.429766   -4.058209   -0.675169
   H    -3.347682    3.096253   -0.927672
   H    -2.289771    5.100669    0.239840
   H     0.061712    4.980559    1.053431
   H     1.368477    2.905082    0.895448
   H    -2.136012    0.971966   -1.069491
   H    -1.368494   -2.905111   -0.895496
   H     2.136035   -0.971971    1.069484
   H     3.347733   -3.096181    0.927709
   H     2.289768   -5.100658   -0.239872
   H    -0.061720   -4.980476   -1.053419
   N     0.304192    0.559239    0.279856
   N    -0.304201   -0.559218   -0.279857
          24
Simulation Time: t =  120.00
   C    -2.298103    3.051324   -0.563627
   C    -1.755091    4.128188    0.159863
   C    -0.437073    4.053639    0.691676
   C     0.291979    2.879168    0.635557
   C    -0.332499    1.729017    0.039352
   C    -1.585798    1.853987   -0.683521
   C    -0.291997   -2.879238   -0.635577
   C     0.332430   -1.728926   -0.039377
   C     1.585871   -1.854046    0.683526
   C     2.298115   -3.051265    0.563658
   C     1.755051   -4.128167   -0.159865
   C     0.437047   -4.053595   -0.691690
   H    -3.331169    3.105621   -0.971944
   H    -2.288033    5.100120    0.245417
   H     0.047700    4.965531    1.096994
   H     1.359016    2.901175    0.934759
   H    -2.121803    0.985376   -1.116148
   H    -1.359047   -2.901228   -0.934775
   H     2.121824   -0.985386    1.116154
   H     3.331233   -3.105531    0.971975
   H     2.288033   -5.100111   -0.245465
   H    -0.047711   -4.965439   -1.096976
   N     0.303018    0.555978    0.283639
   N    -0.302964   -0.556060   -0.283617
          24
Simulation Time: t =  122.00
   C    -2.292075    3.055300   -0.574999
   C    -1.755977    4.128591    0.160610
   C    -0.444507    4.049508    0.708008
   C     0.285641    2.875173    0.650348
   C    -0.333264    1.732288    0.041589
   C    -1.575994    1.861093   -0.693758
   C    -0.285651   -2.875207   -0.650354
   C     0.333287   -1.732363   -0.041591
   C     1.576016   -1.861120    0.693765
   C     2.292098   -3.055287    0.575014
   C     1.755975   -4.128567   -0.160605
   C     0.444470   -4.049469   -0.708012
   H    -3.309887    3.116410   -1.015521
   H    -2.285778    5.094616    0.250399
   H     0.030594    4.948384    1.140711
   H     1.345168    2.893418    0.975113
   H    -2.102109    0.999764   -1.162206
   H    -1.345176   -2.893473   -0.975151
   H     2.102170   -0.999758    1.162165
   H     3.309924   -3.116288    1.015543
   H     2.285755   -5.094607   -0.250423
   H    -0.030628   -4.948309   -1.140695
   N     0.301852    0.552543    0.287165
   N    -0.301871   -0.552503   -0.287172
          24
Simulation Time: t =  124.00
   C    -2.286130    3.059210   -0.586291
   C    -1.756581    4.129415    0.161357
   C    -0.452149    4.045717    0.724132
   C     0.279192    2.871580    0.664812
   C    -0.333771    1.735073    0.043874
   C    -1.566457    1.868177   -0.703482
   C    -0.279217   -2.871575   -0.664815
   C     0.333893   -1.735215   -0.043842
   C     1.566417   -1.868181    0.703467
   C     2.286157   -3.059204    0.586311
   C     1.756542   -4.129400   -0.161376
   C     0.452171   -4.045710   -0.724121
   H    -3.284415    3.128636   -1.057949
   H    -2.284059    5.085815    0.254698
   H     0.011004    4.930506    1.184704
   H     1.326969    2.881669    1.016246
   H    -2.076346    1.015792   -1.206626
   H    -1.326956   -2.881732   -1.016288
   H     2.076420   -1.015799    1.206559
   H     3.284436   -3.128495    1.057948
   H     2.284016   -5.085814   -0.254699
   H    -0.011066   -4.930466   -1.184722
   N     0.300750    0.549032    0.290496
   N    -0.300809   -0.548942   -0.290510
          24
Simulation Time: t =  126.00
   C    -2.280122    3.063113   -0.597521
   C    -1.756737    4.130445    0.162142
   C    -0.460172    4.042149    0.739986
   C     0.272605    2.868398    0.679003
   C    -0.334026    1.737192    0.046183
   C    -1.557140    1.875210   -0.712736
   C    -0.272622   -2.868431   -0.679016
   C     0.334026   -1.737218   -0.046186
   C     1.557161   -1.875227    0.712742
   C     2.280155   -3.063106    0.597538
   C     1.756723   -4.130396   -0.162128
   C     0.460136   -4.042114   -0.739998
   H    -3.256161    3.142318   -1.099193
   H    -2.284329    5.076340    0.258383
   H    -0.010267    4.913491    1.229354
   H     1.305330    2.866066    1.058104
   H    -2.044663    1.033346   -1.248783
   H    -1.305314   -2.866137   -1.058153
   H     2.044735   -1.033379    1.248717
   H     3.256157   -3.142173    1.099193
   H     2.284298   -5.076313   -0.258410
   H     0.010166   -4.913464   -1.229362
   N     0.299721    0.545631    0.293653
   N    -0.299706   -0.545653   -0.293649
          24
Simulation Time: t =  128.00
   C    -2.273862    3.067130   -0.608626
   C    -1.756442    4.131357    0.162873
   C    -0.468544    4.038652    0.755585
   C     0.265764    2.865637    0.692944
   C    -0.333826    1.738443    0.048599
   C    -1.548066    1.882205   -0.721581
   C    -0.265800   -2.865736   -0.692989
   C     0.333786   -1.738345   -0.048600
   C     1.548140   -1.882259    0.721607
   C     2.273893   -3.067034    0.608677
   C     1.756395   -4.131327   -0.162882
   C     0.468494   -4.038601   -0.755615
   H    -3.226990    3.157452   -1.139546
   H    -2.287949    5.068864    0.261648
   H    -0.032543    4.898513    1.274844
   H     1.281713    2.846916    1.100967
   H    -2.007724    1.051787   -1.288753
   H    -1.281699   -2.847009   -1.100956
   H     2.007808   -1.051829    1.288668
   H     3.226998   -3.157308    1.139537
   H     2.287901   -5.068838   -0.261669
   H     0.032414   -4.898515   -1.274865
   N     0.298692    0.542637    0.296650
   N    -0.298629   -0.542745   -0.296633
          24
Simulation Time: t =  130.00
   C    -2.267145    3.071189   -0.619616
   C    -1.755657    4.132028    0.163569
   C    -0.477233    4.035182    0.770995
   C     0.258564    2.863339    0.706685
   C    -0.333087    1.738642    0.051129
   C    -1.539228    1.889234   -0.730071
   C    -0.258589   -2.863369   -0.706708
   C     0.333088   -1.738661   -0.051134
   C     1.539262   -1.889246    0.730090
   C     2.267171   -3.071163    0.619637
   C     1.755632   -4.131968   -0.163556
   C     0.477196   -4.035159   -0.771015
   H    -3.198739    3.174019   -1.179464
   H    -2.295613    5.065107    0.264657
   H    -0.055586    4.885952    1.320964
   H     1.257727    2.824709    1.145094
   H    -1.966748    1.069979   -1.326773
   H    -1.257715   -2.824791   -1.145137
   H     1.966820   -1.070025    1.326650
   H     3.198743   -3.173877    1.179460
   H     2.295552   -5.065070   -0.264675
   H     0.055474   -4.885941   -1.320968
   N     0.297627    0.540327    0.299515
   N    -0.297598   -0.540373   -0.299504
          24
Simulation Time: t =  132.00
   C    -2.259829    3.075479   -0.630400
   C    -1.754553    4.132387    0.164149
   C    -0.486147    4.031835    0.786319
   C     0.250891    2.861321    0.720188
   C    -0.331828    1.737964    0.053830
   C    -1.530464    1.896220   -0.738212
   C    -0.250913   -2.861333   -0.720202
   C     0.331910   -1.738080   -0.053810
   C     1.530471   -1.896220    0.738222
   C     2.259850   -3.075447    0.630427
   C     1.754519   -4.132339   -0.164154
   C     0.486123   -4.031841   -0.786338
   H    -3.172594    3.191909   -1.219147
   H    -2.306945    5.065086    0.267412
   H    -0.079703    4.875218    1.366940
   H     1.234460    2.800008    1.190811
   H    -1.922947    1.086861   -1.363534
   H    -1.234463   -2.800085   -1.190867
   H     1.923045   -1.086862    1.363391
   H     3.172623   -3.191772    1.219137
   H     2.306870   -5.065042   -0.267432
   H     0.079620   -4.875178   -1.366895
   N     0.296563    0.538737    0.302261
   N    -0.296586   -0.538702   -0.302263
          24
Simulation Time: t =  134.00
   C    -2.251875    3.080026   -0.641030
   C    -1.753340    4.132582    0.164615
   C    -0.495169    4.028753    0.801727
   C     0.242752    2.859461    0.733499
   C    -0.330121    1.736553    0.056693
   C    -1.521653    1.903112   -0.746024
   C    -0.242769   -2.859481   -0.733514
   C     0.330191   -1.736682   -0.056681
   C     1.521669   -1.903095    0.746046
   C     2.251890   -3.080005    0.641046
   C     1.753320   -4.132520   -0.164605
   C     0.495123   -4.028752   -0.801758
   H    -3.148591    3.210911   -1.258236
   H    -2.320505    5.067170    0.269828
   H    -0.105338    4.865184    1.411591
   H     1.211961    2.773576    1.237913
   H    -1.877657    1.101619   -1.399494
   H    -1.211967   -2.773652   -1.237962
   H     1.877756   -1.101597    1.399333
   H     3.148654   -3.210799    1.258229
   H     2.320425   -5.067135   -0.269850
   H     0.105255   -4.865152   -1.411517
   N     0.295555    0.537916    0.304923
   N    -0.295570   -0.537884   -0.304925
          24
Simulation Time: t =  136.00
   C    -2.243374    3.084907   -0.651592
   C    -1.752282    4.132817    0.164945
   C    -0.504201    4.026045    0.817378
   C     0.234289    2.857613    0.746717
   C    -0.328022    1.734587    0.059740
   C    -1.512660    1.909767   -0.753568
   C    -0.234295   -2.857664   -0.746752
   C     0.328021   -1.734606   -0.059751
   C     1.512712   -1.909768    0.753602
   C     2.243381   -3.084865    0.651612
   C     1.752250   -4.132736   -0.164933
   C     0.504136   -4.026028   -0.817418
   H    -3.125834    3.230601   -1.295701
   H    -2.334306    5.068927    0.271747
   H    -0.132735    4.854744    1.453787
   H     1.189169    2.746368    1.285629
   H    -1.831938    1.114147   -1.434885
   H    -1.189206   -2.746436   -1.285681
   H     1.832030   -1.114095    1.434767
   H     3.125908   -3.230519    1.295690
   H     2.334220   -5.068877   -0.271755
   H     0.132642   -4.854753   -1.453703
   N     0.294596    0.537865    0.307510
   N    -0.294553   -0.537932   -0.307486
          24
Simulation Time: t =  138.00
   C    -2.234444    3.090199   -0.662232
   C    -1.751575    4.133284    0.165153
   C    -0.513238    4.023778    0.833375
   C     0.225683    2.855599    0.759987
   C    -0.325625    1.732231    0.062995
   C    -1.503364    1.916017   -0.760911
   C    -0.225700   -2.855714   -0.760053
   C     0.325573   -1.732143   -0.062998
   C     1.503472   -1.916065    0.760966
   C     2.234447   -3.090074    0.662272
   C     1.751527   -4.133208   -0.165157
   C     0.513140   -4.023742   -0.833423
   H    -3.102982    3.250451   -1.330298
   H    -2.346433    5.068073    0.272968
   H    -0.161810    4.843230    1.492759
   H     1.164632    2.719470    1.332820
   H    -1.786653    1.125021   -1.469386
   H    -1.164658   -2.719524   -1.332853
   H     1.786743   -1.124933    1.469310
   H     3.103043   -3.250388    1.330279
   H     2.346354   -5.068039   -0.272973
   H     0.161707   -4.843280   -1.492680
   N     0.293675    0.538537    0.309977
   N    -0.293581   -0.538681   -0.309949
          24
Simulation Time: t =  140.00
   C    -2.225179    3.095808   -0.673095
   C    -1.751325    4.134142    0.165300
   C    -0.522265    4.021898    0.849735
   C     0.217111    2.853394    0.773517
   C    -0.323034    1.729616    0.066371
   C    -1.493724    1.921743   -0.768202
   C    -0.217121   -2.853440   -0.773554
   C     0.323059   -1.729672   -0.066366
   C     1.493780   -1.921756    0.768228
   C     2.225175   -3.095740    0.673120
   C     1.751283   -4.134057   -0.165295
   C     0.522202   -4.021881   -0.849771
   H    -3.078976    3.269892   -1.360964
   H    -2.355639    5.063324    0.273480
   H    -0.192095    4.830648    1.528291
   H     1.137032    2.693906    1.378352
   H    -1.742441    1.135419   -1.502187
   H    -1.137052   -2.693942   -1.378382
   H     1.742565   -1.135279    1.502102
   H     3.079025   -3.269831    1.360917
   H     2.355572   -5.063276   -0.273473
   H     0.191984   -4.830744   -1.528222
   N     0.292776    0.539864    0.312349
   N    -0.292741   -0.539921   -0.312333
          24
Simulation Time: t =  142.00
   C    -2.215583    3.101831   -0.684230
   C    -1.751569    4.135399    0.165395
   C    -0.531399    4.020280    0.866394
   C     0.208642    2.850857    0.787409
   C    -0.320508    1.727143    0.069836
   C    -1.483614    1.926760   -0.775525
   C    -0.208647   -2.850855   -0.787420
   C     0.320606   -1.727334   -0.069819
   C     1.483626   -1.926734    0.775530
   C     2.215572   -3.101801    0.684243
   C     1.751530   -4.135319   -0.165386
   C     0.531363   -4.020269   -0.866418
   H    -3.053454    3.288436   -1.387155
   H    -2.361561    5.054751    0.273267
   H    -0.222828    4.817659    1.560775
   H     1.105844    2.670600    1.421339
   H    -1.699883    1.146608   -1.532302
   H    -1.105875   -2.670615   -1.421346
   H     1.700042   -1.146434    1.532183
   H     3.053513   -3.288391    1.387087
   H     2.361502   -5.054697   -0.273248
   H     0.222710   -4.817820   -1.560732
   N     0.291999    0.541499    0.314599
   N    -0.292015   -0.541470   -0.314595
          24
Simulation Time: t =  144.00
   C    -2.205588    3.108255   -0.695641
   C    -1.752242    4.136965    0.165454
   C    -0.540771    4.018748    0.883201
   C     0.200287    2.847894    0.801737
   C    -0.318268    1.725226    0.073319
   C    -1.472944    1.930992   -0.782969
   C    -0.200292   -2.847974   -0.801792
   C     0.318259   -1.725248   -0.073320
   C     1.473039   -1.931019    0.783011
   C     2.205568   -3.108150    0.695664
   C     1.752206   -4.136876   -0.165445
   C     0.540674   -4.018698   -0.883238
   H    -3.026794    3.305768   -1.408951
   H    -2.364843    5.043785    0.272571
   H    -0.253099    4.805384    1.591148
   H     1.071333    2.650193    1.461466
   H    -1.659650    1.159489   -1.558883
   H    -1.071345   -2.650198   -1.461453
   H     1.659774   -1.159345    1.558797
   H     3.026842   -3.305762    1.408890
   H     2.364790   -5.043724   -0.272541
   H     0.252990   -4.805561   -1.591114
   N     0.291429    0.543086    0.316756
   N    -0.291368   -0.543185   -0.316734
          24
Simulation Time: t =  146.00
   C    -2.195043    3.114928   -0.707281
   C    -1.753230    4.138604    0.165458
   C    -0.550418    4.017050    0.900030
   C     0.191984    2.844578    0.816580
   C    -0.316320    1.723934    0.076833
   C    -1.461810    1.934570   -0.790622
   C    -0.191988   -2.844682   -0.816657
   C     0.316260   -1.723863   -0.076838
   C     1.461931   -1.934618    0.790673
   C     2.195019   -3.114794    0.707308
   C     1.753175   -4.138503   -0.165458
   C     0.550314   -4.017000   -0.900065
   H    -3.000003    3.321838   -1.427100
   H    -2.366807    5.032991    0.271645
   H    -0.282060    4.794888    1.620455
   H     1.034627    2.633104    1.498922
   H    -1.622352    1.174439   -1.581728
   H    -1.034646   -2.633079   -1.498910
   H     1.622468   -1.174301    1.581631
   H     3.000030   -3.321852    1.427034
   H     2.366756   -5.032912   -0.271593
   H     0.281970   -4.795054   -1.620385
   N     0.291017    0.544478    0.318780
   N    -0.290908   -0.544656   -0.318743
          24
Simulation Time: t =  148.00
   C    -2.183759    3.121711   -0.719046
   C    -1.754355    4.140058    0.165391
   C    -0.560396    4.015020    0.916749
   C     0.183579    2.840978    0.831956
   C    -0.314662    1.723311    0.080369
   C    -1.450257    1.937693   -0.798494
   C    -0.183586   -2.840984   -0.831985
   C     0.314740   -1.723487   -0.080353
   C     1.450297   -1.937670    0.798506
   C     2.183732   -3.121652    0.719062
   C     1.754298   -4.139971   -0.165394
   C     0.560358   -4.015005   -0.916770
   H    -2.974576    3.336782   -1.442845
   H    -2.369147    5.025157    0.270798
   H    -0.309146    4.786788    1.649367
   H     0.997501    2.619325    1.534576
   H    -1.588575    1.191097   -1.601240
   H    -0.997531   -2.619288   -1.534556
   H     1.588750   -1.190928    1.601073
   H     2.974595   -3.336767    1.442748
   H     2.369108   -5.025065   -0.270749
   H     0.309054   -4.786954   -1.649254
   N     0.290708    0.545531    0.320635
   N    -0.290699   -0.545543   -0.320620
          24
Simulation Time: t =  150.00
   C    -2.171525    3.128577   -0.730783
   C    -1.755487    4.141172    0.165250
   C    -0.570816    4.012584    0.933268
   C     0.174872    2.837085    0.847759
   C    -0.313483    1.723719    0.083889
   C    -1.438222    1.940499   -0.806503
   C    -0.174882   -2.837120   -0.847804
   C     0.313560   -1.723881   -0.083852
   C     1.438273   -1.940478    0.806517
   C     2.171500   -3.128497    0.730806
   C     1.755426   -4.141092   -0.165263
   C     0.570761   -4.012559   -0.933289
   H    -2.952137    3.350782   -1.457597
   H    -2.373203    5.022355    0.270263
   H    -0.334118    4.781030    1.677916
   H     0.962082    2.608556    1.569554
   H    -1.558954    1.208465   -1.618167
   H    -0.962111   -2.608506   -1.569529
   H     1.559140   -1.208290    1.617993
   H     2.952137   -3.350767    1.457503
   H     2.373181   -5.022235   -0.270218
   H     0.334027   -4.781169   -1.677773
   N     0.290631    0.545897    0.322357
   N    -0.290614   -0.545921   -0.322349
          24
Simulation Time: t =  152.00
   C    -2.158205    3.135385   -0.742410
   C    -1.756510    4.141943    0.165115
   C    -0.581710    4.009687    0.949544
   C     0.165692    2.833081    0.863964
   C    -0.312828    1.725137    0.087333
   C    -1.425753    1.943229   -0.814565
   C    -0.165683   -2.833199   -0.864061
   C     0.312773   -1.725078   -0.087322
   C     1.425873   -1.943258    0.814616
   C     2.158181   -3.135251    0.742438
   C     1.756453   -4.141838   -0.165120
   C     0.581586   -4.009626   -0.949577
   H    -2.933733    3.363929   -1.472502
   H    -2.379289    5.025035    0.270015
   H    -0.357004    4.776872    1.705507
   H     0.930104    2.600287    1.604907
   H    -1.533850    1.225309   -1.633685
   H    -0.930153   -2.600208   -1.604907
   H     1.533972   -1.225173    1.633550
   H     2.933711   -3.363948    1.472424
   H     2.379264   -5.024919   -0.269956
   H     0.356908   -4.776999   -1.705368
   N     0.290776    0.545436    0.323953
   N    -0.290658   -0.545631   -0.323914
          24
Simulation Time: t =  154.00
   C    -2.143812    3.141963   -0.753928
   C    -1.757428    4.142474    0.165054
   C    -0.592991    4.006269    0.965567
   C     0.155926    2.829218    0.880663
   C    -0.312471    1.727156    0.090726
   C    -1.413011    1.946223   -0.822652
   C    -0.155927   -2.829253   -0.880724
   C     0.312504   -1.727274   -0.090700
   C     1.413073   -1.946200    0.822670
   C     2.143779   -3.141881    0.753941
   C     1.757355   -4.142377   -0.165071
   C     0.592936   -4.006241   -0.965575
   H    -2.919218    3.376076   -1.487877
   H    -2.386572    5.031854    0.269804
   H    -0.377984    4.773255    1.731396
   H     0.902456    2.594080    1.641063
   H    -1.513342    1.240332   -1.649047
   H    -0.902499   -2.594012   -1.641052
   H     1.513517   -1.240163    1.648871
   H     2.919217   -3.376090    1.487819
   H     2.386554   -5.031719   -0.269752
   H     0.377869   -4.773388   -1.731237
   N     0.290994    0.544382    0.325420
   N    -0.290937   -0.544464   -0.325395
          24
Simulation Time: t =  156.00
   C    -2.128459    3.148327   -0.765406
   C    -1.758292    4.142987    0.165153
   C    -0.604754    4.002394    0.981318
   C     0.145613    2.825455    0.897892
   C    -0.312467    1.729863    0.094068
   C    -1.400010    1.949660   -0.830664
   C    -0.145614   -2.825450   -0.897920
   C     0.312573   -1.730127   -0.094036
   C     1.400045   -1.949612    0.830660
   C     2.128423   -3.148277    0.765410
   C     1.758226   -4.142894   -0.165164
   C     0.604720   -4.002383   -0.981324
   H    -2.907470    3.386680   -1.503080
   H    -2.393407    5.040288    0.269207
   H    -0.397214    4.769109    1.754758
   H     0.878955    2.589803    1.677424
   H    -1.497383    1.252564   -1.664982
   H    -0.879009   -2.589726   -1.677417
   H     1.497581   -1.252358    1.664798
   H     2.907462   -3.386673    1.503035
   H     2.393393   -5.040153   -0.269162
   H     0.397108   -4.769205   -1.754571
   N     0.291347    0.542618    0.326787
   N    -0.291350   -0.542593   -0.326776
          24
Simulation Time: t =  158.00
   C    -2.112332    3.154542   -0.776912
   C    -1.759243    4.143678    0.165411
   C    -0.616954    3.998109    0.996831
   C     0.134800    2.821782    0.915712
   C    -0.312736    1.733232    0.097440
   C    -1.386846    1.953643   -0.838633
   C    -0.134794   -2.821850   -0.915797
   C     0.312756   -1.733317   -0.097395
   C     1.386937   -1.953647    0.838651
   C     2.112288   -3.154414    0.776940
   C     1.759153   -4.143584   -0.165452
   C     0.616886   -3.998082   -0.996832
   H    -2.896788    3.395124   -1.517033
   H    -2.398066    5.047661    0.267811
   H    -0.414944    4.763530    1.774953
   H     0.858658    2.587368    1.712720
   H    -1.485612    1.261827   -1.681341
   H    -0.858717   -2.587308   -1.712706
   H     1.485804   -1.261611    1.681162
   H     2.896744   -3.395139    1.517023
   H     2.398061   -5.047507   -0.267789
   H     0.414828   -4.763615   -1.774734
   N     0.291870    0.540157    0.328094
   N    -0.291794   -0.540261   -0.328066
          24
Simulation Time: t =  160.00
   C    -2.095607    3.160531   -0.788540
   C    -1.760304    4.144706    0.165900
   C    -0.629513    3.993464    1.012122
   C     0.123536    2.818318    0.934290
   C    -0.312992    1.736763    0.100892
   C    -1.373688    1.958247   -0.846722
   C    -0.123518   -2.818402   -0.934379
   C     0.312953   -1.736789   -0.100884
   C     1.373789   -1.958247    0.846752
   C     2.095568   -3.160435    0.788544
   C     1.760234   -4.144582   -0.165902
   C     0.629415   -3.993404   -1.012136
   H    -2.885572    3.401004   -1.528829
   H    -2.399390    5.051946    0.265381
   H    -0.431452    4.756068    1.791680
   H     0.840414    2.586715    1.745392
   H    -1.477458    1.268687   -1.697015
   H    -0.840455   -2.586666   -1.745360
   H     1.477617   -1.268492    1.696876
   H     2.885537   -3.400998    1.528824
   H     2.399359   -5.051814   -0.265336
   H     0.431321   -4.756146   -1.791492
   N     0.292406    0.537382    0.329366
   N    -0.292293   -0.537549   -0.329321
          24
Simulation Time: t =  162.00
   C    -2.078468    3.166460   -0.800256
   C    -1.761503    4.146043    0.166543
   C    -0.642380    3.988467    1.027224
   C     0.111861    2.815051    0.953652
   C    -0.313023    1.740167    0.104575
   C    -1.360586    1.963349   -0.855095
   C    -0.111839   -2.815104   -0.953734
   C     0.313088   -1.740319   -0.104506
   C     1.360648   -1.963335    0.855082
   C     2.078418   -3.166350    0.800283
   C     1.761408   -4.145948   -0.166587
   C     0.642322   -3.988436   -1.027210
   H    -2.872736    3.404084   -1.537964
   H    -2.396974    5.052474    0.261726
   H    -0.446888    4.746900    1.805178
   H     0.823162    2.587676    1.774096
   H    -1.472188    1.274168   -1.710467
   H    -0.823209   -2.587643   -1.774053
   H     1.472429   -1.273929    1.710275
   H     2.872683   -3.404062    1.537974
   H     2.396970   -5.052320   -0.261735
   H     0.446715   -4.746981   -1.804998
   N     0.292865    0.534559    0.330585
   N    -0.292815   -0.534623   -0.330562
          24
Simulation Time: t =  164.00
   C    -2.061060    3.172332   -0.812082
   C    -1.762658    4.147629    0.167414
   C    -0.655633    3.983201    1.042013
   C     0.099816    2.811921    0.973803
   C    -0.312799    1.743288    0.108446
   C    -1.347514    1.968861   -0.863799
   C    -0.099787   -2.811951   -0.973850
   C     0.312894   -1.743547   -0.108408
   C     1.347565   -1.968832    0.863785
   C     2.061015   -3.172273    0.812074
   C     1.762609   -4.147523   -0.167401
   C     0.655545   -3.983140   -1.042013
   H    -2.857737    3.404465   -1.544552
   H    -2.391580    5.049829    0.257068
   H    -0.461303    4.736847    1.816445
   H     0.806368    2.590007    1.798101
   H    -1.469209    1.279020   -1.720256
   H    -0.806402   -2.589990   -1.798057
   H     1.469458   -1.278802    1.720066
   H     2.857679   -3.404403    1.544561
   H     2.391543   -5.049681   -0.257049
   H     0.461142   -4.736912   -1.816314
   N     0.293254    0.531883    0.331827
   N    -0.293245   -0.531882   -0.331813
          24
Simulation Time: t =  166.00
   C    -2.043503    3.178335   -0.823846
   C    -1.763703    4.149189    0.168329
   C    -0.669225    3.977591    1.056453
   C     0.087397    2.808827    0.994560
   C    -0.312207    1.746049    0.112648
   C    -1.334468    1.974701   -0.872856
   C    -0.087365   -2.808859   -0.994633
   C     0.312287   -1.746222   -0.112572
   C     1.334523   -1.974700    0.872816
   C     2.043439   -3.178222    0.823867
   C     1.763602   -4.149087   -0.168371
   C     0.669177   -3.977556   -1.056424
   H    -2.840879    3.402505   -1.549436
   H    -2.384593    5.045920    0.251434
   H    -0.474675    4.727199    1.826949
   H     0.790083    2.593267    1.817621
   H    -1.467761    1.283683   -1.725742
   H    -0.790139   -2.593284   -1.817567
   H     1.468054   -1.283452    1.725521
   H     2.840786   -3.402426    1.549466
   H     2.384560   -5.045784   -0.251452
   H     0.474491   -4.727275   -1.826804
   N     0.293574    0.529505    0.333119
   N    -0.293528   -0.529569   -0.333094
          24
Simulation Time: t =  168.00
   C    -2.025805    3.184476   -0.835407
   C    -1.764369    4.150471    0.169303
   C    -0.683248    3.971688    1.070380
   C     0.074548    2.805662    1.015737
   C    -0.311212    1.748279    0.117115
   C    -1.321371    1.980859   -0.882126
   C    -0.074497   -2.805781   -1.015831
   C     0.311176   -1.748295   -0.117092
   C     1.321515   -1.980917    0.882137
   C     2.025735   -3.184319    0.835426
   C     1.764308   -4.150358   -0.169297
   C     0.683106   -3.971589   -1.070391
   H    -2.823190    3.398897   -1.554124
   H    -2.377964    5.043143    0.245127
   H    -0.487030    4.719318    1.838152
   H     0.775080    2.596815    1.833723
   H    -1.467329    1.287953   -1.726961
   H    -0.775147   -2.596852   -1.833685
   H     1.467566   -1.287789    1.726757
   H     2.823076   -3.398812    1.554185
   H     2.377918   -5.042993   -0.245146
   H     0.486869   -4.719349   -1.838056
   N     0.293766    0.527605    0.334527
   N    -0.293658   -0.527779   -0.334487
          24
Simulation Time: t =  170.00
   C    -2.007984    3.190837   -0.846552
   C    -1.764622    4.151226    0.170131
   C    -0.697556    3.965422    1.083832
   C     0.061174    2.802397    1.037038
   C    -0.309684    1.749806    0.121960
   C    -1.308245    1.987387   -0.891477
   C    -0.061112   -2.802501   -1.037131
   C     0.309671   -1.749829   -0.121894
   C     1.308361   -1.987434    0.891457
   C     2.007903   -3.190665    0.846582
   C     1.764526   -4.151121   -0.170166
   C     0.697452   -3.965347   -1.083816
   H    -2.806007    3.394471   -1.560301
   H    -2.373319    5.043590    0.238230
   H    -0.498563    4.714007    1.851038
   H     0.762515    2.599957    1.848008
   H    -1.467345    1.291220   -1.724881
   H    -0.762606   -2.600020   -1.847980
   H     1.467629   -1.291068    1.724617
   H     2.805894   -3.394381    1.560377
   H     2.373281   -5.043449   -0.238290
   H     0.498379   -4.714045   -1.850934
   N     0.293781    0.526342    0.336106
   N    -0.293671   -0.526515   -0.336067
          24
Simulation Time: t =  172.00
   C    -1.990095    3.197468   -0.857184
   C    -1.764327    4.151370    0.170832
   C    -0.712243    3.959003    1.096774
   C     0.047254    2.798813    1.058187
   C    -0.307729    1.750667    0.127033
   C    -1.294873    1.994265   -0.900545
   C    -0.047171   -2.798887   -1.058245
   C     0.307768   -1.750809   -0.126990
   C     1.294957   -1.994284    0.900518
   C     1.990021   -3.197353    0.857186
   C     1.764266   -4.151259   -0.170819
   C     0.712118   -3.958915   -1.096771
   H    -2.790333    3.390061   -1.569212
   H    -2.371510    5.048125    0.230866
   H    -0.509604    4.711283    1.865624
   H     0.753326    2.602091    1.862088
   H    -1.467591    1.292455   -1.720864
   H    -0.753420   -2.602191   -1.862059
   H     1.467894   -1.292311    1.720587
   H     2.790219   -3.389940    1.569280
   H     2.371439   -5.048004   -0.230917
   H     0.509419   -4.711277   -1.865523
   N     0.293593    0.525666    0.337907
   N    -0.293534   -0.525754   -0.337878
          24
Simulation Time: t =  174.00
   C    -1.972275    3.204496   -0.867220
   C    -1.763612    4.150948    0.171240
   C    -0.727215    3.952589    1.109367
   C     0.032818    2.794724    1.078915
   C    -0.305432    1.750959    0.132349
   C    -1.281100    2.001447   -0.909049
   C    -0.032728   -2.794786   -1.078966
   C     0.305533   -1.751152   -0.132277
   C     1.281163   -2.001469    0.909000
   C     1.972196   -3.204363    0.867236
   C     1.763541   -4.150855   -0.171252
   C     0.727103   -3.952526   -1.109359
   H    -2.776369    3.386367   -1.581286
   H    -2.372079    5.055966    0.222969
   H    -0.520813    4.710138    1.881177
   H     0.747896    2.602945    1.876888
   H    -1.467804    1.290888   -1.716251
   H    -0.748011   -2.603070   -1.876853
   H     1.468153   -1.290722    1.715942
   H     2.776237   -3.386222    1.581345
   H     2.372008   -5.055856   -0.223039
   H     0.520629   -4.710100   -1.881041
   N     0.293229    0.525515    0.339975
   N    -0.293211   -0.525550   -0.339950
          24
Simulation Time: t =  176.00
   C    -1.954692    3.211916   -0.876735
   C    -1.762616    4.150207    0.171347
   C    -0.742399    3.946441    1.121794
   C     0.017962    2.789982    1.099089
   C    -0.302983    1.750788    0.137770
   C    -1.266761    2.008839   -0.916734
   C    -0.017865   -2.790029   -1.099123
   C     0.303010   -1.750922   -0.137736
   C     1.266844   -2.008866    0.916694
   C     1.954616   -3.211799    0.876733
   C     1.762546   -4.150092   -0.171335
   C     0.742279   -3.946378   -1.121789
   H    -2.763486    3.383884   -1.596097
   H    -2.373686    5.064982    0.214513
   H    -0.532944    4.709156    1.896233
   H     0.745701    2.602415    1.892520
   H    -1.467715    1.286329   -1.711713
   H    -0.745801   -2.602574   -1.892474
   H     1.468049   -1.286162    1.711431
   H     2.763341   -3.383740    1.596159
   H     2.373603   -5.064876   -0.214598
   H     0.532759   -4.709099   -1.896115
   N     0.292707    0.525714    0.342334
   N    -0.292644   -0.525810   -0.342302
          24
Simulation Time: t =  178.00
   C    -1.937539    3.219760   -0.885799
   C    -1.761561    4.149403    0.171046
   C    -0.757650    3.940716    1.134273
   C     0.002823    2.784456    1.118611
   C    -0.300426    1.750235    0.143293
   C    -1.251788    2.016275   -0.923505
   C    -0.002725   -2.784565   -1.118677
   C     0.300366   -1.750200   -0.143282
   C     1.251942   -2.016339    0.923499
   C     1.937445   -3.219582    0.885826
   C     1.761488   -4.149300   -0.171039
   C     0.757498   -3.940632   -1.134297
   H    -2.750420    3.382937   -1.612566
   H    -2.374647    5.072593    0.205519
   H    -0.546809    4.706938    1.909533
   H     0.745506    2.600730    1.908166
   H    -1.466887    1.279442   -1.707111
   H    -0.745588   -2.600928   -1.908080
   H     1.467180   -1.279297    1.706860
   H     2.750283   -3.382814    1.612659
   H     2.374587   -5.072487   -0.205636
   H     0.546626   -4.706889   -1.909452
   N     0.291977    0.526183    0.345002
   N    -0.291856   -0.526395   -0.344950
          24
Simulation Time: t =  180.00
   C    -1.920956    3.227854   -0.894621
   C    -1.760605    4.148830    0.170347
   C    -0.772804    3.935438    1.146967
   C    -0.012424    2.778187    1.137545
   C    -0.297844    1.749281    0.148850
   C    -1.236248    2.023622   -0.929361
   C     0.012530   -2.778249   -1.137569
   C     0.297769   -1.749292   -0.148884
   C     1.236394   -2.023663    0.929365
   C     1.920873   -3.227733    0.894610
   C     1.760557   -4.148709   -0.170290
   C     0.772642   -3.935370   -1.147005
   H    -2.735629    3.383787   -1.629369
   H    -2.373611    5.076760    0.196126
   H    -0.562911    4.702763    1.920367
   H     0.745353    2.598215    1.922632
   H    -1.464661    1.271626   -1.701774
   H    -0.745440   -2.598425   -1.922538
   H     1.464978   -1.271475    1.701524
   H     2.735498   -3.383676    1.629469
   H     2.373543   -5.076653   -0.196237
   H     0.562737   -4.702716   -1.920318
   N     0.291011    0.526871    0.347972
   N    -0.290901   -0.527053   -0.347925
          24
Simulation Time: t =  182.00
   C    -1.905092    3.236133   -0.903323
   C    -1.759861    4.148614    0.169178
   C    -0.787719    3.930533    1.159928
   C    -0.027620    2.771159    1.155888
   C    -0.295332    1.748145    0.154441
   C    -1.220187    2.030719   -0.934320
   C     0.027715   -2.771105   -1.155862
   C     0.295358   -1.748335   -0.154476
   C     1.220249   -2.030707    0.934292
   C     1.905027   -3.236085    0.903266
   C     1.759823   -4.148493   -0.169108
   C     0.787609   -3.930532   -1.159938
   H    -2.717726    3.386635   -1.645301
   H    -2.369972    5.076591    0.186521
   H    -0.581466    4.696680    1.929012
   H     0.743458    2.595292    1.934765
   H    -1.460504    1.264341   -1.694894
   H    -0.743504   -2.595516   -1.934640
   H     1.460853   -1.264176    1.694651
   H     2.717618   -3.386536    1.645404
   H     2.369863   -5.076523   -0.186592
   H     0.581302   -4.696659   -1.928998
   N     0.289808    0.527563    0.351252
   N    -0.289777   -0.527612   -0.351217
          24
Simulation Time: t =  184.00
   C    -1.890010    3.244465   -0.912014
   C    -1.759285    4.148805    0.167602
   C    -0.802385    3.925866    1.173020
   C    -0.042624    2.763402    1.173656
   C    -0.293144    1.747124    0.159974
   C    -1.203596    2.037430   -0.938318
   C     0.042724   -2.763341   -1.173618
   C     0.293121   -1.747277   -0.160072
   C     1.203691   -2.037428    0.938329
   C     1.889950   -3.244430    0.911938
   C     1.759283   -4.148685   -0.167479
   C     0.802236   -3.925858   -1.173061
   H    -2.696021    3.391651   -1.659690
   H    -2.363962    5.072660    0.176914
   H    -0.602354    4.689589    1.936622
   H     0.738311    2.592215    1.944050
   H    -1.453854    1.258887   -1.686091
   H    -0.738349   -2.592419   -1.943914
   H     1.454185   -1.258720    1.685897
   H     2.695900   -3.391584    1.659789
   H     2.363875   -5.072578   -0.176973
   H     0.602189   -4.689612   -1.936645
   N     0.288457    0.527998    0.354856
   N    -0.288419   -0.528068   -0.354816
          24
Simulation Time: t =  186.00
   C    -1.875647    3.252642   -0.920740
   C    -1.758780    4.149329    0.165660
   C    -0.816701    3.921124    1.186088
   C    -0.057432    2.755135    1.190837
   C    -0.291377    1.746374    0.165450
   C    -1.186617    2.043746   -0.941385
   C     0.057511   -2.755077   -1.190796
   C     0.291213   -1.746347   -0.165593
   C     1.186788   -2.043777    0.941431
   C     1.875583   -3.252589    0.920665
   C     1.758771   -4.149198   -0.165518
   C     0.816557   -3.921119   -1.186152
   H    -2.670642    3.399092   -1.672750
   H    -2.356705    5.066753    0.167587
   H    -0.625236    4.682871    1.944886
   H     0.729451    2.589027    1.950792
   H    -1.444402    1.256043   -1.675416
   H    -0.729488   -2.589215   -1.950641
   H     1.444689   -1.255906    1.675303
   H     2.670520   -3.399056    1.672826
   H     2.356656   -5.066648   -0.167627
   H     0.625065   -4.682919   -1.944950
   N     0.286950    0.527972    0.358769
   N    -0.286831   -0.528182   -0.358725
          24
Simulation Time: t =  188.00
   C    -1.861811    3.260392   -0.929473
   C    -1.758112    4.150018    0.163481
   C    -0.830679    3.916050    1.198929
   C    -0.072085    2.746628    1.207380
   C    -0.289998    1.745787    0.170844
   C    -1.169467    2.049774   -0.943517
   C     0.072157   -2.746511   -1.207303
   C     0.289816   -1.745814   -0.171038
   C     1.169623   -2.049778    0.943576
   C     1.861766   -3.260406    0.929347
   C     1.758135   -4.149877   -0.163275
   C     0.830531   -3.916051   -1.198995
   H    -2.642702    3.409172   -1.685482
   H    -2.349845    5.061439    0.158756
   H    -0.649730    4.677767    1.955397
   H     0.717323    2.585522    1.956241
   H    -1.431911    1.255984   -1.663697
   H    -0.717348   -2.585666   -1.956077
   H     1.432203   -1.255862    1.663605
   H     2.642584   -3.409192    1.685529
   H     2.349822   -5.061329   -0.158752
   H     0.649549   -4.677878   -1.955498
   N     0.285212    0.527520    0.362992
   N    -0.285103   -0.527698   -0.362957
          24
Simulation Time: t =  190.00
   C    -1.848274    3.267618   -0.938004
   C    -1.757141    4.150648    0.161058
   C    -0.844301    3.910461    1.211400
   C    -0.086708    2.738052    1.223125
   C    -0.289030    1.745527    0.176223
   C    -1.152275    2.055602   -0.944719
   C     0.086789   -2.737880   -1.223023
   C     0.288961   -1.745699   -0.176431
   C     1.152372   -2.055589    0.944762
   C     1.848248   -3.267665    0.937859
   C     1.757188   -4.150536   -0.160845
   C     0.844166   -3.910489   -1.211445
   H    -2.613772    3.422164   -1.699432
   H    -2.344929    5.059230    0.150577
   H    -0.675486    4.674861    1.969056
   H     0.703121    2.581338    1.962202
   H    -1.416545    1.258155   -1.652129
   H    -0.703162   -2.581429   -1.962027
   H     1.416851   -1.258046    1.652047
   H     2.613660   -3.422222    1.699418
   H     2.344894   -5.059145   -0.150494
   H     0.675318   -4.674972   -1.969134
   N     0.283238    0.526477    0.367511
   N    -0.283232   -0.526514   -0.367483
          24
Simulation Time: t =  192.00
   C    -1.834808    3.274249   -0.946095
   C    -1.755797    4.151075    0.158355
   C    -0.857571    3.904363    1.223439
   C    -0.101433    2.729492    1.237900
   C    -0.288569    1.745790    0.181730
   C    -1.135155    2.061372   -0.945029
   C     0.101501   -2.729339   -1.237811
   C     0.288482   -1.745921   -0.181916
   C     1.135259   -2.061366    0.945055
   C     1.834793   -3.274284    0.945964
   C     1.755825   -4.150984   -0.158173
   C     0.857455   -3.904386   -1.223458
   H    -2.585352    3.438162   -1.716001
   H    -2.342774    5.061543    0.143195
   H    -0.702349    4.673569    1.985725
   H     0.688187    2.576026    1.970612
   H    -1.398607    1.261588   -1.642257
   H    -0.688243   -2.576055   -1.970430
   H     1.398857   -1.261525    1.642220
   H     2.585216   -3.438274    1.715936
   H     2.342781   -5.061441   -0.143050
   H     0.702221   -4.673653   -1.985770
   N     0.281137    0.524649    0.372312
   N    -0.281118   -0.524696   -0.372292
          24
Simulation Time: t =  194.00
   C    -1.821262    3.280263   -0.953562
   C    -1.754091    4.151264    0.155338
   C    -0.870534    3.897861    1.235076
   C    -0.116294    2.721028    1.251603
   C    -0.288496    1.746518    0.187532
   C    -1.118286    2.067237   -0.944535
   C     0.116347   -2.720968   -1.251556
   C     0.288319   -1.746475   -0.187697
   C     1.118456   -2.067264    0.944551
   C     1.821243   -3.280242    0.953482
   C     1.754084   -4.151198   -0.155209
   C     0.870416   -3.897832   -1.235075
   H    -2.558073    3.457042   -1.735931
   H    -2.343092    5.068057    0.136670
   H    -0.730186    4.672479    2.004324
   H     0.673484    2.569224    1.982908
   H    -1.378454    1.265201   -1.635570
   H    -0.673555   -2.569192   -1.982714
   H     1.378600   -1.265211    1.635618
   H     2.557928   -3.457211    1.735811
   H     2.343183   -5.067939   -0.136494
   H     0.730113   -4.672519   -2.004345
   N     0.278871    0.522074    0.377386
   N    -0.278782   -0.522234   -0.377362
          24
Simulation Time: t =  196.00
   C    -1.807596    3.285690   -0.960339
   C    -1.752081    4.151312    0.152002
   C    -0.883212    3.891055    1.246353
   C    -0.131253    2.712775    1.264247
   C    -0.288603    1.747518    0.193817
   C    -1.101900    2.073300   -0.943407
   C     0.131308   -2.712810   -1.264257
   C     0.288515   -1.747454   -0.193870
   C     1.102042   -2.073351    0.943370
   C     1.807580   -3.285590    0.960330
   C     1.752035   -4.151314   -0.151989
   C     0.883114   -3.890994   -1.246297
   H    -2.531464    3.478270   -1.758846
   H    -2.344694    5.076867    0.131082
   H    -0.758988    4.669785    2.023475
   H     0.659084    2.560742    1.999633
   H    -1.356231    1.268349   -1.633163
   H    -0.659180   -2.560651   -1.999427
   H     1.356330   -1.268430    1.633229
   H     2.531341   -3.478479    1.758689
   H     2.344814   -5.076762   -0.130834
   H     0.758942   -4.669770   -2.023473
   N     0.276320    0.518871    0.382705
   N    -0.276273   -0.518983   -0.382699
          24
Simulation Time: t =  198.00
   C    -1.793858    3.290493   -0.966594
   C    -1.749808    4.151482    0.148602
   C    -0.895730    3.884064    1.257216
   C    -0.146172    2.704904    1.276033
   C    -0.288905    1.748626    0.200544
   C    -1.086121    2.079588   -0.941783
   C     0.146257   -2.704944   -1.276038
   C     0.288954   -1.748730   -0.200551
   C     1.086177   -2.079603    0.941679
   C     1.793869   -3.290439    0.966567
   C     1.749770   -4.151511   -0.148597
   C     0.895620   -3.883973   -1.257099
   H    -2.504165    3.500924   -1.783339
   H    -2.345835    5.085368    0.126383
   H    -0.788604    4.663888    2.041869
   H     0.644106    2.550646    2.020245
   H    -1.331968    1.271102   -1.635307
   H    -0.644200   -2.550469   -2.020075
   H     1.332017   -1.271248    1.635370
   H     2.504080   -3.501189    1.783188
   H     2.345989   -5.085260   -0.126091
   H     0.788601   -4.663837   -2.041857
   N     0.273516    0.515116    0.388308
   N    -0.273563   -0.515074   -0.388318
          24
Simulation Time: t =  200.00
   C    -1.780198    3.294902   -0.972447
   C    -1.747365    4.151958    0.145242
   C    -0.908161    3.876971    1.267545
   C    -0.160893    2.697457    1.287208
   C    -0.289421    1.749840    0.207723
   C    -1.070976    2.085935   -0.939815
   C     0.160960   -2.697559   -1.287251
   C     0.289532   -1.749918   -0.207616
   C     1.071019   -2.085990    0.939658
   C     1.780202   -3.294751    0.972467
   C     1.747271   -4.152038   -0.145355
   C     0.908103   -3.876881   -1.267370
   H    -2.474517    3.523920   -1.807469
   H    -2.345031    5.091111    0.122529
   H    -0.818869    4.653745    2.058770
   H     0.626962    2.539118    2.043449
   H    -1.305430    1.274232   -1.641552
   H    -0.627059   -2.538910   -2.043283
   H     1.305389   -1.274456    1.641649
   H     2.474483   -3.524207    1.807348
   H     2.345171   -5.091057   -0.122199
   H     0.818897   -4.653619   -2.058700
   N     0.270491    0.510761    0.394193
   N    -0.270553   -0.510689   -0.394223
          24
Simulation Time: t =  202.00
   C    -1.766700    3.298929   -0.978140
   C    -1.744678    4.152900    0.142282
   C    -0.920748    3.869911    1.277126
   C    -0.175170    2.690516    1.298129
   C    -0.290163    1.750882    0.215147
   C    -1.056501    2.092196   -0.937639
   C     0.175253   -2.690733   -1.298198
   C     0.290180   -1.750807   -0.215090
   C     1.056656   -2.092322    0.937532
   C     1.766676   -3.298728    0.978174
   C     1.744604   -4.152993   -0.142354
   C     0.920613   -3.869727   -1.276998
   H    -2.441271    3.546215   -1.829438
   H    -2.341335    5.092747    0.119423
   H    -0.849469    4.638993    2.073947
   H     0.605996    2.526451    2.067651
   H    -1.276244    1.279045   -1.650964
   H    -0.606077   -2.526198   -2.067539
   H     1.276096   -1.279334    1.651092
   H     2.441265   -3.546525    1.829372
   H     2.341536   -5.092647   -0.119116
   H     0.849499   -4.638819   -2.073795
   N     0.267228    0.505956    0.400386
   N    -0.267248   -0.505972   -0.400407
          24
Simulation Time: t =  204.00
   C    -1.753371    3.302745   -0.983722
   C    -1.741776    4.154262    0.139706
   C    -0.933483    3.862829    1.285902
   C    -0.188898    2.684172    1.309044
   C    -0.290953    1.751417    0.222916
   C    -1.042850    2.098233   -0.935558
   C     0.188959   -2.684421   -1.309115
   C     0.290970   -1.751301   -0.222811
   C     1.043009   -2.098382    0.935429
   C     1.753337   -3.302495    0.983751
   C     1.741664   -4.154365   -0.139825
   C     0.933392   -3.862641   -1.285744
   H    -2.403948    3.567033   -1.848205
   H    -2.334851    5.090123    0.116994
   H    -0.880075    4.620075    2.087848
   H     0.580137    2.512855    2.091652
   H    -1.244167    1.286835   -1.662356
   H    -0.580152   -2.512596   -2.091593
   H     1.243886   -1.287211    1.662531
   H     2.403988   -3.567340    1.848190
   H     2.334982   -5.090095   -0.116699
   H     0.880126   -4.619857   -2.087656
   N     0.263686    0.500957    0.406873
   N    -0.263682   -0.500989   -0.406902
          24
Simulation Time: t =  206.00
   C    -1.740172    3.306477   -0.989103
   C    -1.738540    4.155884    0.137630
   C    -0.946552    3.855774    1.293670
   C    -0.201982    2.678337    1.320059
   C    -0.291749    1.751307    0.230953
   C    -1.029978    2.103885   -0.933723
   C     0.202059   -2.678643   -1.320134
   C     0.291822   -1.751215   -0.230835
   C     1.030139   -2.104061    0.933599
   C     1.740143   -3.306209    0.989132
   C     1.738440   -4.156008   -0.137733
   C     0.946426   -3.855542   -1.293528
   H    -2.362937    3.585950   -1.863762
   H    -2.326332    5.084670    0.115018
   H    -0.910406    4.598239    2.101531
   H     0.549054    2.498420    2.115024
   H    -1.209084    1.298523   -1.674788
   H    -0.548988   -2.498175   -2.115005
   H     1.208723   -1.298939    1.674990
   H     2.362981   -3.586200    1.863770
   H     2.326417   -5.084658   -0.114759
   H     0.910439   -4.597984   -2.101326
   N     0.259819    0.495882    0.413669
   N    -0.259856   -0.495858   -0.413707
          24
Simulation Time: t =  208.00
   C    -1.727002    3.310230   -0.994130
   C    -1.734918    4.157533    0.135980
   C    -0.959916    3.848612    1.300364
   C    -0.214477    2.673008    1.331185
   C    -0.292506    1.750416    0.239340
   C    -1.017910    2.109128   -0.932327
   C     0.214555   -2.673293   -1.331235
   C     0.292658   -1.750433   -0.239195
   C     1.018026   -2.109283    0.932164
   C     1.726995   -3.309996    0.994129
   C     1.734815   -4.157654   -0.136067
   C     0.959794   -3.848390   -1.300196
   H    -2.319235    3.602859   -1.877024
   H    -2.317255    5.078721    0.113277
   H    -0.940267    4.575154    2.116421
   H     0.513297    2.483136    2.138095
   H    -1.171212    1.314305   -1.687768
   H    -0.513130   -2.482933   -2.138139
   H     1.170768   -1.314762    1.688000
   H     2.319257   -3.603024    1.877017
   H     2.317294   -5.078739   -0.113105
   H     0.940303   -4.574871   -2.116221
   N     0.255654    0.490874    0.420793
   N    -0.255738   -0.490758   -0.420843
          24
Simulation Time: t =  210.00
   C    -1.713755    3.314185   -0.998531
   C    -1.730857    4.158907    0.134588
   C    -0.973553    3.841284    1.305923
   C    -0.226465    2.668017    1.342300
   C    -0.293199    1.748798    0.248146
   C    -1.006564    2.113941   -0.931399
   C     0.226523   -2.668321   -1.342370
   C     0.293430   -1.748845   -0.247890
   C     1.006642   -2.114096    0.931183
   C     1.713757   -3.313907    0.998572
   C     1.730709   -4.159051   -0.134775
   C     0.973482   -3.841093   -1.305705
   H    -2.274296    3.617953   -1.889476
   H    -2.309278    5.074904    0.111607
   H    -0.969600    4.552392    2.133702
   H     0.473969    2.466882    2.161915
   H    -1.130956    1.333625   -1.701408
   H    -0.473712   -2.466772   -2.161985
   H     1.130392   -1.334114    1.701698
   H     2.274261   -3.617974    1.889422
   H     2.309241   -5.074951   -0.111519
   H     0.969617   -4.552075   -2.133511
   N     0.251182    0.485966    0.428245
   N    -0.251284   -0.485802   -0.428313
          24
Simulation Time: t =  212.00
   C    -1.700290    3.318307   -1.002188
   C    -1.726305    4.159866    0.133491
   C    -0.987491    3.833827    1.310369
   C    -0.238025    2.663254    1.353316
   C    -0.293889    1.746431    0.257246
   C    -0.995815    2.118395   -0.930834
   C     0.238090   -2.663607   -1.353386
   C     0.294085   -1.746401   -0.257024
   C     0.995935   -2.118564    0.930645
   C     1.700300   -3.318042    1.002240
   C     1.726157   -4.159990   -0.133634
   C     0.987382   -3.833598   -1.310194
   H    -2.229593    3.631654   -1.902756
   H    -2.303524    5.075167    0.109794
   H    -0.998464    4.530722    2.153614
   H     0.432489    2.449552    2.187754
   H    -1.088770    1.355411   -1.716289
   H    -0.432132   -2.449528   -2.187887
   H     1.088064   -1.355945    1.716648
   H     2.229495   -3.631528    1.902678
   H     2.303440   -5.075234   -0.109832
   H     0.998473   -4.530363   -2.153424
   N     0.246391    0.481221    0.436034
   N    -0.246469   -0.481109   -0.436094
          24
Simulation Time: t =  214.00
   C    -1.686508    3.322665   -1.004959
   C    -1.721396    4.160359    0.132441
   C    -1.001558    3.826245    1.314010
   C    -0.249307    2.658634    1.364091
   C    -0.294549    1.743300    0.266705
   C    -0.985594    2.122556   -0.930588
   C     0.249342   -2.659002   -1.364176
   C     0.294711   -1.743173   -0.266410
   C     0.985713   -2.122711    0.930385
   C     1.686516   -3.322363    1.005040
   C     1.721195   -4.160477   -0.132676
   C     1.001510   -3.826054   -1.313801
   H    -2.186303    3.644460   -1.918070
   H    -2.300233    5.079892    0.107767
   H    -1.027051    4.509905    2.175097
   H     0.390045    2.431004    2.216710
   H    -1.045070    1.378557   -1.733050
   H    -0.389644   -2.431118   -2.216900
   H     1.044257   -1.379173    1.733410
   H     2.186179   -3.644200    1.918004
   H     2.300063   -5.079988   -0.107921
   H     1.027040   -4.509553   -2.174948
   N     0.241274    0.476726    0.444135
   N    -0.241287   -0.476693   -0.444195
          24
Simulation Time: t =  216.00
   C    -1.672343    3.327190   -1.006927
   C    -1.716247    4.160583    0.131551
   C    -1.015795    3.818737    1.317077
   C    -0.260352    2.654014    1.374602
   C    -0.295263    1.739436    0.276230
   C    -0.975676    2.126386   -0.930439
   C     0.260394   -2.654413   -1.374670
   C     0.295379   -1.739233   -0.276004
   C     0.975837   -2.126553    0.930303
   C     1.672359   -3.326903    1.006991
   C     1.716059   -4.160672   -0.131709
   C     1.015702   -3.818515   -1.316946
   H    -2.145039    3.656641   -1.935547
   H    -2.298507    5.087790    0.105466
   H    -1.055464    4.489207    2.196213
   H     0.347300    2.411377    2.249000
   H    -1.000287    1.402272   -1.751917
   H    -0.346814   -2.411605   -2.249269
   H     0.999356   -1.402950    1.752305
   H     2.144896   -3.656248    1.935549
   H     2.298249   -5.087926   -0.105746
   H     1.055443   -4.488853   -2.196084
   N     0.235784    0.472503    0.452514
   N    -0.235766   -0.472530   -0.452562
          24
Simulation Time: t =  218.00
   C    -1.657821    3.331885   -1.008303
   C    -1.711137    4.160825    0.130684
   C    -1.030006    3.811307    1.320014
   C    -0.271216    2.649388    1.384945
   C    -0.296054    1.734784    0.285730
   C    -0.965940    2.129871   -0.930334
   C     0.271243   -2.649667   -1.384926
   C     0.296213   -1.734703   -0.285544
   C     0.966063   -2.129997    0.930200
   C     1.657844   -3.331655    1.008307
   C     1.710932   -4.160870   -0.130815
   C     1.029965   -3.811167   -1.319882
   H    -2.105613    3.668109   -1.954068
   H    -2.296827    5.096492    0.102916
   H    -1.083871    4.467803    2.214907
   H     0.304036    2.391081    2.283682
   H    -0.954763    1.426177   -1.772608
   H    -0.303495   -2.391416   -2.284037
   H     0.953760   -1.426916    1.772975
   H     2.105488   -3.667572    1.954156
   H     2.296486   -5.096664   -0.103314
   H     1.083801   -4.467486   -2.214788
   N     0.229896    0.468623    0.461115
   N    -0.229898   -0.468595   -0.461167
          24
Simulation Time: t =  220.00
   C    -1.643014    3.336764   -1.009408
   C    -1.706243    4.161374    0.129942
   C    -1.044194    3.804086    1.323017
   C    -0.281860    2.644557    1.395247
   C    -0.297092    1.729569    0.294940
   C    -0.956133    2.132865   -0.930096
   C     0.281883   -2.644725   -1.395120
   C     0.297280   -1.729638   -0.294877
   C     0.956256   -2.132979    0.930026
   C     1.643038   -3.336594    1.009319
   C     1.706071   -4.161381   -0.129941
   C     1.044135   -3.803974   -1.322953
   H    -2.067406    3.678456   -1.971585
   H    -2.293613    5.103571    0.100172
   H    -1.112334    4.445343    2.229675
   H     0.259519    2.370797    2.318849
   H    -0.908801    1.450479   -1.794115
   H    -0.258901   -2.371233   -2.319276
   H     0.907777   -1.451264    1.794459
   H     2.067343   -3.677797    1.971768
   H     2.293192   -5.103757   -0.100673
   H     1.112212   -4.445116   -2.229600
   N     0.223614    0.464963    0.469884
   N    -0.223650   -0.464860   -0.469943
          24
Simulation Time: t =  222.00
   C    -1.627966    3.341788   -1.010583
   C    -1.701744    4.162479    0.129357
   C    -1.058258    3.797039    1.326287
   C    -0.292280    2.639427    1.405685
   C    -0.298504    1.723988    0.303669
   C    -0.946084    2.135276   -0.929688
   C     0.292314   -2.639503   -1.405441
   C     0.298632   -1.724095   -0.303813
   C     0.946269   -2.135421    0.929730
   C     1.627972   -3.341667    1.010391
   C     1.701616   -4.162424   -0.129167
   C     1.058151   -3.796914   -1.326342
   H    -2.029806    3.687282   -1.986029
   H    -2.287828    5.107347    0.097274
   H    -1.140940    4.422141    2.239950
   H     0.212986    2.351308    2.352300
   H    -0.862929    1.475594   -1.814863
   H    -0.212310   -2.351823   -2.352729
   H     0.861853   -1.476420    1.815217
   H     2.029813   -3.686517    1.986286
   H     2.287309   -5.107566   -0.097832
   H     1.140759   -4.422005   -2.239941
   N     0.216960    0.461410    0.478772
   N    -0.216982   -0.461338   -0.478819
          24
Simulation Time: t =  224.00
   C    -1.612689    3.346919   -1.012041
   C    -1.697731    4.164222    0.128892
   C    -1.072077    3.790051    1.329970
   C    -0.302544    2.633926    1.416337
   C    -0.300364    1.718229    0.311847
   C    -0.935672    2.137051   -0.929143
   C     0.302597   -2.633940   -1.416013
   C     0.300345   -1.718229   -0.312186
   C     0.935946   -2.137261    0.929314
   C     1.612658   -3.346810    1.011754
   C     1.697632   -4.164091   -0.128540
   C     1.071927   -3.789904   -1.330129
   H    -1.992592    3.694409   -1.996066
   H    -2.279267    5.107425    0.094237
   H    -1.169830    4.399077    2.246098
   H     0.164135    2.333219    2.382160
   H    -0.817606    1.502009   -1.833140
   H    -0.163426   -2.333806   -2.382535
   H     0.816475   -1.502881    1.833496
   H     1.992673   -3.693573    1.996327
   H     2.278634   -5.107681   -0.094797
   H     1.169555   -4.399075   -2.246159
   N     0.209940    0.457854    0.487694
   N    -0.209875   -0.457930   -0.487720
          24
Simulation Time: t =  226.00
   C    -1.597111    3.352061   -1.013849
   C    -1.694174    4.166516    0.128545
   C    -1.085588    3.783001    1.334082
   C    -0.312773    2.628012    1.427214
   C    -0.302654    1.712366    0.319407
   C    -0.924823    2.138206   -0.928511
   C     0.312861   -2.627985   -1.426816
   C     0.302548   -1.712347   -0.319969
   C     0.925178   -2.138490    0.928817
   C     1.597053   -3.351961    1.013486
   C     1.694134   -4.166342   -0.128013
   C     1.085352   -3.782792   -1.334358
   H    -1.955975    3.700106   -2.001465
   H    -2.268519    5.104819    0.091072
   H    -1.199138    4.377514    2.249332
   H     0.113263    2.316849    2.407377
   H    -0.773400    1.529884   -1.847412
   H    -0.112515   -2.317457   -2.407621
   H     0.772236   -1.530785    1.847797
   H     1.956112   -3.699205    2.001638
   H     2.267789   -5.105072   -0.091570
   H     1.198807   -4.377638   -2.249476
   N     0.202496    0.454273    0.496552
   N    -0.202403   -0.454411   -0.496558
          24
Simulation Time: t =  228.00
   C    -1.581162    3.357099   -1.015899
   C    -1.691028    4.169158    0.128131
   C    -1.098638    3.775672    1.338660
   C    -0.323142    2.621714    1.438226
   C    -0.305312    1.706463    0.326491
   C    -0.913536    2.138910   -0.927890
   C     0.323248   -2.621566   -1.437755
   C     0.305286   -1.706689   -0.327109
   C     0.913864   -2.139179    0.928192
   C     1.581074   -3.357034    1.015501
   C     1.691007   -4.168965   -0.127580
   C     1.098412   -3.775506   -1.338917
   H    -1.920583    3.704997   -2.003114
   H    -2.256852    5.101648    0.087724
   H    -1.229133    4.358897    2.251479
   H     0.061151    2.302088    2.427857
   H    -0.730629    1.558807   -1.856986
   H    -0.060406   -2.302708   -2.427892
   H     0.729628   -1.559644    1.857379
   H     1.920776   -3.704047    2.003110
   H     2.256164   -5.101861   -0.088144
   H     1.228692   -4.359161   -2.251649
   N     0.194590    0.450624    0.505226
   N    -0.194567   -0.450618   -0.505252
          24
Simulation Time: t =  230.00
   C    -1.564715    3.361967   -1.017978
   C    -1.688141    4.171869    0.127639
   C    -1.111279    3.768080    1.343529
   C    -0.333815    2.614878    1.449134
   C    -0.308492    1.700955    0.333110
   C    -0.901749    2.139293   -0.927161
   C     0.333969   -2.614750   -1.448670
   C     0.308429   -1.701166   -0.333787
   C     0.902073   -2.139571    0.927478
   C     1.564626   -3.361930    1.017581
   C     1.688139   -4.171651   -0.127058
   C     1.111006   -3.767849   -1.343793
   H    -1.887244    3.709988   -2.002792
   H    -2.245955    5.100501    0.084171
   H    -1.259866    4.344478    2.254235
   H     0.009058    2.288536    2.444433
   H    -0.689671    1.587664   -1.862016
   H    -0.008346   -2.289099   -2.444257
   H     0.688753   -1.588485    1.862437
   H     1.887485   -3.709038    2.002559
   H     2.245215   -5.100692   -0.084399
   H     1.259329   -4.344819   -2.254417
   N     0.186340    0.446585    0.513630
   N    -0.186294   -0.446622   -0.513649
          24
Simulation Time: t =  232.00
   C    -1.547731    3.366689   -1.019736
   C    -1.685399    4.174343    0.126849
   C    -1.123456    3.760141    1.348655
   C    -0.344997    2.607508    1.459651
   C    -0.312114    1.695983    0.339481
   C    -0.889491    2.139571   -0.926289
   C     0.345233   -2.607541   -1.459353
   C     0.311935   -1.695916   -0.340051
   C     0.889846   -2.139938    0.926612
   C     1.547584   -3.366483    1.019486
   C     1.685383   -4.174142   -0.126468
   C     1.123148   -3.759847   -1.348855
   H    -1.856784    3.715989   -2.002644
   H    -2.237136    5.103428    0.080313
   H    -1.291321    4.334733    2.258651
   H    -0.041604    2.275405    2.458742
   H    -0.650452    1.615040   -1.863489
   H     0.042218   -2.275878   -2.458367
   H     0.649675   -1.615838    1.863895
   H     1.857055   -3.715137    2.002204
   H     2.236390   -5.103622   -0.080318
   H     1.290642   -4.335138   -2.258793
   N     0.177730    0.442075    0.521683
   N    -0.177584   -0.442317   -0.521682
          24
Simulation Time: t =  234.00
   C    -1.530100    3.371053   -1.021057
   C    -1.682691    4.176429    0.125873
   C    -1.135221    3.751902    1.353972
   C    -0.356886    2.599749    1.469678
   C    -0.316002    1.691299    0.345637
   C    -0.876918    2.140098   -0.925213
   C     0.357175   -2.599842   -1.469447
   C     0.315929   -1.691375   -0.346065
   C     0.877182   -2.140437    0.925434
   C     1.529947   -3.370819    1.020901
   C     1.682671   -4.176255   -0.125647
   C     1.134909   -3.751580   -1.354075
   H    -1.829626    3.723673   -2.004417
   H    -2.230787    5.111167    0.076037
   H    -1.323108    4.329332    2.264693
   H    -0.089504    2.261838    2.472567
   H    -0.612706    1.639373   -1.862840
   H     0.089985   -2.262151   -2.472080
   H     0.612212   -1.640119    1.863212
   H     1.829991   -3.722932    2.003837
   H     2.230088   -5.111338   -0.075799
   H     1.322276   -4.329696   -2.264711
   N     0.168661    0.437238    0.529265
   N    -0.168572   -0.437368   -0.529293
          24
Simulation Time: t =  236.00
   C    -1.511920    3.375168   -1.021847
   C    -1.679989    4.178111    0.124708
   C    -1.146662    3.743498    1.359431
   C    -0.369573    2.591610    1.479060
   C    -0.320240    1.687206    0.351632
   C    -0.863994    2.141021   -0.923770
   C     0.369928   -2.591747   -1.478920
   C     0.320248   -1.687392   -0.351845
   C     0.864175   -2.141323    0.923864
   C     1.511715   -3.374863    1.021794
   C     1.679948   -4.177959   -0.124732
   C     1.146386   -3.743203   -1.359382
   H    -1.805690    3.733106   -2.008605
   H    -2.226375    5.122556    0.071350
   H    -1.354734    4.326928    2.271371
   H    -0.133800    2.247098    2.487109
   H    -0.576208    1.659302   -1.861498
   H     0.134045   -2.247235   -2.486632
   H     0.576080   -1.659953    1.861785
   H     1.806175   -3.732538    2.008022
   H     2.225791   -5.122674   -0.070879
   H     1.353656   -4.327274   -2.271184
   N     0.159224    0.431825    0.536354
   N    -0.159166   -0.431885   -0.536408
          24
Simulation Time: t =  238.00
   C    -1.493236    3.379079   -1.022273
   C    -1.677273    4.179490    0.123686
   C    -1.158028    3.735265    1.364846
   C    -0.383081    2.583061    1.487873
   C    -0.324904    1.683858    0.357289
   C    -0.850691    2.142393   -0.921752
   C     0.383568   -2.583395   -1.487877
   C     0.324786   -1.683737   -0.357430
   C     0.850873   -2.142794    0.921870
   C     1.493014   -3.378650    1.022288
   C     1.677226   -4.179325   -0.123784
   C     1.157662   -3.734844   -1.364803
   H    -1.784312    3.743808   -2.014304
   H    -2.222665    5.135100    0.066388
   H    -1.385227    4.325880    2.277094
   H    -0.174055    2.230912    2.502467
   H    -0.541056    1.673879   -1.860246
   H     0.173995   -2.230879   -2.502092
   H     0.541053   -1.674552    1.860449
   H     1.784950   -3.743468    2.013844
   H     2.221994   -5.135281   -0.065645
   H     1.383995   -4.326126   -2.276708
   N     0.149501    0.425761    0.542975
   N    -0.149334   -0.426054   -0.543006
          24
Simulation Time: t =  240.00
   C    -1.474238    3.382904   -1.022508
   C    -1.674571    4.180643    0.122810
   C    -1.169369    3.727307    1.370311
   C    -0.397490    2.574271    1.496344
   C    -0.329738    1.680769    0.362704
   C    -0.837027    2.144322   -0.919293
   C     0.398056   -2.574628   -1.496412
   C     0.329703   -1.680774   -0.362665
   C     0.837157   -2.144741    0.919313
   C     1.473947   -3.382369    1.022588
   C     1.674515   -4.180499   -0.123097
   C     1.169020   -3.726916   -1.370156
   H    -1.764571    3.754939   -2.019759
   H    -2.217984    5.146071    0.061270
   H    -1.413795    4.324396    2.280280
   H    -0.210211    2.213417    2.517698
   H    -0.507262    1.683032   -1.858915
   H     0.209819   -2.213233   -2.517474
   H     0.507585   -1.683583    1.859064
   H     1.765352   -3.754837    2.019508
   H     2.217421   -5.146187   -0.060350
   H     1.412346   -4.324607   -2.279739
   N     0.139350    0.419405    0.549036
   N    -0.139228   -0.419610   -0.549097
          24
Simulation Time: t =  242.00
   C    -1.455000    3.386737   -1.022733
   C    -1.671882    4.181678    0.122282
   C    -1.180869    3.719937    1.375749
   C    -0.412820    2.565163    1.504604
   C    -0.334732    1.677989    0.367879
   C    -0.822954    2.146750   -0.916514
   C     0.413425   -2.565500   -1.504699
   C     0.334805   -1.678203   -0.367717
   C     0.822993   -2.147134    0.916433
   C     1.454704   -3.386210    1.022807
   C     1.671824   -4.181526   -0.122630
   C     1.180524   -3.719547   -1.375500
   H    -1.745533    3.765583   -2.023182
   H    -2.211343    5.153118    0.056250
   H    -1.439681    4.321179    2.279899
   H    -0.242266    2.195066    2.531298
   H    -0.475505    1.687116   -1.856459
   H     0.241604   -2.194766   -2.531219
   H     0.476161   -1.687535    1.856544
   H     1.746456   -3.765672    2.023122
   H     2.210813   -5.153195   -0.055197
   H     1.438105   -4.321388   -2.279321
   N     0.128844    0.412761    0.554571
   N    -0.128774   -0.412840   -0.554664
          24
Simulation Time: t =  244.00
   C    -1.435681    3.390844   -1.022887
   C    -1.669199    4.182546    0.121885
   C    -1.192588    3.713249    1.381201
   C    -0.429036    2.555607    1.512644
   C    -0.339902    1.675682    0.373107
   C    -0.808423    2.149576   -0.913688
   C     0.429751   -2.556051   -1.512909
   C     0.339899   -1.675666   -0.372727
   C     0.808415   -2.150030    0.913528
   C     1.435355   -3.390188    1.023065
   C     1.669112   -4.182375   -0.122421
   C     1.192225   -3.712851   -1.380855
   H    -1.726524    3.774976   -2.023332
   H    -2.202174    5.155280    0.051502
   H    -1.462521    4.315647    2.276003
   H    -0.270403    2.176399    2.541771
   H    -0.446438    1.687027   -1.851498
   H     0.269454   -2.176098   -2.541799
   H     0.447408   -1.687212    1.851559
   H     1.727421   -3.775190    2.023356
   H     2.201658   -5.155280   -0.050387
   H     1.460793   -4.315901   -2.275422
   N     0.118082    0.405792    0.559623
   N    -0.117924   -0.406061   -0.559700
          24
Simulation Time: t =  246.00
   C    -1.416344    3.395188   -1.023010
   C    -1.666398    4.183083    0.121665
   C    -1.204498    3.707256    1.386559
   C    -0.446221    2.545670    1.520616
   C    -0.345014    1.673436    0.378518
   C    -0.793470    2.152869   -0.911067
   C     0.446990   -2.546182   -1.521007
   C     0.345047   -1.673417   -0.377943
   C     0.793373   -2.153329    0.910825
   C     1.416034   -3.394499    1.023266
   C     1.666301   -4.182911   -0.122293
   C     1.204118   -3.706824   -1.386154
   H    -1.706966    3.782720   -2.019867
   H    -2.190877    5.152898    0.047113
   H    -1.482386    4.308047    2.269891
   H    -0.294642    2.158038    2.548203
   H    -0.420685    1.683512   -1.843133
   H     0.293556   -2.157797   -2.548242
   H     0.421957   -1.683459    1.843159
   H     1.707764   -3.782946    2.019866
   H     2.190336   -5.152868   -0.046033
   H     1.480621   -4.308335   -2.269375
   N     0.106964    0.398883    0.564180
   N    -0.106799   -0.399162   -0.564273
          24
Simulation Time: t =  248.00
   C    -1.397087    3.399816   -1.023049
   C    -1.663342    4.183069    0.121537
   C    -1.216515    3.701771    1.391717
   C    -0.464377    2.535477    1.528565
   C    -0.350027    1.671103    0.384247
   C    -0.778110    2.156621   -0.908807
   C     0.465167   -2.535891   -1.529001
   C     0.350208   -1.671368   -0.383416
   C     0.777876   -2.157002    0.908390
   C     1.396764   -3.399146    1.023352
   C     1.663228   -4.182878   -0.122335
   C     1.216198   -3.701455   -1.391154
   H    -1.686591    3.788812   -2.013555
   H    -2.178309    5.147807    0.043066
   H    -1.499810    4.299335    2.263871
   H    -0.315304    2.140291    2.550550
   H    -0.398417    1.677340   -1.831185
   H     0.314099   -2.140216   -2.550566
   H     0.400217   -1.676891    1.831161
   H     1.687219   -3.788956    2.013452
   H     2.177879   -5.147616   -0.042129
   H     1.497881   -4.299785   -2.263426
   N     0.095525    0.392226    0.568325
   N    -0.095428   -0.392336   -0.568454
          24
Simulation Time: t =  250.00
   C    -1.377901    3.404744   -1.022937
   C    -1.659842    4.182252    0.121818
   C    -1.228681    3.696830    1.396246
   C    -0.483478    2.525018    1.536445
   C    -0.355077    1.668920    0.390054
   C    -0.762246    2.160626   -0.906708
   C     0.484335   -2.525426   -1.536903
   C     0.355225   -1.669155   -0.389223
   C     0.761961   -2.161090    0.906316
   C     1.377608   -3.404062    1.023214
   C     1.659712   -4.182002   -0.122527
   C     1.228312   -3.696472   -1.395728
   H    -1.665477    3.793673   -2.006180
   H    -2.166116    5.142299    0.039312
   H    -1.515385    4.291015    2.260534
   H    -0.332570    2.123200    2.549853
   H    -0.380045    1.668735   -1.816287
   H     0.331254   -2.123388   -2.549817
   H     0.382203   -1.667938    1.816205
   H     1.665876   -3.793699    2.005941
   H     2.165679   -5.142064   -0.038600
   H     1.513429   -4.291546   -2.260143
   N     0.083877    0.385764    0.572202
   N    -0.083733   -0.385942   -0.572318
          24
Simulation Time: t =  252.00
   C    -1.358845    3.409956   -1.022557
   C    -1.655744    4.180411    0.122557
   C    -1.240892    3.692236    1.400014
   C    -0.503522    2.514502    1.544166
   C    -0.360113    1.666674    0.395894
   C    -0.745879    2.164828   -0.904650
   C     0.504503   -2.514904   -1.544625
   C     0.360187   -1.666806   -0.395133
   C     0.745613   -2.165478    0.904366
   C     1.358513   -3.409161    1.022782
   C     1.655606   -4.180107   -0.123158
   C     1.240451   -3.691826   -1.399595
   H    -1.643920    3.798075   -2.000006
   H    -2.155549    5.138807    0.035714
   H    -1.529891    4.284231    2.261837
   H    -0.346736    2.106486    2.547940
   H    -0.365226    1.657859   -1.799829
   H     0.345201   -2.107055   -2.547835
   H     0.367734   -1.656657    1.799686
   H     1.644039   -3.797938    1.999667
   H     2.155144   -5.138493   -0.035294
   H     1.527831   -4.284899   -2.261448
   N     0.071990    0.379722    0.575886
   N    -0.071784   -0.380030   -0.575969
          24
Simulation Time: t =  254.00
   C    -1.339829    3.415199   -1.021903
   C    -1.650999    4.177509    0.123952
   C    -1.253105    3.687918    1.402971
   C    -0.524524    2.504123    1.551727
   C    -0.365055    1.664088    0.401574
   C    -0.729103    2.169283   -0.902462
   C     0.525593   -2.504399   -1.551986
   C     0.365158   -1.664446   -0.401053
   C     0.728823   -2.170063    0.902290
   C     1.339517   -3.414453    1.021922
   C     1.650855   -4.177111   -0.124221
   C     1.252570   -3.687431   -1.402723
   H    -1.622165    3.802846   -1.996995
   H    -2.147387    5.138607    0.032234
   H    -1.543648    4.279484    2.268363
   H    -0.358007    2.089923    2.546730
   H    -0.353512    1.644602   -1.783615
   H     0.356297   -2.090871   -2.546643
   H     0.356388   -1.642998    1.783414
   H     1.622039   -3.802510    1.996591
   H     2.147010   -5.138234   -0.032165
   H     1.541514   -4.280266   -2.267928
   N     0.059832    0.374368    0.579467
   N    -0.059642   -0.374597   -0.579543
          24
Simulation Time: t =  256.00
   C    -1.320908    3.420517   -1.020848
   C    -1.645660    4.173651    0.125724
   C    -1.265252    3.683785    1.405381
   C    -0.546395    2.493851    1.558899
   C    -0.369981    1.661350    0.407190
   C    -0.711959    2.173950   -0.899988
   C     0.547574   -2.494026   -1.558982
   C     0.370130   -1.661965   -0.406823
   C     0.711682   -2.174877    0.899900
   C     1.320557   -3.419724    1.020711
   C     1.645518   -4.173180   -0.125801
   C     1.264635   -3.683262   -1.405244
   H    -1.600372    3.808483   -1.997977
   H    -2.141441    5.141361    0.029015
   H    -1.556707    4.276250    2.279082
   H    -0.366769    2.073425    2.547688
   H    -0.344301    1.629037   -1.769344
   H     0.364876   -2.074772   -2.547618
   H     0.347654   -1.627008    1.769064
   H     1.599977   -3.807965    1.997599
   H     2.141173   -5.140923   -0.029313
   H     1.554425   -4.277150   -2.278591
   N     0.047466    0.369614    0.583004
   N    -0.047309   -0.369728   -0.583080
          24
Simulation Time: t =  258.00
   C    -1.302039    3.425795   -1.019458
   C    -1.639911    4.169168    0.127735
   C    -1.277316    3.679860    1.407589
   C    -0.569043    2.483636    1.565603
   C    -0.374955    1.658602    0.412732
   C    -0.694555    2.178840   -0.897145
   C     0.570384   -2.483859   -1.565585
   C     0.375042   -1.659207   -0.412516
   C     0.694291   -2.179966    0.897171
   C     1.301652   -3.424898    1.019228
   C     1.639764   -4.168628   -0.127648
   C     1.276574   -3.679195   -1.407599
   H    -1.578331    3.815074   -2.002478
   H    -2.136851    5.145256    0.026282
   H    -1.568586    4.273443    2.291712
   H    -0.373546    2.057296    2.551307
   H    -0.337254    1.611530   -1.758016
   H     0.371473   -2.059042   -2.551281
   H     0.341052   -1.609127    1.757663
   H     1.577668   -3.814406    2.002185
   H     2.136598   -5.144792   -0.026928
   H     1.566198   -4.274428   -2.291178
   N     0.034970    0.365362    0.586575
   N    -0.034760   -0.365546   -0.586614
          24
Simulation Time: t =  260.00
   C    -1.283252    3.430952   -1.017886
   C    -1.633967    4.164495    0.129720
   C    -1.289208    3.676032    1.410083
   C    -0.592370    2.473498    1.571862
   C    -0.379950    1.655802    0.418257
   C    -0.676962    2.183969   -0.893999
   C     0.593888   -2.473800   -1.571786
   C     0.379950   -1.656324   -0.418103
   C     0.676694   -2.185248    0.894077
   C     1.282807   -3.429931    1.017620
   C     1.633798   -4.163870   -0.129633
   C     1.288372   -3.675259   -1.410136
   H    -1.555590    3.822314   -2.008913
   H    -2.132349    5.147848    0.024255
   H    -1.579002    4.269787    2.303632
   H    -0.379098    2.042152    2.557131
   H    -0.332194    1.593043   -1.749691
   H     0.376849   -2.044293   -2.557152
   H     0.336536   -1.590332    1.749205
   H     1.554663   -3.821501    2.008725
   H     2.132138   -5.147350   -0.025214
   H     1.576471   -4.270856   -2.303069
   N     0.022314    0.361570    0.590174
   N    -0.022029   -0.361898   -0.590158
          24
Simulation Time: t =  262.00
   C    -1.264561    3.435976   -1.016382
   C    -1.628013    4.160003    0.131661
   C    -1.300928    3.672275    1.413092
   C    -0.616227    2.463379    1.577812
   C    -0.384982    1.652936    0.423665
   C    -0.659208    2.189180   -0.890571
   C     0.617925   -2.463793   -1.577671
   C     0.384940   -1.653498   -0.423523
   C     0.658930   -2.190595    0.890667
   C     1.264054   -3.434815    1.016101
   C     1.627836   -4.159319   -0.131600
   C     1.299981   -3.671379   -1.413192
   H    -1.531562    3.829649   -2.015107
   H    -2.126836    5.147071    0.023112
   H    -1.587709    4.264525    2.312767
   H    -0.384429    2.028858    2.563943
   H    -0.329304    1.575060   -1.743502
   H     0.382045   -2.031368   -2.563951
   H     0.334219   -1.572133    1.742874
   H     1.530373   -3.828683    2.015040
   H     2.126661   -5.146529   -0.024317
   H     1.585021   -4.265619   -2.312155
   N     0.009515    0.358207    0.593770
   N    -0.009187   -0.358566   -0.593728
          24
Simulation Time: t =  264.00
   C    -1.245973    3.440818   -1.015260
   C    -1.622186    4.156006    0.133652
   C    -1.312440    3.668513    1.416710
   C    -0.640460    2.453282    1.583720
   C    -0.390059    1.650013    0.428721
   C    -0.641290    2.194298   -0.886866
   C     0.642315   -2.453741   -1.583409
   C     0.390049   -1.650798   -0.428685
   C     0.640999   -2.195833    0.886981
   C     1.245425   -3.439561    1.014888
   C     1.622002   -4.155256   -0.133521
   C     1.311364   -3.667484   -1.416869
   H    -1.505791    3.836485   -2.019033
   H    -2.119880    5.141883    0.022905
   H    -1.594923    4.257452    2.318115
   H    -0.390555    2.018366    2.570220
   H    -0.328809    1.559125   -1.738280
   H     0.388144   -2.021192   -2.570171
   H     0.334246   -1.556137    1.737490
   H     1.504340   -3.835393    2.019072
   H     2.119702   -5.141288   -0.024282
   H     1.592096   -4.258544   -2.317486
   N    -0.003430    0.355175    0.597346
   N     0.003750   -0.355449   -0.597295
          24
Simulation Time: t =  266.00
   C    -1.227513    3.445545   -1.014647
   C    -1.616548    4.152625    0.135673
   C    -1.323703    3.664637    1.420913
   C    -0.664881    2.443128    1.589714
   C    -0.395322    1.647283    0.433273
   C    -0.623198    2.199094   -0.882861
   C     0.666891   -2.443629   -1.589220
   C     0.395264   -1.648136   -0.433445
   C     0.622956   -2.200813    0.883057
   C     1.226911   -3.444123    1.014157
   C     1.616334   -4.151791   -0.135449
   C     1.322491   -3.663471   -1.421141
   H    -1.478080    3.842519   -2.019483
   H    -2.111597    5.132787    0.023551
   H    -1.601106    4.249121    2.319836
   H    -0.398577    2.011286    2.574852
   H    -0.330678    1.546700   -1.732920
   H     0.396155   -2.014414   -2.574676
   H     0.336497   -1.543848    1.731947
   H     1.476354   -3.841346    2.019589
   H     2.111415   -5.132117   -0.025008
   H     1.598143   -4.250191   -2.319255
   N    -0.016423    0.352187    0.600841
   N     0.016801   -0.352522   -0.600748
          24
Simulation Time: t =  268.00
   C    -1.209156    3.450081   -1.014482
   C    -1.611050    4.149799    0.137746
   C    -1.334684    3.660570    1.425579
   C    -0.689335    2.432865    1.595799
   C    -0.400814    1.644867    0.437280
   C    -0.604980    2.203446   -0.878620
   C     0.691527   -2.433532   -1.595189
   C     0.400605   -1.645515   -0.437742
   C     0.604860   -2.205417    0.878984
   C     1.208494   -3.448462    1.013905
   C     1.610799   -4.148883   -0.137366
   C     1.333284   -3.659151   -1.425957
   H    -1.448552    3.847935   -2.016514
   H    -2.102898    5.121642    0.024860
   H    -1.607079    4.240584    2.319034
   H    -0.409157    2.007756    2.577634
   H    -0.334675    1.538858   -1.726652
   H     0.406793   -2.011161   -2.577225
   H     0.340695   -1.536309    1.725575
   H     1.446536   -3.846689    2.016589
   H     2.102712   -5.120844   -0.026286
   H     1.603997   -4.241556   -2.318540
   N    -0.029447    0.349124    0.604199
   N     0.029949   -0.349711   -0.604037
          24
Simulation Time: t =  270.00
   C    -1.190872    3.454345   -1.014487
   C    -1.605587    4.147339    0.139612
   C    -1.345272    3.656064    1.430759
   C    -0.713743    2.422596    1.601860
   C    -0.406465    1.642578    0.441007
   C    -0.586793    2.207418   -0.874385
   C     0.716062   -2.423376   -1.601179
   C     0.406216   -1.643266   -0.441524
   C     0.586748   -2.209501    0.874728
   C     1.190147   -3.452546    1.013916
   C     1.605308   -4.146371   -0.139304
   C     1.343744   -3.654512   -1.431103
   H    -1.417599    3.853360   -2.011406
   H    -2.095039    5.111170    0.026537
   H    -1.613670    4.233219    2.317343
   H    -0.422729    2.007266    2.579294
   H    -0.340080    1.536056   -1.719453
   H     0.420503   -2.010917   -2.578565
   H     0.346171   -1.533955    1.718329
   H     1.415327   -3.852007    2.011303
   H     2.094842   -5.110269   -0.027836
   H     1.610513   -4.234043   -2.316985
   N    -0.042542    0.346061    0.607274
   N     0.043103   -0.346712   -0.607085
          24
Simulation Time: t =  272.00
   C    -1.172594    3.458189   -1.014354
   C    -1.600046    4.145042    0.141245
   C    -1.355485    3.651070    1.436277
   C    -0.737991    2.412340    1.607722
   C    -0.412309    1.640453    0.444554
   C    -0.568763    2.211094   -0.870205
   C     0.740403   -2.413199   -1.607008
   C     0.412101   -1.641367   -0.444971
   C     0.568751   -2.213116    0.870354
   C     1.171858   -3.456345    1.013824
   C     1.599744   -4.144035   -0.141086
   C     1.353836   -3.649435   -1.436468
   H    -1.385820    3.859624   -2.006067
   H    -2.089199    5.104124    0.028321
   H    -1.621644    4.228427    2.316605
   H    -0.439273    2.008959    2.581188
   H    -0.345973    1.537849   -1.712080
   H     0.437319   -2.012740   -2.580134
   H     0.351947   -1.536327    1.711005
   H     1.383300   -3.858166    2.005695
   H     2.088981   -5.103068   -0.029383
   H     1.618452   -4.229006   -2.316364
   N    -0.055675    0.342917    0.609964
   N     0.056238   -0.343485   -0.609777
          24
Simulation Time: t =  274.00
   C    -1.154383    3.461733   -1.013699
   C    -1.594344    4.142779    0.142512
   C    -1.365295    3.645574    1.441891
   C    -0.761982    2.402074    1.613153
   C    -0.418473    1.638764    0.448002
   C    -0.550952    2.214459   -0.865928
   C     0.764484   -2.403132   -1.612565
   C     0.418144   -1.639515   -0.448251
   C     0.551060   -2.216490    0.865932
   C     1.153564   -3.459710    1.013331
   C     1.594007   -4.141732   -0.142666
   C     1.363564   -3.643866   -1.441908
   H    -1.353747    3.867527   -2.002353
   H    -2.086041    5.101951    0.029993
   H    -1.631661    4.227053    2.318246
   H    -0.458730    2.011596    2.584923
   H    -0.351217    1.543012   -1.705967
   H     0.457020   -2.015440   -2.583597
   H     0.356836   -1.542243    1.704995
   H     1.351047   -3.866013    2.001739
   H     2.085867   -5.100776   -0.030747
   H     1.628385   -4.227301   -2.318048
   N    -0.068746    0.339424    0.612205
   N     0.069427   -0.340182   -0.611981
          24
Simulation Time: t =  276.00
   C    -1.136177    3.464876   -1.012421
   C    -1.588496    4.140577    0.143676
   C    -1.374800    3.639677    1.447290
   C    -0.785654    2.391929    1.618174
   C    -0.424868    1.637284    0.451206
   C    -0.533534    2.217682   -0.861385
   C     0.788183   -2.393135   -1.617637
   C     0.424439   -1.637840   -0.451479
   C     0.533779   -2.219706    0.861337
   C     1.135323   -3.462771    1.012106
   C     1.588105   -4.139482   -0.143926
   C     1.372987   -3.637874   -1.447242
   H    -1.321747    3.877535   -2.001419
   H    -2.085131    5.104407    0.031406
   H    -1.643872    4.229110    2.322568
   H    -0.480703    2.014007    2.591839
   H    -0.354613    1.549982   -1.702677
   H     0.479367   -2.017712   -2.590428
   H     0.359660   -1.550043    1.701895
   H     1.318949   -3.876079    2.000708
   H     2.085036   -5.103105   -0.031802
   H     1.640479   -4.228985   -2.322344
   N    -0.081774    0.335610    0.613893
   N     0.082569   -0.336589   -0.613617
          24
Simulation Time: t =  278.00
   C    -1.117971    3.467668   -1.010489
   C    -1.582586    4.138615    0.144813
   C    -1.384026    3.633436    1.452372
   C    -0.808991    2.382074    1.622827
   C    -0.431358    1.635641    0.454248
   C    -0.516682    2.220943   -0.856568
   C     0.811380   -2.383133   -1.622157
   C     0.431042   -1.636516   -0.454556
   C     0.516976   -2.222805    0.856370
   C     1.117208   -3.465647    1.010040
   C     1.582122   -4.137466   -0.145004
   C     1.382214   -3.631752   -1.452229
   H    -1.289872    3.889554   -2.003188
   H    -2.085491    5.109397    0.032495
   H    -1.658080    4.233610    2.328633
   H    -0.504972    2.015159    2.602503
   H    -0.355075    1.557409   -1.703282
   H     0.504196   -2.018478   -2.601238
   H     0.359436   -1.558313    1.702758
   H     1.287022   -3.888251    2.002547
   H     2.085339   -5.108056   -0.032521
   H     1.654551   -4.233071   -2.328328
   N    -0.094813    0.331627    0.614948
   N     0.095602   -0.332459   -0.614691
          24
Simulation Time: t =  280.00
   C    -1.099881    3.470343   -1.007896
   C    -1.576735    4.137116    0.146058
   C    -1.393148    3.627235    1.456925
   C    -0.831829    2.372314    1.627113
   C    -0.438085    1.634186    0.457012
   C    -0.500391    2.224159   -0.851319
   C     0.834038   -2.373268   -1.626326
   C     0.437781   -1.635039   -0.457540
   C     0.500817   -2.225942    0.851120
   C     1.099205   -3.468410    1.007279
   C     1.576169   -4.135896   -0.146025
   C     1.391342   -3.625618   -1.456823
   H    -1.257934    3.902848   -2.006233
   H    -2.085428    5.114297    0.033342
   H    -1.673637    4.238870    2.334667
   H    -0.531602    2.014454    2.616252
   H    -0.352044    1.564599   -1.707758
   H     0.531456   -2.017224   -2.615338
   H     0.355419   -1.566290    1.707645
   H     1.255072   -3.901730    2.005739
   H     2.085273   -5.112880   -0.032998
   H     1.669993   -4.237931   -2.334308
   N    -0.107731    0.327095    0.615390
   N     0.108593   -0.328036   -0.615101
          24
Simulation Time: t =  282.00
   C    -1.082032    3.473171   -1.004693
   C    -1.570995    4.136212    0.147254
   C    -1.402265    3.621293    1.461032
   C    -0.854031    2.362571    1.631137
   C    -0.445011    1.632729    0.459741
   C    -0.484720    2.227342   -0.845836
   C     0.856034   -2.363483   -1.630364
   C     0.444644   -1.633340   -0.460407
   C     0.485343   -2.229070    0.845644
   C     1.081379   -3.471247    1.004015
   C     1.570344   -4.134955   -0.147130
   C     1.400490   -3.619748   -1.460919
   H    -1.225618    3.916244   -2.008278
   H    -2.083610    5.116773    0.034051
   H    -1.689778    4.242962    2.338718
   H    -0.561051    2.011671    2.631378
   H    -0.345087    1.571640   -1.714956
   H     0.561635   -2.013796   -2.630884
   H     0.347157   -1.574073    1.715370
   H     1.222814   -3.915322    2.007933
   H     2.083455   -5.115260   -0.033347
   H     1.686132   -4.241714   -2.338483
   N    -0.120542    0.322094    0.615189
   N     0.121530   -0.323296   -0.614847
          24
Simulation Time: t =  284.00
   C    -1.064413    3.476181   -1.001034
   C    -1.565388    4.135941    0.148447
   C    -1.411499    3.615765    1.464763
   C    -0.875505    2.352902    1.635125
   C    -0.451984    1.630749    0.462688
   C    -0.469761    2.230592   -0.840530
   C     0.877247   -2.353653   -1.634380
   C     0.451732   -1.631639   -0.463159
   C     0.470486   -2.231989    0.840043
   C     1.063868   -3.474439    1.000336
   C     1.564688   -4.134709   -0.148334
   C     1.409764   -3.614414   -1.464469
   H    -1.192713    3.928633   -2.007246
   H    -2.079247    5.115647    0.034683
   H    -1.705877    4.244302    2.339268
   H    -0.593739    2.006831    2.645748
   H    -0.334085    1.579370   -1.722750
   H     0.595128   -2.008231   -2.645658
   H     0.334584   -1.582504    1.723707
   H     1.190005   -3.927878    2.006950
   H     2.078997   -5.114036   -0.033655
   H     1.702436   -4.242796   -2.339330
   N    -0.133344    0.316990    0.614300
   N     0.134325   -0.318045   -0.613990
          24
Simulation Time: t =  286.00
   C    -1.047166    3.479656   -0.996844
   C    -1.559882    4.136241    0.149534
   C    -1.420898    3.610819    1.468111
   C    -0.896170    2.343199    1.639047
   C    -0.459153    1.628523    0.465934
   C    -0.455423    2.233662   -0.835558
   C     0.897680   -2.343935   -1.638529
   C     0.458901   -1.629442   -0.466039
   C     0.456330   -2.234737    0.834744
   C     1.046639   -3.478016    0.996314
   C     1.559167   -4.135079   -0.149651
   C     1.419197   -3.609614   -1.467553
   H    -1.159202    3.939314   -2.002015
   H    -2.072217    5.111108    0.035221
   H    -1.721506    4.242057    2.335617
   H    -0.629956    1.999780    2.657617
   H    -0.319004    1.588903   -1.728737
   H     0.632187   -2.000482   -2.657775
   H     0.317611   -1.592746    1.730166
   H     1.156631   -3.938667    2.001605
   H     2.071908   -5.109400   -0.033912
   H     1.718434   -4.240391   -2.336094
   N    -0.146026    0.311588    0.612794
   N     0.147061   -0.312646   -0.612496
          24
Simulation Time: t =  288.00
   C    -1.030304    3.483655   -0.992114
   C    -1.554405    4.136958    0.150618
   C    -1.430477    3.606473    1.470953
   C    -0.916038    2.333541    1.642941
   C    -0.466486    1.625943    0.469484
   C    -0.441685    2.236461   -0.831042
   C     0.917343   -2.334421   -1.642796
   C     0.466142   -1.626572   -0.469201
   C     0.442870   -2.237323    0.830002
   C     1.029684   -3.481993    0.991885
   C     1.553702   -4.135902   -0.151074
   C     1.428804   -3.605317   -1.470159
   H    -1.125242    3.948196   -1.992590
   H    -2.063127    5.104635    0.035517
   H    -1.736751    4.236289    2.328293
   H    -0.669616    1.990302    2.665922
   H    -0.299867    1.600899   -1.731133
   H     0.672697   -1.990331   -2.666154
   H     0.296332   -1.605454    1.732824
   H     1.122865   -3.947555    1.991935
   H     2.062842   -5.102831   -0.033985
   H     1.734151   -4.234534   -2.329136
   N    -0.158592    0.305991    0.610739
   N     0.159731   -0.307252   -0.610415
          24
Simulation Time: t =  290.00
   C    -1.013706    3.488045   -0.986892
   C    -1.548868    4.137869    0.151896
   C    -1.440179    3.602551    1.473088
   C    -0.935198    2.324163    1.646882
   C    -0.473808    1.622529    0.473345
   C    -0.428651    2.239105   -0.827033
   C     0.936209   -2.325034   -1.646963
   C     0.473569   -1.623338   -0.472688
   C     0.430036   -2.239652    0.825723
   C     1.013112   -3.486509    0.986818
   C     1.548154   -4.136938   -0.152512
   C     1.438537   -3.601506   -1.472092
   H    -1.091169    3.955751   -1.979989
   H    -2.053196    5.098442    0.035321
   H    -1.752153    4.228011    2.319091
   H    -0.712325    1.978010    2.670491
   H    -0.276499    1.615192   -1.729306
   H     0.716417   -1.977324   -2.670695
   H     0.270807   -1.620446    1.730960
   H     1.088989   -3.955108    1.979095
   H     2.052857   -5.096701   -0.033674
   H     1.750071   -4.226142   -2.320127
   N    -0.171138    0.300589    0.608169
   N     0.172265   -0.301667   -0.607886
          24
Simulation Time: t =  292.00
   C    -0.997400    3.492854   -0.981051
   C    -1.543176    4.138768    0.153510
   C    -1.449923    3.598972    1.474136
   C    -0.953693    2.315073    1.650719
   C    -0.481175    1.618537    0.477262
   C    -0.416308    2.241531   -0.823158
   C     0.954344   -2.315944   -1.650902
   C     0.481099   -1.619486   -0.476475
   C     0.417914   -2.241893    0.821780
   C     0.996834   -3.491384    0.981009
   C     1.542420   -4.137966   -0.154107
   C     1.448326   -3.597983   -1.473098
   H    -1.057328    3.962995   -1.966108
   H    -2.043461    5.094960    0.034356
   H    -1.768622    4.218798    2.310590
   H    -0.757470    1.962393    2.672126
   H    -0.248800    1.630829   -1.723838
   H     0.762719   -1.960915   -2.672286
   H     0.240889   -1.636751    1.725120
   H     1.055396   -3.962370    1.965134
   H     2.043063   -5.093426   -0.032723
   H     1.767053   -4.216770   -2.311539
   N    -0.183597    0.295200    0.605229
   N     0.184701   -0.296105   -0.604967
          24
Simulation Time: t =  294.00
   C    -0.981369    3.497999   -0.974491
   C    -1.537298    4.139560    0.155640
   C    -1.459624    3.595609    1.473801
   C    -0.971577    2.306331    1.654211
   C    -0.488594    1.614170    0.481012
   C    -0.404656    2.243774   -0.818987
   C     0.971876   -2.307336   -1.654417
   C     0.488622   -1.614837   -0.480500
   C     0.406583   -2.244242    0.817909
   C     0.980775   -3.496483    0.974353
   C     1.536449   -4.138863   -0.155919
   C     1.458031   -3.594477   -1.473013
   H    -1.024040    3.971107   -1.953203
   H    -2.034646    5.095790    0.032400
   H    -1.787121    4.210209    2.305157
   H    -0.804368    1.942876    2.672277
   H    -0.216665    1.646307   -1.716224
   H     0.810915   -1.940582   -2.672392
   H     0.206473   -1.652852    1.716851
   H     1.022346   -3.970563    1.952357
   H     2.034394   -5.094468   -0.030862
   H     1.785967   -4.208013   -2.305796
   N    -0.195944    0.289709    0.602077
   N     0.197099   -0.290727   -0.601775
          24
Simulation Time: t =  296.00
   C    -0.965509    3.503303   -0.967181
   C    -1.531239    4.140247    0.158235
   C    -1.469172    3.592153    1.472154
   C    -0.988965    2.298162    1.657196
   C    -0.495955    1.609154    0.484617
   C    -0.393800    2.246071   -0.814354
   C     0.988834   -2.299189   -1.657270
   C     0.496228   -1.609851   -0.484404
   C     0.396008   -2.246644    0.813552
   C     0.964947   -3.501754    0.966837
   C     1.530282   -4.139668   -0.158123
   C     1.467616   -3.590956   -1.471634
   H    -0.991492    3.981002   -1.942920
   H    -2.026898    5.101131    0.029505
   H    -1.808115    4.203160    2.304083
   H    -0.852541    1.919203    2.672186
   H    -0.179938    1.660260   -1.708148
   H     0.860445   -1.916065   -2.672278
   H     0.167471   -1.667325    1.707934
   H     0.989995   -3.980532    1.942307
   H     2.026662   -5.100123   -0.028190
   H     1.807427   -4.200718   -2.304208
   N    -0.208257    0.284381    0.598799
   N     0.209382   -0.285261   -0.598497
          24
Simulation Time: t =  298.00
   C    -0.949761    3.508623   -0.959186
   C    -1.525070    4.140979    0.161229
   C    -1.478589    3.588564    1.469415
   C    -1.005860    2.290554    1.659473
   C    -0.503310    1.603689    0.488020
   C    -0.383757    2.248529   -0.809026
   C     1.005304   -2.291596   -1.659400
   C     0.503887   -1.604587   -0.488096
   C     0.386225   -2.249164    0.808472
   C     0.949264   -3.507111    0.958642
   C     1.524021   -4.140549   -0.160719
   C     1.477029   -3.587251   -1.469130
   H    -0.959763    3.992896   -1.935541
   H    -2.019516    5.109865    0.026107
   H    -1.831464    4.197324    2.306827
   H    -0.901824    1.891558    2.672287
   H    -0.138645    1.671908   -1.700676
   H     0.911056   -1.887696   -2.672143
   H     0.123937   -1.679373    1.699543
   H     0.958392   -3.992478    1.935125
   H     2.019247   -5.109131   -0.025077
   H     1.831316   -4.194753   -2.306530
   N    -0.220523    0.279175    0.595506
   N     0.221575   -0.279768   -0.595238
          24
Simulation Time: t =  300.00
   C    -0.934139    3.513993   -0.950612
   C    -1.518884    4.142027    0.164327
   C    -1.487904    3.584797    1.466072
   C    -1.022251    2.283394    1.660842
   C    -0.510798    1.598186    0.491332
   C    -0.374447    2.251126   -0.802966
   C     1.021411   -2.284672   -1.660884
   C     0.511482   -1.598831   -0.491467
   C     0.377251   -2.251924    0.802634
   C     0.933538   -3.512341    0.950130
   C     1.517822   -4.141757   -0.163770
   C     1.486332   -3.583303   -1.465912
   H    -0.928835    4.006330   -1.930038
   H    -2.011453    5.119901    0.022785
   H    -1.856345    4.191498    2.311339
   H    -0.952182    1.860760    2.671961
   H    -0.093322    1.681389   -1.693684
   H     0.962498   -1.856400   -2.671312
   H     0.076381   -1.689170    1.691585
   H     0.927554   -4.005889    1.929647
   H     2.011186   -5.119377   -0.022067
   H     1.856867   -4.188920   -2.310760
   N    -0.232699    0.273922    0.592345
   N     0.233752   -0.274527   -0.592073
          24
Simulation Time: t =  302.00
   C    -0.918492    3.519274   -0.941807
   C    -1.512828    4.143674    0.167483
   C    -1.497222    3.580835    1.462672
   C    -1.038213    2.276703    1.661357
   C    -0.518376    1.592602    0.494487
   C    -0.365835    2.253865   -0.796278
   C     1.037176   -2.278284   -1.661626
   C     0.519129   -1.592979   -0.494514
   C     0.368953   -2.254743    0.796058
   C     0.917788   -3.517551    0.941511
   C     1.511793   -4.143562   -0.167062
   C     1.495599   -3.579119   -1.462491
   H    -0.898715    4.020383   -1.924543
   H    -2.001680    5.129051    0.020190
   H    -1.881606    4.184160    2.314875
   H    -1.003533    1.828084    2.669884
   H    -0.044803    1.689750   -1.685848
   H     1.014694   -1.823484   -2.668414
   H     0.025798   -1.697823    1.682694
   H     0.897423   -4.019844    1.923993
   H     2.001344   -5.128650   -0.019770
   H     1.882868   -4.181679   -2.314184
   N    -0.244802    0.268758    0.589365
   N     0.245846   -0.269368   -0.589104
          24
Simulation Time: t =  304.00
   C    -0.902788    3.524552   -0.933078
   C    -1.506978    4.146121    0.170530
   C    -1.506615    3.576635    1.459689
   C    -1.053826    2.270407    1.661122
   C    -0.525992    1.586877    0.497500
   C    -0.357794    2.256626   -0.789104
   C     1.052587   -2.272228   -1.661601
   C     0.526906   -1.587385   -0.497210
   C     0.361178   -2.257475    0.788836
   C     0.901979   -3.522762    0.933024
   C     1.506013   -4.146181   -0.170469
   C     1.504960   -3.574795   -1.459305
   H    -0.869368    4.034080   -1.917036
   H    -1.989568    5.135634    0.018812
   H    -1.906237    4.174034    2.315188
   H    -1.055620    1.795138    2.664367
   H     0.005587    1.698386   -1.675313
   H     1.067432   -1.790505   -2.661896
   H    -0.026311   -1.706755    1.670913
   H     0.867991   -4.033366    1.916233
   H     1.989018   -5.135419   -0.018731
   H     1.908346   -4.171682   -2.314420
   N    -0.256861    0.263815    0.586600
   N     0.257805   -0.264118   -0.586407
          24
Simulation Time: t =  306.00
   C    -0.886980    3.529894   -0.924742
   C    -1.501429    4.149483    0.173666
   C    -1.516206    3.572425    1.457166
   C    -1.069093    2.264205    1.660245
   C    -0.533667    1.581445    0.500042
   C    -0.350166    2.259117   -0.781288
   C     1.067714   -2.266389   -1.660861
   C     0.534736   -1.581843   -0.499700
   C     0.353812   -2.260146    0.781205
   C     0.886069   -3.527976    0.924841
   C     1.500473   -4.149681   -0.173761
   C     1.514477   -3.570268   -1.456767
   H    -0.840810    4.046679   -1.906046
   H    -1.974866    5.139224    0.018980
   H    -1.929723    4.160611    2.311179
   H    -1.108134    1.763476    2.654003
   H     0.056336    1.708458   -1.660427
   H     1.120361   -1.759004   -2.650515
   H    -0.078380   -1.717196    1.654555
   H     0.839245   -4.045752    1.905048
   H     1.974223   -5.139115   -0.019203
   H     1.932579   -4.158331   -2.310264
   N    -0.268781    0.258827    0.584098
   N     0.269664   -0.258988   -0.583945
          24
Simulation Time: t =  308.00
   C    -0.871092    3.535401   -0.916878
   C    -1.496138    4.153713    0.176832
   C    -1.526017    3.568161    1.455173
   C    -1.084057    2.257955    1.658770
   C    -0.541396    1.576458    0.502047
   C    -0.342819    2.261209   -0.772850
   C     1.082595   -2.260538   -1.659392
   C     0.542635   -1.576480   -0.501906
   C     0.346713   -2.262644    0.773161
   C     0.870072   -3.533243    0.917012
   C     1.495116   -4.153976   -0.176931
   C     1.524208   -3.565603   -1.454909
   H    -0.812984    4.057927   -1.891252
   H    -1.958068    5.140574    0.020743
   H    -1.952084    4.144284    2.303095
   H    -1.160630    1.734304    2.638236
   H     0.106151    1.720761   -1.640170
   H     1.173076   -1.730135   -2.633872
   H    -0.129034   -1.729960    1.632626
   H     0.811105   -4.056830    1.890211
   H     1.957406   -5.140547   -0.021246
   H     1.955518   -4.141964   -2.301893
   N    -0.280504    0.253683    0.581829
   N     0.281346   -0.253921   -0.581687
          24
Simulation Time: t =  310.00
   C    -0.855066    3.540925   -0.909465
   C    -1.491022    4.158599    0.180118
   C    -1.536018    3.563762    1.453669
   C    -1.098850    2.251658    1.656693
   C    -0.549058    1.571668    0.503486
   C    -0.335677    2.263019   -0.763871
   C     1.097226   -2.254468   -1.657105
   C     0.550636   -1.571709   -0.503725
   C     0.339730   -2.264814    0.764584
   C     0.854061   -3.538657    0.909466
   C     1.489860   -4.158899   -0.180011
   C     1.534156   -3.560824   -1.453579
   H    -0.785703    4.068137   -1.873582
   H    -1.940314    5.141537    0.023886
   H    -1.973916    4.126294    2.292351
   H    -1.212697    1.708246    2.617588
   H     0.153984    1.735496   -1.614449
   H     1.225132   -1.704560   -2.612555
   H    -0.177126   -1.745188    1.605169
   H     0.783382   -4.066913    1.872626
   H     1.939557   -5.141642   -0.024676
   H     1.977786   -4.123734   -2.290778
   N    -0.292047    0.248592    0.579732
   N     0.292777   -0.248648   -0.579637
          24
Simulation Time: t =  312.00
   C    -0.839051    3.546532   -0.902164
   C    -1.485861    4.163866    0.183273
   C    -1.546150    3.559045    1.452596
   C    -1.113468    2.245224    1.653760
   C    -0.556766    1.567311    0.504574
   C    -0.328624    2.264591   -0.754404
   C     1.111733   -2.248196   -1.654016
   C     0.558650   -1.567462   -0.505027
   C     0.332796   -2.266675    0.755396
   C     0.838044   -3.544179    0.902102
   C     1.484593   -4.164143   -0.183118
   C     1.544272   -3.555850   -1.452568
   H    -0.758672    4.078029   -1.854877
   H    -1.922828    5.144651    0.028146
   H    -1.996261    4.108368    2.281241
   H    -1.264073    1.685383    2.593472
   H     0.199387    1.752336   -1.584052
   H     1.276204   -1.682412   -2.587931
   H    -0.222154   -1.762432    1.573258
   H     0.755749   -4.076703    1.854056
   H     1.921940   -5.144911   -0.029209
   H     2.000341   -4.105368   -2.279227
   N    -0.303296    0.243401    0.577721
   N     0.303899   -0.243236   -0.577699
          24
Simulation Time: t =  314.00
   C    -0.823080    3.552097   -0.894697
   C    -1.480520    4.169238    0.186320
   C    -1.556367    3.553998    1.451734
   C    -1.127918    2.238580    1.649794
   C    -0.564591    1.563658    0.505342
   C    -0.321658    2.266064   -0.744423
   C     1.126268   -2.241805   -1.650117
   C     0.566575   -1.563481   -0.505804
   C     0.325863   -2.268392    0.745605
   C     0.822024   -3.549675    0.894781
   C     1.479197   -4.169394   -0.186372
   C     1.554479   -3.550582   -1.451659
   H    -0.731468    4.088484   -1.837271
   H    -1.906706    5.152107    0.033332
   H    -2.020286    4.092198    2.272120
   H    -1.314608    1.665404    2.567775
   H     0.242368    1.770449   -1.550630
   H     1.326104   -1.663386   -2.561960
   H    -0.264198   -1.780883    1.538596
   H     0.727784   -4.087042    1.836540
   H     1.905681   -5.152501   -0.034629
   H     2.024341   -4.088561   -2.269714
   N    -0.314151    0.237947    0.575771
   N     0.314708   -0.237940   -0.575784
          24
Simulation Time: t =  316.00
   C    -0.807203    3.557531   -0.886882
   C    -1.474875    4.174492    0.189204
   C    -1.566611    3.548476    1.451030
   C    -1.142342    2.231882    1.644762
   C    -0.572450    1.560354    0.505967
   C    -0.314749    2.267711   -0.734040
   C     1.140830   -2.235226   -1.645245
   C     0.574484   -1.560090   -0.506101
   C     0.318902   -2.270010    0.735112
   C     0.806106   -3.555188    0.887233
   C     1.473578   -4.174461   -0.189747
   C     1.564769   -3.545062   -1.450650
   H    -0.703617    4.100119   -1.822428
   H    -1.892568    5.164711    0.039337
   H    -2.046724    4.078834    2.266562
   H    -1.364220    1.647764    2.542564
   H     0.283393    1.788751   -1.516232
   H     1.374837   -1.646877   -2.536711
   H    -0.303736   -1.799365    1.503415
   H     0.699045   -4.098574    1.821766
   H     1.891204   -5.165252   -0.040888
   H     2.050557   -4.074477   -2.263893
   N    -0.324635    0.232526    0.573746
   N     0.325109   -0.232563   -0.573829
          24
Simulation Time: t =  318.00
   C    -0.791412    3.562814   -0.878705
   C    -1.468972    4.179571    0.192195
   C    -1.576915    3.542644    1.450290
   C    -1.156887    2.225212    1.638752
   C    -0.580278    1.557252    0.506272
   C    -0.307890    2.269611   -0.723171
   C     1.155479   -2.228499   -1.639332
   C     0.582393   -1.557276   -0.506029
   C     0.311918   -2.271733    0.723996
   C     0.790337   -3.560682    0.879290
   C     1.467712   -4.179313   -0.193199
   C     1.575177   -3.539355   -1.449536
   H    -0.674751    4.113006   -1.811003
   H    -1.880039    5.181479    0.046292
   H    -2.075539    4.068322    2.264633
   H    -1.412842    1.631940    2.519477
   H     0.323117    1.806201   -1.482846
   H     1.422361   -1.632247   -2.513901
   H    -0.341487   -1.816813    1.469717
   H     0.669163   -4.111417    1.810434
   H     1.878170   -5.182154   -0.048107
   H     2.078928   -4.063247   -2.261909
   N    -0.334670    0.227259    0.571558
   N     0.335032   -0.227116   -0.571744
          24
Simulation Time: t =  320.00
   C    -0.775805    3.568166   -0.870153
   C    -1.462894    4.184569    0.195367
   C    -1.587395    3.536758    1.449431
   C    -1.171588    2.218520    1.631849
   C    -0.588079    1.554621    0.506207
   C    -0.301011    2.271677   -0.711758
   C     1.170407   -2.221769   -1.632462
   C     0.590230   -1.554501   -0.505825
   C     0.304836   -2.273881    0.712517
   C     0.774771   -3.566148    0.870897
   C     1.461584   -4.184046   -0.196588
   C     1.585766   -3.533474   -1.448509
   H    -0.644672    4.126524   -1.802350
   H    -1.868107    5.199966    0.054474
   H    -2.105711    4.059717    2.265022
   H    -1.460367    1.617659    2.499205
   H     0.361782    1.822019   -1.451900
   H     1.468454   -1.619176   -2.494407
   H    -0.377970   -1.832518    1.438868
   H     0.637989   -4.124989    1.801903
   H     1.865747   -5.200629   -0.056529
   H     2.108633   -4.054035   -2.262455
   N    -0.344182    0.221956    0.569186
   N     0.344500   -0.221984   -0.569433
          24
Simulation Time: t =  322.00
   C    -0.760323    3.573580   -0.861377
   C    -1.456762    4.189633    0.198872
   C    -1.598171    3.531062    1.448506
   C    -1.186668    2.211856    1.624332
   C    -0.595721    1.552053    0.505769
   C    -0.294033    2.274106   -0.700002
   C     1.185687   -2.214901   -1.624780
   C     0.598016   -1.551862   -0.505513
   C     0.297581   -2.276479    0.700778
   C     0.759440   -3.571737    0.862093
   C     1.455294   -4.188836   -0.199980
   C     1.596674   -3.527754   -1.447554
   H    -0.613439    4.139574   -1.794846
   H    -1.855722    5.217136    0.064077
   H    -2.135704    4.051523    2.265629
   H    -1.506287    1.605139    2.481591
   H     0.399201    1.835929   -1.423910
   H     1.512684   -1.607775   -2.478022
   H    -0.413047   -1.846132    1.411403
   H     0.605626   -4.138157    1.794479
   H     1.852780   -5.217655   -0.066362
   H     2.138174   -4.045477   -2.263459
   N    -0.353153    0.216848    0.566513
   N     0.353415   -0.217043   -0.566817
          24
Simulation Time: t =  324.00
   C    -0.745059    3.579211   -0.852385
   C    -1.450563    4.194888    0.202523
   C    -1.609346    3.525634    1.447687
   C    -1.202311    2.205210    1.616397
   C    -0.603190    1.549170    0.505219
   C    -0.286769    2.277076   -0.688240
   C     1.201431   -2.207819   -1.616569
   C     0.605729   -1.549361   -0.505069
   C     0.290031   -2.279478    0.688931
   C     0.744367   -3.577682    0.852996
   C     1.448929   -4.193845   -0.203443
   C     1.608033   -3.522448   -1.446662
   H    -0.581256    4.150954   -1.786527
   H    -1.841898    5.230466    0.075127
   H    -2.163881    4.042386    2.264460
   H    -1.549879    1.594826    2.465833
   H     0.434612    1.848131   -1.398481
   H     1.554390   -1.598477   -2.463830
   H    -0.446027   -1.857791    1.387007
   H     0.572379   -4.149655    1.786102
   H     1.838370   -5.230775   -0.077621
   H     2.166049   -4.036198   -2.262836
   N    -0.361568    0.212151    0.563445
   N     0.361703   -0.212187   -0.563858
          24
Simulation Time: t =  326.00
   C    -0.730028    3.585180   -0.843160
   C    -1.444333    4.200376    0.206372
   C    -1.620997    3.520737    1.446883
   C    -1.218592    2.198411    1.608201
   C    -0.610535    1.546168    0.504610
   C    -0.279067    2.280600   -0.676687
   C     1.217948   -2.200638   -1.608267
   C     0.613153   -1.546492   -0.504415
   C     0.281992   -2.282963    0.677224
   C     0.729478   -3.583982    0.843826
   C     1.442609   -4.199121   -0.207224
   C     1.619850   -3.517677   -1.445765
   H    -0.548438    4.159728   -1.775801
   H    -1.826276    5.238719    0.087440
   H    -2.189205    4.031407    2.260154
   H    -1.590328    1.587145    2.450956
   H     0.466670    1.859098   -1.374796
   H     1.592845   -1.591688   -2.450727
   H    -0.475586   -1.867916    1.364897
   H     0.538557   -4.158563    1.775048
   H     1.822206   -5.238688   -0.090082
   H     2.191111   -4.025345   -2.259239
   N    -0.369367    0.207662    0.560015
   N     0.369427   -0.207736   -0.560510
          24
Simulation Time: t =  328.00
   C    -0.715279    3.591596   -0.833708
   C    -1.438058    4.206023    0.210457
   C    -1.633106    3.516375    1.445980
   C    -1.235633    2.191505    1.599982
   C    -0.617735    1.542939    0.503999
   C    -0.270747    2.284678   -0.665572
   C     1.235368   -2.193340   -1.600132
   C     0.620297   -1.543170   -0.503516
   C     0.273303   -2.286867    0.665810
   C     0.714807   -3.590784    0.834592
   C     1.436322   -4.204546   -0.211424
   C     1.632134   -3.513540   -1.444685
   H    -0.515216    4.165550   -1.761853
   H    -1.808911    5.242243    0.100637
   H    -2.211301    4.018494    2.252468
   H    -1.627077    1.582192    2.436214
   H     0.494163    1.869381   -1.351962
   H     1.627502   -1.587541   -2.437847
   H    -0.500596   -1.877025    1.344175
   H     0.504495   -4.164503    1.760523
   H     1.804358   -5.241900   -0.103406
   H     2.212899   -4.012739   -2.252333
   N    -0.376527    0.203374    0.556172
   N     0.376512   -0.203699   -0.556738
          24
Simulation Time: t =  330.00
   C    -0.700713    3.598319   -0.824123
   C    -1.431802    4.211601    0.215156
   C    -1.645524    3.512572    1.444666
   C    -1.253711    2.184664    1.592069
   C    -0.624600    1.539082    0.503186
   C    -0.261700    2.289344   -0.654983
   C     1.253739   -2.185921   -1.592266
   C     0.627155   -1.539607   -0.502416
   C     0.263878   -2.291201    0.654831
   C     0.700322   -3.598038    0.825198
   C     1.430057   -4.209937   -0.216151
   C     1.644805   -3.510062   -1.443205
   H    -0.481689    4.168775   -1.744798
   H    -1.790668    5.242863    0.114141
   H    -2.230713    4.004296    2.242270
   H    -1.659808    1.579720    2.421424
   H     0.516196    1.879192   -1.329651
   H     1.658070   -1.585746   -2.424988
   H    -0.520174   -1.885294    1.324502
   H     0.470321   -4.167817    1.742773
   H     1.785608   -5.242298   -0.117048
   H     2.231786   -3.998885   -2.242875
   N    -0.383113    0.199601    0.551946
   N     0.382995   -0.199926   -0.552603
          24
Simulation Time: t =  332.00
   C    -0.686407    3.605432   -0.814275
   C    -1.425461    4.216817    0.220494
   C    -1.658119    3.509190    1.442691
   C    -1.272840    2.177981    1.584501
   C    -0.631179    1.534793    0.502164
   C    -0.251878    2.294472   -0.644901
   C     1.273150   -2.178570   -1.584667
   C     0.633768   -1.535693   -0.501272
   C     0.253671   -2.296126    0.644476
   C     0.686037   -3.605575    0.815458
   C     1.423686   -4.215019   -0.221321
   C     1.657718   -3.506988   -1.441249
   H    -0.447849    4.170283   -1.725629
   H    -1.772449    5.243484    0.127464
   H    -2.248492    3.989942    2.231267
   H    -1.688659    1.579007    2.407040
   H     0.532836    1.888539   -1.308061
   H     1.684647   -1.585520   -2.412683
   H    -0.534334   -1.892803    1.305873
   H     0.436000   -4.169550    1.722995
   H     1.767024   -5.242861   -0.130515
   H     2.248759   -3.984910   -2.232460
   N    -0.389117    0.196221    0.547393
   N     0.388897   -0.196517   -0.548135
          24
Simulation Time: t =  334.00
   C    -0.672242    3.612636   -0.804016
   C    -1.419049    4.221433    0.226613
   C    -1.670736    3.506141    1.439850
   C    -1.293022    2.171571    1.577209
   C    -0.637485    1.530378    0.500877
   C    -0.241385    2.300130   -0.635302
   C     1.293647   -2.171516   -1.577283
   C     0.640127   -1.531269   -0.500165
   C     0.242703   -2.301758    0.634807
   C     0.671937   -3.613167    0.805194
   C     1.417123   -4.219544   -0.226943
   C     1.670707   -3.504087   -1.438708
   H    -0.413457    4.171469   -1.705894
   H    -1.755432    5.246988    0.140166
   H    -2.266036    3.976755    2.221331
   H    -1.714076    1.579002    2.394181
   H     0.544686    1.896986   -1.288182
   H     1.707759   -1.585688   -2.402005
   H    -0.543728   -1.899269    1.288998
   H     0.401314   -4.171198    1.702928
   H     1.749692   -5.246434   -0.143333
   H     2.265252   -3.972138   -2.222928
   N    -0.394558    0.193098    0.542613
   N     0.394293   -0.193657   -0.543381
          24
Simulation Time: t =  336.00
   C    -0.658317    3.619787   -0.793128
   C    -1.412387    4.225331    0.233193
   C    -1.683280    3.503060    1.436275
   C    -1.314181    2.165619    1.569982
   C    -0.643617    1.525760    0.499607
   C    -0.230276    2.306458   -0.626199
   C     1.315121   -2.164857   -1.570023
   C     0.646267   -1.526664   -0.498984
   C     0.231123   -2.307967    0.625647
   C     0.657969   -3.620671    0.794319
   C     1.410405   -4.223401   -0.233142
   C     1.683659   -3.501298   -1.435403
   H    -0.378336    4.173783   -1.687184
   H    -1.740122    5.255085    0.152057
   H    -2.284441    3.965803    2.213884
   H    -1.736790    1.578479    2.384173
   H     0.553302    1.904041   -1.271221
   H     1.728254   -1.584988   -2.394066
   H    -0.549701   -1.904295    1.274888
   H     0.366119   -4.174235    1.684194
   H     1.734234   -5.254772   -0.155289
   H     2.282503   -3.961801   -2.215795
   N    -0.399553    0.190411    0.537651
   N     0.399219   -0.191195   -0.538456
          24
Simulation Time: t =  338.00
   C    -0.644494    3.626658   -0.781583
   C    -1.405563    4.228507    0.240334
   C    -1.695721    3.499969    1.431910
   C    -1.336255    2.160157    1.562700
   C    -0.649569    1.521050    0.498263
   C    -0.218753    2.313452   -0.617400
   C     1.337461   -2.158660   -1.562828
   C     0.652183   -1.522182   -0.497603
   C     0.219103   -2.314557    0.616765
   C     0.644070   -3.628041    0.782849
   C     1.403631   -4.226679   -0.240008
   C     1.696513   -3.498563   -1.431244
   H    -0.342472    4.178336   -1.670338
   H    -1.726562    5.267554    0.163184
   H    -2.304059    3.957644    2.209517
   H    -1.757516    1.576497    2.377970
   H     0.560195    1.909044   -1.258631
   H     1.746888   -1.582467   -2.389616
   H    -0.553803   -1.907369    1.264753
   H     0.330461   -4.179696    1.667516
   H     1.720512   -5.267496   -0.166415
   H     2.301161   -3.954594   -2.211709
   N    -0.404156    0.188260    0.532616
   N     0.403735   -0.189030   -0.533471
          24
Simulation Time: t =  340.00
   C    -0.630752    3.633346   -0.769464
   C    -1.398653    4.231260    0.247934
   C    -1.708109    3.496804    1.426875
   C    -1.359074    2.155134    1.555269
   C    -0.655387    1.516659    0.496816
   C    -0.206953    2.320849   -0.608634
   C     1.360577   -2.152896   -1.555619
   C     0.657865   -1.517876   -0.496009
   C     0.206819   -2.321407    0.607950
   C     0.630183   -3.635263    0.770869
   C     1.396869   -4.229588   -0.247486
   C     1.709273   -3.495866   -1.426350
   H    -0.306301    4.185546   -1.655127
   H    -1.714030    5.282219    0.173712
   H    -2.324605    3.952188    2.207631
   H    -1.776736    1.572627    2.375724
   H     0.566773    1.911624   -1.251356
   H     1.764148   -1.577795   -2.388610
   H    -0.557447   -1.908138    1.259495
   H     0.294771   -4.187923    1.652461
   H     1.708007   -5.282398   -0.176824
   H     2.320964   -3.950472   -2.210147
   N    -0.408473    0.186492    0.527624
   N     0.407953   -0.187303   -0.528530
          24
Simulation Time: t =  342.00
   C    -0.616905    3.639884   -0.756972
   C    -1.391888    4.233946    0.256095
   C    -1.720550    3.493733    1.421264
   C    -1.382526    2.150386    1.547692
   C    -0.661027    1.512919    0.495069
   C    -0.195053    2.328367   -0.599667
   C     1.384340   -2.147495   -1.548324
   C     0.663389   -1.513832   -0.494341
   C     0.194395   -2.328551    0.599172
   C     0.616195   -3.642297    0.758506
   C     1.390172   -4.232520   -0.255341
   C     1.722076   -3.493081   -1.421054
   H    -0.270529    4.195197   -1.640325
   H    -1.701618    5.296033    0.183857
   H    -2.344931    3.948905    2.206817
   H    -1.794578    1.567099    2.376687
   H     0.573396    1.911803   -1.249566
   H     1.780121   -1.571279   -2.390203
   H    -0.561392   -1.906687    1.259243
   H     0.259822   -4.198569    1.637668
   H     1.695619   -5.296424   -0.186801
   H     2.340889   -3.948795   -2.209658
   N    -0.412560    0.185015    0.522817
   N     0.411985   -0.186070   -0.523733
          24
Simulation Time: t =  344.00
   C    -0.602889    3.646377   -0.744305
   C    -1.385289    4.236954    0.264587
   C    -1.733168    3.490644    1.415456
   C    -1.406509    2.145797    1.539955
   C    -0.666544    1.509883    0.493154
   C    -0.183043    2.335863   -0.590506
   C     1.408532   -2.142200   -1.540824
   C     0.668875   -1.510602   -0.492702
   C     0.181901   -2.335809    0.590367
   C     0.601983   -3.649205    0.745892
   C     1.383624   -4.235857   -0.263400
   C     1.735064   -3.490250   -1.415647
   H    -0.236120    4.206601   -1.624224
   H    -1.688575    5.306180    0.193790
   H    -2.363879    3.946959    2.205212
   H    -1.810831    1.560642    2.379323
   H     0.579679    1.910328   -1.252246
   H     1.794679   -1.563736   -2.392901
   H    -0.565255   -1.903596    1.263293
   H     0.226618   -4.210869    1.621406
   H     1.682674   -5.306740   -0.196515
   H     2.359635   -3.948658   -2.208433
   N    -0.416520    0.183891    0.518251
   N     0.415883   -0.185049   -0.519176
          24
Simulation Time: t =  346.00
   C    -0.588531    3.652820   -0.731637
   C    -1.378908    4.240544    0.273264
   C    -1.746103    3.487518    1.409722
   C    -1.430907    2.141167    1.532102
   C    -0.671983    1.507656    0.491116
   C    -0.170946    2.343274   -0.581237
   C     1.432999   -2.136803   -1.533115
   C     0.674386   -1.508450   -0.491110
   C     0.169352   -2.342923    0.581514
   C     0.587458   -3.656152    0.733199
   C     1.377258   -4.239813   -0.271545
   C     1.748373   -3.487407   -1.410366
   H    -0.204005    4.218974   -1.605201
   H    -1.674432    5.311140    0.203682
   H    -2.380409    3.945667    2.201433
   H    -1.825140    1.554349    2.381788
   H     0.584468    1.908224   -1.257809
   H     1.807634   -1.556179   -2.394967
   H    -0.568023   -1.899845    1.270159
   H     0.196041   -4.223998    1.602144
   H     1.668731   -5.311863   -0.206124
   H     2.376010   -3.949176   -2.204968
   N    -0.420446    0.183130    0.514038
   N     0.419724   -0.184161   -0.514962
          24
Simulation Time: t =  348.00
   C    -0.573831    3.659419   -0.718988
   C    -1.372638    4.244773    0.281858
   C    -1.759455    3.484372    1.404274
   C    -1.455448    2.136181    1.524034
   C    -0.677510    1.506678    0.489118
   C    -0.158744    2.350346   -0.571908
   C     1.457687   -2.131220   -1.525318
   C     0.679828   -1.507315   -0.489443
   C     0.156740   -2.349654    0.572607
   C     0.572507   -3.663197    0.720626
   C     1.371118   -4.244384   -0.279835
   C     1.762062   -3.484592   -1.405315
   H    -0.174896    4.231715   -1.582266
   H    -1.659342    5.311105    0.213599
   H    -2.394072    3.944521    2.194722
   H    -1.837423    1.549153    2.382396
   H     0.586462    1.906601   -1.264391
   H     1.818999   -1.549505   -2.394927
   H    -0.568511   -1.896567    1.278018
   H     0.168638   -4.237462    1.579080
   H     1.653901   -5.312011   -0.215711
   H     2.389479   -3.949766   -2.198432
   N    -0.424370    0.182494    0.510210
   N     0.423591   -0.183540   -0.511106
          24
Simulation Time: t =  350.00
   C    -0.558756    3.666230   -0.706370
   C    -1.366435    4.249449    0.290340
   C    -1.773255    3.481280    1.399169
   C    -1.479962    2.130710    1.515712
   C    -0.683129    1.507046    0.487157
   C    -0.146444    2.356863   -0.562557
   C     1.482459   -2.125414   -1.517440
   C     0.685152   -1.507254   -0.487616
   C     0.144075   -2.355730    0.563662
   C     0.557105   -3.670395    0.708233
   C     1.365180   -4.249380   -0.288313
   C     1.776148   -3.481848   -1.400532
   H    -0.148963    4.244727   -1.555438
   H    -1.643920    5.308005    0.223605
   H    -2.404962    3.943413    2.185090
   H    -1.847944    1.545542    2.380156
   H     0.584636    1.906403   -1.270400
   H     1.829087   -1.544140   -2.392015
   H    -0.565709   -1.894824    1.285098
   H     0.144412   -4.251249    1.552442
   H     1.638791   -5.309126   -0.225356
   H     2.400173   -3.950208   -2.188780
   N    -0.428364    0.182003    0.506811
   N     0.427566   -0.183232   -0.507649
          24
Simulation Time: t =  352.00
   C    -0.543337    3.673233   -0.693721
   C    -1.360180    4.254261    0.298629
   C    -1.787514    3.478126    1.394491
   C    -1.504323    2.124880    1.507094
   C    -0.688797    1.508473    0.485262
   C    -0.134065    2.362732   -0.553286
   C     1.507064   -2.119314   -1.509303
   C     0.690400   -1.508523   -0.485561
   C     0.131450   -2.360884    0.554645
   C     0.541317   -3.677789    0.695873
   C     1.359370   -4.254458   -0.297002
   C     1.790599   -3.479302   -1.395949
   H    -0.125798    4.258446   -1.525804
   H    -1.628972    5.305023    0.233798
   H    -2.413742    3.942655    2.173362
   H    -1.857378    1.543338    2.374994
   H     0.578841    1.908243   -1.274603
   H     1.838523   -1.539980   -2.386352
   H    -0.559299   -1.895249    1.290219
   H     0.122846   -4.265867    1.523482
   H     1.624378   -5.306328   -0.235093
   H     2.408852   -3.950713   -2.176773
   N    -0.432512    0.181908    0.503824
   N     0.431657   -0.183108   -0.504629
          24
Simulation Time: t =  354.00
   C    -0.527611    3.680365   -0.680906
   C    -1.353850    4.258810    0.306830
   C    -1.802153    3.474994    1.390111
   C    -1.528353    2.118795    1.498052
   C    -0.694422    1.510919    0.483355
   C    -0.121737    2.367838   -0.544047
   C     1.531288   -2.113035   -1.500699
   C     0.695610   -1.511034   -0.483392
   C     0.118957   -2.365120    0.545610
   C     0.525280   -3.685308    0.683302
   C     1.353510   -4.259251   -0.305755
   C     1.805336   -3.476854   -1.391573
   H    -0.104596    4.273678   -1.495167
   H    -1.615495    5.305461    0.244176
   H    -2.421669    3.942844    2.160978
   H    -1.866704    1.541806    2.367687
   H     0.569617    1.912050   -1.276786
   H     1.848207   -1.536459   -2.378666
   H    -0.549833   -1.897888    1.292992
   H     0.103018   -4.282114    1.493994
   H     1.611638   -5.306870   -0.244945
   H     2.416889   -3.951827   -2.163937
   N    -0.436850    0.182240    0.501204
   N     0.435903   -0.183248   -0.501988
          24
Simulation Time: t =  356.00
   C    -0.511734    3.687662   -0.667683
   C    -1.347360    4.262826    0.314894
   C    -1.817041    3.471872    1.385864
   C    -1.551794    2.112539    1.488362
   C    -0.700076    1.514498    0.481460
   C    -0.109665    2.372121   -0.534751
   C     1.554958   -2.106807   -1.491478
   C     0.700785   -1.514331   -0.481225
   C     0.106773   -2.368733    0.536649
   C     0.509074   -3.692765    0.670294
   C     1.347449   -4.263463   -0.314432
   C     1.820288   -3.474334   -1.387365
   H    -0.084322    4.291269   -1.465445
   H    -1.603991    5.311397    0.254848
   H    -2.430321    3.944688    2.149815
   H    -1.876969    1.539911    2.359377
   H     0.558524    1.917184   -1.277468
   H     1.859122   -1.532761   -2.370059
   H    -0.538763   -1.902175    1.293883
   H     0.083937   -4.300717    1.465728
   H     1.601093   -5.312834   -0.255106
   H     2.425894   -3.954254   -2.152232
   N    -0.441354    0.182874    0.498916
   N     0.440349   -0.183929   -0.499661
          24
Simulation Time: t =  358.00
   C    -0.495728    3.694963   -0.653954
   C    -1.340756    4.266223    0.322907
   C    -1.832033    3.468757    1.381589
   C    -1.574543    2.106331    1.477981
   C    -0.705659    1.518903    0.479506
   C    -0.098105    2.375804   -0.525321
   C     1.577834   -2.100710   -1.481426
   C     0.706005   -1.518347   -0.479214
   C     0.095107   -2.371921    0.527695
   C     0.492859   -3.700143    0.656607
   C     1.341095   -4.267016   -0.322873
   C     1.835325   -3.471685   -1.383218
   H    -0.064114    4.311672   -1.438071
   H    -1.594422    5.322673    0.265951
   H    -2.441218    3.948654    2.141387
   H    -1.889102    1.536601    2.351172
   H     0.547666    1.922529   -1.277832
   H     1.872148   -1.528052   -2.361403
   H    -0.527941   -1.907019    1.294114
   H     0.064807   -4.321914    1.439870
   H     1.592697   -5.323991   -0.265687
   H     2.437313   -3.958503   -2.143348
   N    -0.445996    0.183899    0.496836
   N     0.444950   -0.185083   -0.497519
          24
Simulation Time: t =  360.00
   C    -0.479654    3.702270   -0.639643
   C    -1.334038    4.269138    0.330795
   C    -1.847036    3.465524    1.377268
   C    -1.596505    2.100408    1.466872
   C    -0.711144    1.523615    0.477610
   C    -0.087276    2.379187   -0.515789
   C     1.599764   -2.094830   -1.470436
   C     0.711288   -1.523085   -0.477356
   C     0.084183   -2.374891    0.518605
   C     0.476706   -3.707456    0.642153
   C     1.334503   -4.270035   -0.331064
   C     1.850348   -3.468948   -1.378998
   H    -0.043469    4.334555   -1.413483
   H    -1.586150    5.336838    0.277577
   H    -2.455079    3.954602    2.136350
   H    -1.903798    1.531134    2.343594
   H     0.539129    1.926910   -1.279086
   H     1.887793   -1.521750   -2.353153
   H    -0.519159   -1.911211    1.295088
   H     0.045347   -4.345175    1.416648
   H     1.585736   -5.338019   -0.276926
   H     2.451822   -3.964580   -2.138037
   N    -0.450764    0.185534    0.494860
   N     0.449631   -0.186541   -0.495490
          24
Simulation Time: t =  362.00
   C    -0.463509    3.709645   -0.624761
   C    -1.327358    4.271776    0.338692
   C    -1.861979    3.462390    1.372788
   C    -1.617572    2.094793    1.455071
   C    -0.716497    1.528608    0.475680
   C    -0.077376    2.382392   -0.506074
   C     1.620776   -2.089401   -1.458633
   C     0.716517   -1.528112   -0.475603
   C     0.074161   -2.377923    0.509362
   C     0.460567   -3.714720    0.627034
   C     1.327808   -4.272768   -0.339084
   C     1.865300   -3.466065   -1.374672
   H    -0.022512    4.358701   -1.391129
   H    -1.578327    5.350385    0.289803
   H    -2.471764    3.961639    2.134100
   H    -1.921310    1.523354    2.336298
   H     0.534247    1.929488   -1.281927
   H     1.906230   -1.513786   -2.344941
   H    -0.513756   -1.913942    1.297544
   H     0.025726   -4.369164    1.395262
   H     1.579178   -5.351415   -0.288948
   H     2.469164   -3.971679   -2.135838
   N    -0.455559    0.187609    0.492895
   N     0.454347   -0.188393   -0.493460
          24
Simulation Time: t =  364.00
   C    -0.447307    3.717257   -0.609369
   C    -1.320761    4.274409    0.346552
   C    -1.876871    3.459412    1.368234
   C    -1.637705    2.089519    1.442673
   C    -0.721758    1.533766    0.473771
   C    -0.068440    2.385567   -0.496259
   C     1.640939   -2.084533   -1.446252
   C     0.721498   -1.533045   -0.473827
   C     0.065156   -2.381149    0.499971
   C     0.444343   -3.722025    0.611460
   C     1.321229   -4.275386   -0.347154
   C     1.880143   -3.463214   -1.370196
   H    -0.001749    4.382302   -1.369705
   H    -1.570117    5.360062    0.302627
   H    -2.490368    3.968279    2.133180
   H    -1.941500    1.513749    2.328073
   H     0.533279    1.930062   -1.286014
   H     1.927283   -1.504613   -2.335647
   H    -0.512062   -1.914983    1.301283
   H     0.006392   -4.392042    1.374262
   H     1.572129   -5.360960   -0.301763
   H     2.488318   -3.978291   -2.135143
   N    -0.460276    0.189944    0.490806
   N     0.459040   -0.190696   -0.491269
          24
Simulation Time: t =  366.00
   C    -0.430926    3.725103   -0.593646
   C    -1.314418    4.277117    0.354558
   C    -1.891744    3.456769    1.363613
   C    -1.656978    2.084656    1.429973
   C    -0.726801    1.538573    0.471819
   C    -0.060434    2.388909   -0.486548
   C     1.660292   -2.080228   -1.433500
   C     0.726183   -1.537855   -0.471907
   C     0.057168   -2.384555    0.490536
   C     0.427987   -3.729499    0.595582
   C     1.314919   -4.278035   -0.355419
   C     1.894880   -3.460582   -1.365609
   H     0.018197    4.403482   -1.347803
   H    -1.560876    5.364007    0.316111
   H    -2.509529    3.972897    2.131778
   H    -1.964036    1.503141    2.317215
   H     0.535569    1.929221   -1.289849
   H     1.950640   -1.494993   -2.323775
   H    -0.513678   -1.914884    1.304809
   H    -0.012178   -4.412018    1.352295
   H     1.564007   -5.364704   -0.315327
   H     2.507944   -3.982650   -2.133874
   N    -0.464899    0.192693    0.488503
   N     0.463634   -0.193266   -0.488867
          24
Simulation Time: t =  368.00
   C    -0.414392    3.733321   -0.577625
   C    -1.308311    4.279884    0.362666
   C    -1.906624    3.454472    1.359019
   C    -1.675427    2.080250    1.417138
   C    -0.731609    1.542748    0.469916
   C    -0.053225    2.392472   -0.477208
   C     1.678828   -2.076493   -1.420517
   C     0.730584   -1.542442   -0.469838
   C     0.050066   -2.388166    0.481307
   C     0.411521   -3.737178    0.579456
   C     1.308918   -4.280696   -0.363943
   C     1.909553   -3.458326   -1.361027
   H     0.037003    4.420853   -1.324384
   H    -1.550596    5.362102    0.330128
   H    -2.528089    3.974142    2.128288
   H    -1.988536    1.492357    2.302218
   H     0.539745    1.928013   -1.291366
   H     1.976015   -1.485590   -2.308030
   H    -0.517453   -1.914698    1.306025
   H    -0.029821   -4.427883    1.328575
   H     1.554739   -5.362525   -0.329516
   H     2.526856   -3.983211   -2.130070
   N    -0.469358    0.195828    0.485855
   N     0.468029   -0.195951   -0.486146
          24
Simulation Time: t =  370.00
   C    -0.397702    3.741845   -0.561373
   C    -1.302570    4.282554    0.371065
   C    -1.921461    3.452659    1.354403
   C    -1.693115    2.076333    1.404305
   C    -0.736128    1.546398    0.467913
   C    -0.046689    2.396216   -0.468385
   C     1.696506   -2.073409   -1.407402
   C     0.734768   -1.546293   -0.467789
   C     0.043669   -2.392118    0.472669
   C     0.395033   -3.745043    0.562992
   C     1.303119   -4.283190   -0.372631
   C     1.924227   -3.456400   -1.356578
   H     0.054774    4.433845   -1.299239
   H    -1.539538    5.356174    0.344631
   H    -2.545287    3.971252    2.121721
   H    -2.014779    1.481918    2.282232
   H     0.544547    1.927572   -1.288518
   H     2.003408   -1.476752   -2.287606
   H    -0.522413   -1.915503    1.302905
   H    -0.046797   -4.439290    1.303126
   H     1.544645   -5.356152   -0.344161
   H     2.544376   -3.979154   -2.122684
   N    -0.473574    0.199054    0.482826
   N     0.472218   -0.198952   -0.483023
          24
Simulation Time: t =  372.00
   C    -0.380942    3.750607   -0.544832
   C    -1.297162    4.284840    0.379816
   C    -1.936174    3.451286    1.349747
   C    -1.710063    2.073021    1.391517
   C    -0.740357    1.549394    0.465811
   C    -0.040727    2.400138   -0.460268
   C     1.713312   -2.071025   -1.394209
   C     0.738749   -1.549259   -0.465790
   C     0.037844   -2.396485    0.464800
   C     0.378612   -3.752949    0.546137
   C     1.297490   -4.285270   -0.381498
   C     1.938852   -3.454767   -1.352246
   H     0.072163    4.442795   -1.272930
   H    -1.528444    5.349304    0.359446
   H    -2.561271    3.964100    2.111778
   H    -2.042704    1.471934    2.257261
   H     0.549291    1.928745   -1.279925
   H     2.032869   -1.468503   -2.262457
   H    -0.527885   -1.918035    1.294318
   H    -0.063812   -4.446783    1.276686
   H     1.534325   -5.348759   -0.359172
   H     2.560760   -3.970591   -2.111804
   N    -0.477509    0.202317    0.479383
   N     0.476174   -0.202217   -0.479462
          24
Simulation Time: t =  374.00
   C    -0.364150    3.759316   -0.527950
   C    -1.292117    4.286401    0.389051
   C    -1.950609    3.450239    1.344931
   C    -1.726340    2.070498    1.378852
   C    -0.744186    1.551438    0.463547
   C    -0.035308    2.404343   -0.452970
   C     1.729251   -2.069318   -1.380906
   C     0.742536   -1.551650   -0.463729
   C     0.032568   -2.401133    0.457624
   C     0.362393   -3.760829    0.528801
   C     1.292062   -4.286650   -0.390656
   C     1.953210   -3.453428   -1.347794
   H     0.090138    4.448791   -1.246660
   H    -1.518139    5.344997    0.374518
   H    -2.576966    3.953401    2.099311
   H    -2.072630    1.462141    2.227956
   H     0.554166    1.931853   -1.265326
   H     2.064534   -1.460459   -2.233265
   H    -0.533969   -1.922526    1.280197
   H    -0.081817   -4.451603    1.250552
   H     1.524523   -5.343868   -0.374458
   H     2.577097   -3.958545   -2.098665
   N    -0.481168    0.205755    0.475469
   N     0.479821   -0.205394   -0.475460
          24
Simulation Time: t =  376.00
   C    -0.347458    3.767755   -0.510598
   C    -1.287390    4.287094    0.398784
   C    -1.964605    3.449331    1.339829
   C    -1.741886    2.068858    1.366209
   C    -0.747700    1.552719    0.461080
   C    -0.030448    2.408881   -0.446426
   C     1.744383   -2.068375   -1.367535
   C     0.745976   -1.553317   -0.461475
   C     0.027906   -2.406066    0.451003
   C     0.346410   -3.768489    0.510979
   C     1.286958   -4.287126   -0.400290
   C     1.967050   -3.452267   -1.342930
   H     0.109807    4.453350   -1.221880
   H    -1.509204    5.345751    0.389789
   H    -2.593994    3.940473    2.085795
   H    -2.104934    1.451959    2.195577
   H     0.560083    1.936531   -1.245868
   H     2.098669   -1.452030   -2.201196
   H    -0.541511   -1.928617    1.261650
   H    -0.101825   -4.455283    1.226105
   H     1.515658   -5.344090   -0.390022
   H     2.595122   -3.944652   -2.085170
   N    -0.484506    0.209146    0.471128
   N     0.483190   -0.208529   -0.471018
          24
Simulation Time: t =  378.00
   C    -0.331073    3.775780   -0.492643
   C    -1.282945    4.286979    0.408960
   C    -1.977959    3.448404    1.334283
   C    -1.756574    2.068071    1.353418
   C    -0.750985    1.553568    0.458418
   C    -0.026216    2.413772   -0.440403
   C     1.758746   -2.068294   -1.354100
   C     0.749029   -1.554087   -0.459006
   C     0.023903   -2.411427    0.444822
   C     0.330692   -3.775724    0.492656
   C     1.282202   -4.286764   -0.410413
   C     1.980199   -3.451017   -1.337510
   H     0.132093    4.457940   -1.199683
   H    -1.501707    5.351957    0.405212
   H    -2.614127    3.926958    2.073067
   H    -2.140160    1.440730    2.161420
   H     0.568573    1.941920   -1.223731
   H     2.135632   -1.442588   -2.167398
   H    -0.551856   -1.935469    1.240647
   H    -0.124571   -4.459138    1.204272
   H     1.507812   -5.349922   -0.405790
   H     2.616593   -3.930626   -2.073188
   N    -0.487534    0.212185    0.466388
   N     0.486340   -0.211678   -0.466154
          24
Simulation Time: t =  380.00
   C    -0.315027    3.783201   -0.474090
   C    -1.278787    4.286343    0.419522
   C    -1.990576    3.447225    1.328186
   C    -1.770390    2.068130    1.340464
   C    -0.754045    1.553841    0.455556
   C    -0.022713    2.419206   -0.434718
   C     1.772170   -2.068870   -1.340452
   C     0.751876   -1.554451   -0.456347
   C     0.020605   -2.417170    0.438856
   C     0.315387   -3.782513    0.473794
   C     1.277764   -4.285885   -0.420921
   C     1.992576   -3.449608   -1.331480
   H     0.157282    4.463409   -1.180250
   H    -1.495135    5.361775    0.420924
   H    -2.638674    3.914280    2.062528
   H    -2.178531    1.428125    2.126415
   H     0.581412    1.946943   -1.201447
   H     2.175599   -1.431822   -2.132553
   H    -0.566389   -1.942181    1.219353
   H    -0.150253   -4.463815    1.185046
   H     1.500529   -5.359555   -0.421757
   H     2.642529   -3.917579   -2.063690
   N    -0.490293    0.214927    0.461289
   N     0.489244   -0.214423   -0.460939
          24
Simulation Time: t =  382.00
   C    -0.299327    3.790023   -0.455041
   C    -1.274940    4.285643    0.430394
   C    -2.002409    3.445709    1.321534
   C    -1.783364    2.068851    1.327350
   C    -0.756869    1.553611    0.452508
   C    -0.019981    2.425224   -0.429144
   C     1.784579   -2.069867   -1.326545
   C     0.754619   -1.554601   -0.453527
   C     0.018034   -2.423244    0.432942
   C     0.300538   -3.788897    0.454465
   C     1.273626   -4.284929   -0.431736
   C     2.004211   -3.448054   -1.324921
   H     0.184930    4.469751   -1.162704
   H    -1.488871    5.371940    0.436824
   H    -2.667843    3.903018    2.054349
   H    -2.219804    1.414444    2.090720
   H     0.599728    1.950818   -1.181098
   H     2.218367   -1.419958   -2.096676
   H    -0.586140   -1.948113    1.199336
   H    -0.178318   -4.469128    1.167397
   H     1.493228   -5.369769   -0.437817
   H     2.672819   -3.905756   -2.056153
   N    -0.492854    0.217258    0.455889
   N     0.491932   -0.216604   -0.455434
          24
Simulation Time: t =  384.00
   C    -0.283998    3.796427   -0.435662
   C    -1.271505    4.285321    0.441608
   C    -2.013511    3.444112    1.314384
   C    -1.795459    2.069809    1.314046
   C    -0.759456    1.553434    0.449112
   C    -0.018053    2.431472   -0.423415
   C     1.796121   -2.071110   -1.312549
   C     0.757162   -1.554326   -0.450459
   C     0.016144   -2.429610    0.427062
   C     0.286001   -3.794902    0.434892
   C     1.269866   -4.284339   -0.442871
   C     2.015247   -3.446363   -1.317987
   H     0.213973    4.476254   -1.145408
   H    -1.482165    5.379242    0.452984
   H    -2.700429    3.892840    2.047104
   H    -2.263299    1.400543    2.053901
   H     0.623662    1.953614   -1.163142
   H     2.263110   -1.407837   -2.059210
   H    -0.611182   -1.953324    1.180954
   H    -0.207661   -4.474331    1.149640
   H     1.485231   -5.377320   -0.453930
   H     2.705983   -3.894658   -2.048908
   N    -0.495223    0.218775    0.450291
   N     0.494499   -0.218354   -0.449721
          24
Simulation Time: t =  386.00
   C    -0.269016    3.802597   -0.416124
   C    -1.268451    4.285701    0.453099
   C    -2.024072    3.442528    1.306967
   C    -1.806749    2.070709    1.300647
   C    -0.761796    1.553325    0.445358
   C    -0.016739    2.437693   -0.417605
   C     1.806902   -2.072246   -1.298545
   C     0.759428   -1.553998   -0.446977
   C     0.014826   -2.435877    0.421120
   C     0.271702   -3.800730    0.415300
   C     1.266592   -4.284460   -0.454388
   C     2.025812   -3.444768   -1.310826
   H     0.243161    4.481916   -1.126406
   H    -1.474679    5.381602    0.469325
   H    -2.734411    3.882855    2.038361
   H    -2.307926    1.387723    2.015045
   H     0.651928    1.956408   -1.146391
   H     2.308689   -1.396577   -2.019389
   H    -0.640338   -1.958667    1.163285
   H    -0.236980   -4.478538    1.129935
   H     1.476197   -5.380044   -0.470038
   H     2.739913   -3.883437   -2.039627
   N    -0.497488    0.219488    0.444563
   N     0.496988   -0.219407   -0.443886
          24
Simulation Time: t =  388.00
   C    -0.254277    3.808559   -0.396643
   C    -1.265772    4.286930    0.464867
   C    -2.034346    3.441049    1.299545
   C    -1.817408    2.071336    1.287308
   C    -0.763823    1.553095    0.441165
   C    -0.015766    2.443709   -0.411874
   C     1.817030   -2.072888   -1.284603
   C     0.761424   -1.553975   -0.442985
   C     0.013871   -2.441611    0.415130
   C     0.257642   -3.806618    0.395810
   C     1.263807   -4.285490   -0.466273
   C     2.036047   -3.443468   -1.303553
   H     0.271340    4.485875   -1.104015
   H    -1.466390    5.378723    0.485875
   H    -2.767450    3.872130    2.025711
   H    -2.352481    1.377372    1.973176
   H     0.682352    1.960754   -1.128798
   H     2.353793   -1.387396   -1.976433
   H    -0.671633   -1.965412    1.144624
   H    -0.265116   -4.481172    1.106851
   H     1.466110   -5.377536   -0.486202
   H     2.772463   -3.871430   -2.026341
   N    -0.499784    0.219597    0.438821
   N     0.499476   -0.219552   -0.438056
          24
Simulation Time: t =  390.00
   C    -0.239936    3.814521   -0.377205
   C    -1.263228    4.289002    0.476717
   C    -2.044532    3.439761    1.292318
   C    -1.827426    2.071328    1.273980
   C    -0.765734    1.553111    0.436626
   C    -0.014793    2.449155   -0.406370
   C     1.826693   -2.072870   -1.270832
   C     0.763139   -1.554047   -0.438501
   C     0.012982   -2.446735    0.409260
   C     0.243754   -3.812543    0.376520
   C     1.261410   -4.287424   -0.478441
   C     2.046143   -3.442436   -1.296321
   H     0.297798    4.487873   -1.077232
   H    -1.457750    5.372167    0.502691
   H    -2.797823    3.860151    2.007534
   H    -2.395742    1.370597    1.927834
   H     0.712343    1.968243   -1.108324
   H     2.397272   -1.381178   -1.929959
   H    -0.702850   -1.974779    1.123304
   H    -0.291369   -4.482173    1.079607
   H     1.455414   -5.371263   -0.502579
   H     2.802041   -3.858361   -2.007875
   N    -0.502147    0.218911    0.433143
   N     0.502067   -0.218988   -0.432294
          24
Simulation Time: t =  392.00
   C    -0.226103    3.820447   -0.357782
   C    -1.260663    4.291746    0.488557
   C    -2.054757    3.438670    1.285383
   C    -1.836850    2.070534    1.260609
   C    -0.767633    1.553475    0.431804
   C    -0.013514    2.453869   -0.401202
   C     1.835991   -2.072108   -1.257213
   C     0.764673   -1.554094   -0.433650
   C     0.011815   -2.451233    0.403686
   C     0.230154   -3.818438    0.357366
   C     1.259161   -4.290101   -0.490706
   C     2.056222   -3.441553   -1.289248
   H     0.322491    4.488426   -1.046030
   H    -1.449409    5.364947    0.519931
   H    -2.824629    3.847029    1.983313
   H    -2.436929    1.367752    1.879145
   H     0.739851    1.979933   -1.083710
   H     2.438467   -1.378148   -1.880218
   H    -0.731984   -1.987638    1.098220
   H    -0.315815   -4.482242    1.048288
   H     1.444920   -5.364243   -0.519350
   H     2.828044   -3.844523   -1.984037
   N    -0.504687    0.217469    0.427626
   N     0.504897   -0.217884   -0.426690
          24
Simulation Time: t =  394.00
   C    -0.212914    3.826178   -0.338251
   C    -1.257838    4.294904    0.500220
   C    -2.065099    3.437546    1.278777
   C    -1.845762    2.069051    1.247137
   C    -0.769620    1.553839    0.426822
   C    -0.011643    2.457990   -0.396502
   C     1.844835   -2.070537   -1.243567
   C     0.766237   -1.554358   -0.428544
   C     0.010151   -2.455002    0.398446
   C     0.217103   -3.824250    0.338150
   C     1.256822   -4.293283   -0.502900
   C     2.066307   -3.440738   -1.282318
   H     0.346049    4.488817   -1.011276
   H    -1.442067    5.360687    0.537802
   H    -2.848136    3.833539    1.953795
   H    -2.475782    1.368357    1.828069
   H     0.763742    1.996064   -1.054828
   H     2.477243   -1.377734   -1.828175
   H    -0.758007   -2.004141    1.069138
   H    -0.339232   -4.482764    1.013871
   H     1.435362   -5.360099   -0.536807
   H     2.850934   -3.830771   -1.955609
   N    -0.507533    0.215597    0.422369
   N     0.508023   -0.216166   -0.421349
          24
Simulation Time: t =  396.00
   C    -0.200537    3.831526   -0.318480
   C    -1.254703    4.298221    0.511703
   C    -2.075367    3.436289    1.272308
   C    -1.854212    2.066982    1.233437
   C    -0.771687    1.554150    0.421720
   C    -0.009105    2.461595   -0.392129
   C     1.853225   -2.068294   -1.229752
   C     0.767954   -1.554777   -0.423283
   C     0.007840   -2.458186    0.393532
   C     0.204815   -3.829796    0.318684
   C     1.254177   -4.296748   -0.514900
   C     2.076305   -3.439792   -1.275463
   H     0.369511    4.490706   -0.974303
   H    -1.436258    5.362093    0.556324
   H    -2.869863    3.820963    1.920887
   H    -2.512592    1.371220    1.775861
   H     0.784209    2.015880   -1.022889
   H     2.513956   -1.378794   -1.775160
   H    -0.780990   -2.023643    1.036881
   H    -0.362699   -4.485411    0.977747
   H     1.427494   -5.361779   -0.555066
   H     2.872306   -3.818333   -1.924241
   N    -0.510776    0.213439    0.417410
   N     0.511521   -0.213931   -0.416316
          24
Simulation Time: t =  398.00
   C    -0.189143    3.836410   -0.298323
   C    -1.251202    4.301614    0.522972
   C    -2.085303    3.434741    1.265694
   C    -1.862220    2.064488    1.219398
   C    -0.773876    1.554452    0.416487
   C    -0.005996    2.464784   -0.387836
   C     1.861227   -2.065593   -1.215713
   C     0.769847   -1.555045   -0.417876
   C     0.004917   -2.461068    0.388815
   C     0.193400   -3.834855    0.298859
   C     1.251151   -4.300397   -0.526683
   C     2.086002   -3.438517   -1.268475
   H     0.393852    4.495625   -0.936401
   H    -1.432009    5.369946    0.575615
   H    -2.892190    3.810736    1.887122
   H    -2.547821    1.374853    1.724013
   H     0.802869    2.037752   -0.990042
   H     2.549088   -1.379983   -1.722543
   H    -0.802271   -2.044703    1.003249
   H    -0.387143   -4.491578    0.941079
   H     1.421494   -5.370084   -0.574197
   H     2.894514   -3.808520   -1.892071
   N    -0.514452    0.211012    0.412803
   N     0.515450   -0.211454   -0.411645
          24
Simulation Time: t =  400.00
   C    -0.178739    3.840690   -0.277791
   C    -1.247524    4.305176    0.534188
   C    -2.094562    3.432855    1.258633
   C    -1.869916    2.061778    1.204994
   C    -0.776045    1.554725    0.411017
   C    -0.002533    2.467746   -0.383292
   C     1.868924   -2.062603   -1.201401
   C     0.771870   -1.555059   -0.412318
   C     0.001534   -2.463841    0.384034
   C     0.182962   -3.839376    0.278636
   C     1.247773   -4.304294   -0.538274
   C     2.095092   -3.436817   -1.261131
   H     0.419654    4.504432   -0.898315
   H    -1.428896    5.382508    0.595453
   H    -2.917428    3.803989    1.854724
   H    -2.582004    1.377734    1.673634
   H     0.822207    2.059608   -0.958855
   H     2.583094   -1.380117   -1.671263
   H    -0.823925   -2.065515    0.970457
   H    -0.412995   -4.501860    0.904303
   H     1.417121   -5.383375   -0.594055
   H     2.919651   -3.802317   -1.861004
   N    -0.518550    0.208333    0.408525
   N     0.519802   -0.208820   -0.407291
          24
Simulation Time: t =  402.00
   C    -0.169348    3.844397   -0.256893
   C    -1.243759    4.309103    0.545413
   C    -2.102956    3.430562    1.250945
   C    -1.877399    2.059050    1.190210
   C    -0.778158    1.554731    0.405298
   C     0.001138    2.470675   -0.378280
   C     1.876469   -2.059533   -1.186838
   C     0.773923   -1.554823   -0.406504
   C    -0.002133   -2.466697    0.378943
   C     0.173417   -3.843335    0.258096
   C     1.244228   -4.308661   -0.549806
   C     2.103395   -3.434653   -1.253245
   H     0.446749    4.516982   -0.860022
   H    -1.426140    5.396511    0.615573
   H    -2.946580    3.801092    1.824729
   H    -2.615289    1.378760    1.625537
   H     0.844375    2.079674   -0.931374
   H     2.615976   -1.378459   -1.621927
   H    -0.847809   -2.084489    0.940391
   H    -0.439881   -4.515773    0.867062
   H     1.413662   -5.398289   -0.614454
   H     2.948427   -3.799928   -1.831863
   N    -0.523060    0.205585    0.404558
   N     0.524544   -0.206003   -0.403260
          24
Simulation Time: t =  404.00
   C    -0.160790    3.847541   -0.235793
   C    -1.240148    4.313574    0.556826
   C    -2.110458    3.428008    1.242608
   C    -1.884884    2.056427    1.175101
   C    -0.780097    1.554257    0.399262
   C     0.004959    2.473769   -0.372686
   C     1.884031   -2.056478   -1.172037
   C     0.775934   -1.554355   -0.400394
   C    -0.006019   -2.469717    0.373368
   C     0.164657   -3.846867    0.237353
   C     1.240667   -4.313691   -0.561375
   C     2.110909   -3.432110   -1.244778
   H     0.474213    4.532011   -0.820639
   H    -1.423059    5.408481    0.635524
   H    -2.978601    3.801383    1.796752
   H    -2.647280    1.377651    1.579756
   H     0.870279    2.096891   -0.908430
   H     2.647168   -1.374982   -1.574622
   H    -0.874564   -2.100692    0.913970
   H    -0.466650   -4.531814    0.828397
   H     1.410385   -5.411204   -0.635058
   H     2.979552   -3.800637   -1.804288
   N    -0.527923    0.202903    0.400839
   N     0.529601   -0.203000   -0.399475
          24
Simulation Time: t =  406.00
   C    -0.153026    3.850434   -0.214562
   C    -1.236560    4.318736    0.568326
   C    -2.117338    3.425219    1.233765
   C    -1.892475    2.053878    1.159668
   C    -0.782033    1.553289    0.393040
   C     0.009103    2.477054   -0.366554
   C     1.891830   -2.053479   -1.157047
   C     0.777873   -1.553491   -0.394016
   C    -0.010280   -2.472991    0.367302
   C     0.156504   -3.850111    0.216563
   C     1.237222   -4.319421   -0.573063
   C     2.117815   -3.429356   -1.235802
   H     0.500514    4.547486   -0.778916
   H    -1.419121    5.415930    0.655077
   H    -3.010844    3.803407    1.769323
   H    -2.676722    1.374942    1.536177
   H     0.898743    2.111219   -0.889546
   H     2.675532   -1.370352   -1.529243
   H    -0.903072   -2.114049    0.890966
   H    -0.491803   -4.547926    0.787108
   H     1.406781   -5.419483   -0.655622
   H     3.010331   -3.802990   -1.776983
   N    -0.533049    0.200317    0.397293
   N     0.534914   -0.199981   -0.395853
          24
Simulation Time: t =  408.00
   C    -0.145871    3.853239   -0.193344
   C    -1.233143    4.324467    0.580029
   C    -2.123821    3.422573    1.224528
   C    -1.900318    2.051254    1.143924
   C    -0.783980    1.551917    0.386660
   C     0.013807    2.480457   -0.359995
   C     1.900042   -2.050611   -1.141879
   C     0.779859   -1.551958   -0.387507
   C    -0.015257   -2.476633    0.360915
   C     0.148838   -3.853197    0.195825
   C     1.233840   -4.325791   -0.584827
   C     2.124468   -3.426422   -1.226535
   H     0.524201    4.561338   -0.733852
   H    -1.414153    5.417977    0.674113
   H    -3.040009    3.805395    1.740812
   H    -2.702277    1.371575    1.494433
   H     0.927033    2.123383   -0.873067
   H     2.699885   -1.365440   -1.485523
   H    -0.930940   -2.125161    0.870190
   H    -0.514199   -4.562213    0.742370
   H     1.402609   -5.422151   -0.676047
   H     3.037570   -3.805358   -1.748425
   N    -0.538360    0.197858    0.393848
   N     0.540415   -0.197206   -0.392317
          24
Simulation Time: t =  410.00
   C    -0.139261    3.856133   -0.172175
   C    -1.229736    4.330589    0.591829
   C    -2.130295    3.420022    1.215081
   C    -1.908523    2.048632    1.127868
   C    -0.786102    1.550013    0.380282
   C     0.019487    2.483993   -0.353180
   C     1.908661   -2.047781   -1.126444
   C     0.782023   -1.549801   -0.381005
   C    -0.021254   -2.480571    0.354330
   C     0.141689   -3.856300    0.175105
   C     1.230464   -4.332507   -0.596626
   C     2.131115   -3.423553   -1.217094
   H     0.544454    4.572141   -0.685296
   H    -1.408231    5.415550    0.692729
   H    -3.063213    3.805858    1.709989
   H    -2.722815    1.368315    1.454478
   H     0.951801    2.134311   -0.857397
   H     2.719410   -1.360923   -1.443597
   H    -0.955335   -2.134833    0.850331
   H    -0.533345   -4.573504    0.694125
   H     1.397972   -5.420078   -0.696254
   H     3.058873   -3.806427   -1.717621
   N    -0.543734    0.195658    0.390381
   N     0.545970   -0.194719   -0.388749
          24
Simulation Time: t =  412.00
   C    -0.133027    3.859023   -0.151123
   C    -1.226586    4.336633    0.603879
   C    -2.136843    3.417838    1.205447
   C    -1.917229    2.046083    1.111501
   C    -0.788255    1.547488    0.373842
   C     0.026355    2.487625   -0.346167
   C     1.917639   -2.045004   -1.110661
   C     0.784528   -1.547199   -0.374569
   C    -0.028434   -2.484735    0.347628
   C     0.135069   -3.859509    0.154334
   C     1.226998   -4.339213   -0.608419
   C     2.137901   -3.420808   -1.207526
   H     0.561402    4.579449   -0.633785
   H    -1.401730    5.411065    0.711087
   H    -3.078880    3.803897    1.676695
   H    -2.738076    1.365499    1.416346
   H     0.970341    2.144733   -0.841217
   H     2.733917   -1.357043   -1.403790
   H    -0.974263   -2.143707    0.830367
   H    -0.549486   -4.581509    0.643063
   H     1.393143   -5.415674   -0.716362
   H     3.073376   -3.805488   -1.684439
   N    -0.549085    0.193909    0.386806
   N     0.551437   -0.192472   -0.385086
          24
Simulation Time: t =  414.00
   C    -0.127215    3.861981   -0.130124
   C    -1.223607    4.342175    0.616100
   C    -2.143491    3.415937    1.195585
   C    -1.926387    2.043742    1.094788
   C    -0.790495    1.544448    0.367396
   C     0.034479    2.491271   -0.338914
   C     1.926958   -2.042327   -1.094480
   C     0.787297   -1.544226   -0.368186
   C    -0.036758   -2.489072    0.340707
   C     0.128946   -3.862793    0.133497
   C     1.223538   -4.345397   -0.620256
   C     2.144723   -3.418310   -1.197747
   H     0.575876    4.583737   -0.580502
   H    -1.395100    5.407722    0.729575
   H    -3.087463    3.799470    1.641700
   H    -2.748479    1.362969    1.380353
   H     0.981613    2.154859   -0.824155
   H     2.743975   -1.353623   -1.366582
   H    -0.987029   -2.152023    0.810138
   H    -0.563613   -4.586826    0.590391
   H     1.388549   -5.412176   -0.736551
   H     3.081906   -3.802518   -1.649816
   N    -0.554284    0.192610    0.383002
   N     0.556711   -0.190520   -0.381209
          24
Simulation Time: t =  416.00
   C    -0.121741    3.864861   -0.109160
   C    -1.221003    4.346826    0.628599
   C    -2.149966    3.414433    1.185322
   C    -1.935948    2.041644    1.077712
   C    -0.792654    1.541328    0.360816
   C     0.043537    2.494826   -0.331245
   C     1.936594   -2.039856   -1.077888
   C     0.790184   -1.540821   -0.361771
   C    -0.046015   -2.493521    0.333375
   C     0.123275   -3.866070    0.112566
   C     1.220230   -4.350579   -0.632191
   C     2.151341   -3.416112   -1.187585
   H     0.589399    4.586231   -0.526825
   H    -1.388798    5.408337    0.748468
   H    -3.091431    3.793400    1.606680
   H    -2.755056    1.360167    1.346915
   H     0.986580    2.164334   -0.806673
   H     2.750850   -1.350046   -1.332506
   H    -0.994416   -2.159573    0.790299
   H    -0.577292   -4.590677    0.537581
   H     1.384437   -5.412392   -0.757123
   H     3.086816   -3.798148   -1.615441
   N    -0.559162    0.191541    0.378874
   N     0.561662   -0.189051   -0.377012
          24
Simulation Time: t =  418.00
   C    -0.116672    3.867600   -0.088140
   C    -1.218711    4.350350    0.641307
   C    -2.155997    3.413185    1.174496
   C    -1.945709    2.039871    1.060198
   C    -0.794793    1.538221    0.354117
   C     0.053199    2.498362   -0.322948
   C     1.946447   -2.037712   -1.060844
   C     0.792997   -1.537278   -0.355240
   C    -0.055826   -2.497962    0.325363
   C     0.117974   -3.869232    0.091559
   C     1.217274   -4.354500   -0.644302
   C     2.157458   -3.414191   -1.176877
   H     0.603553    4.588544   -0.474339
   H    -1.383007    5.414125    0.768011
   H    -3.094569    3.787088    1.573711
   H    -2.759394    1.356167    1.316599
   H     0.987756    2.172420   -0.789931
   H     2.756189   -1.345493   -1.302012
   H    -0.998550   -2.165851    0.771956
   H    -0.592168   -4.594475    0.486099
   H     1.380864   -5.417579   -0.778203
   H     3.091348   -3.793435   -1.583375
   N    -0.563630    0.190706    0.374360
   N     0.566227   -0.187998   -0.372409
          24
Simulation Time: t =  420.00
   C    -0.111887    3.869918   -0.067089
   C    -1.216833    4.352770    0.654245
   C    -2.161331    3.411992    1.163018
   C    -1.955577    2.038584    1.042218
   C    -0.796816    1.535074    0.347282
   C     0.063045    2.502103   -0.313801
   C     1.956252   -2.035874   -1.043249
   C     0.795697   -1.534145   -0.348537
   C    -0.065716   -2.502234    0.316425
   C     0.113030   -3.872261    0.070417
   C     1.214793   -4.357120   -0.656630
   C     2.162827   -3.412585   -1.165465
   H     0.619720    4.592006   -0.424201
   H    -1.377641    5.424074    0.788076
   H    -3.100663    3.782032    1.544728
   H    -2.763121    1.350113    1.289904
   H     0.988545    2.178175   -0.775672
   H     2.761552   -1.339207   -1.275592
   H    -1.002299   -2.170204    0.756320
   H    -0.609440   -4.599289    0.437018
   H     1.377517   -5.426803   -0.799711
   H     3.098713   -3.789490   -1.555264
   N    -0.567645    0.190233    0.369398
   N     0.570314   -0.187095   -0.367364
          24
Simulation Time: t =  422.00
   C    -0.107300    3.871823   -0.045992
   C    -1.215301    4.354336    0.667352
   C    -2.165959    3.410718    1.150863
   C    -1.965299    2.037743    1.023675
   C    -0.798795    1.532382    0.340341
   C     0.072635    2.506051   -0.303588
   C     1.965850   -2.034436   -1.025056
   C     0.798316   -1.531359   -0.341697
   C    -0.075358   -2.506523    0.306416
   C     0.108316   -3.875011    0.049200
   C     1.212774   -4.358671   -0.669132
   C     2.167458   -3.411105   -1.153408
   H     0.638211    4.596931   -0.377080
   H    -1.372299    5.435404    0.808484
   H    -3.112045    3.779055    1.520899
   H    -2.767433    1.341720    1.267147
   H     0.992264    2.180832   -0.765263
   H     2.767959   -1.330925   -1.253267
   H    -1.008263   -2.172141    0.744335
   H    -0.629373   -4.605347    0.390721
   H     1.373910   -5.437376   -0.821349
   H     3.110693   -3.787008   -1.531917
   N    -0.571108    0.189832    0.363943
   N     0.573849   -0.186442   -0.361818
          24
Simulation Time: t =  424.00
   C    -0.102694    3.873370   -0.024901
   C    -1.214123    4.355346    0.680591
   C    -2.170083    3.409370    1.138116
   C    -1.974726    2.037224    1.004508
   C    -0.800753    1.530497    0.333349
   C     0.081711    2.510148   -0.292197
   C     1.975180   -2.033404   -1.006254
   C     0.800909   -1.528943   -0.334781
   C    -0.084583   -2.510985    0.295296
   C     0.103584   -3.877396    0.028021
   C     1.211199   -4.359517   -0.681781
   C     2.171561   -3.409577   -1.140851
   H     0.658280    4.602520   -0.332957
   H    -1.366633    5.444674    0.828950
   H    -3.128433    3.777982    1.502334
   H    -2.772701    1.331487    1.248337
   H     1.000457    2.180297   -0.759377
   H     2.775375   -1.321278   -1.234903
   H    -1.017607   -2.171695    0.736303
   H    -0.651070   -4.611857    0.346952
   H     1.369640   -5.445981   -0.842700
   H     3.126993   -3.785898   -1.513003
   N    -0.574042    0.189379    0.357984
   N     0.576868   -0.186082   -0.355783
          24
Simulation Time: t =  426.00
   C    -0.097689    3.874564   -0.003962
   C    -1.213303    4.356063    0.693925
   C    -2.174147    3.407888    1.125011
   C    -1.983939    2.036987    0.984785
   C    -0.802642    1.529220    0.326294
   C     0.090288    2.514427   -0.279678
   C     1.984112   -2.032549   -0.986817
   C     0.803499   -1.527487   -0.327792
   C    -0.093242   -2.515343    0.283072
   C     0.098595   -3.879636    0.006921
   C     1.210036   -4.359929   -0.694547
   C     2.175514   -3.408129   -1.127946
   H     0.678412    4.607365   -0.291458
   H    -1.360446    5.449126    0.849260
   H    -3.147182    3.777804    1.488154
   H    -2.778554    1.320677    1.232928
   H     1.012385    2.177327   -0.757351
   H     2.783101   -1.311525   -1.219972
   H    -1.029721   -2.169565    0.731462
   H    -0.672772   -4.617274    0.305252
   H     1.364440   -5.449905   -0.863457
   H     3.145066   -3.785161   -1.497648
   N    -0.576468    0.189110    0.351534
   N     0.579349   -0.185664   -0.349264
          24
Simulation Time: t =  428.00
   C    -0.092077    3.875637    0.016788
   C    -1.212748    4.356611    0.707287
   C    -2.178631    3.406412    1.111754
   C    -1.992900    2.036795    0.964553
   C    -0.804468    1.528767    0.319211
   C     0.098486    2.518634   -0.266173
   C     1.992780   -2.031707   -0.966852
   C     0.805888   -1.527002   -0.320652
   C    -0.101400   -2.519344    0.269806
   C     0.092986   -3.881845   -0.013955
   C     1.209398   -4.360015   -0.707467
   C     2.179724   -3.406925   -1.114884
   H     0.696925    4.610027   -0.252166
   H    -1.353817    5.447509    0.869290
   H    -3.164624    3.777145    1.476792
   H    -2.784113    1.310846    1.220291
   H     1.025461    2.173364   -0.757457
   H     2.790126   -1.303262   -1.207812
   H    -1.042382   -2.166995    0.728552
   H    -0.692743   -4.620101    0.265103
   H     1.358317   -5.447862   -0.883462
   H     3.161540   -3.783545   -1.484510
   N    -0.578464    0.188940    0.344620
   N     0.581387   -0.185321   -0.342294
          24
Simulation Time: t =  430.00
   C    -0.085697    3.876763    0.037337
   C    -1.212442    4.356928    0.720649
   C    -2.183917    3.405205    1.098534
   C    -2.001559    2.036393    0.943849
   C    -0.806161    1.529502    0.312052
   C     0.106410    2.522379   -0.251860
   C     2.001354   -2.030836   -0.946508
   C     0.807917   -1.527244   -0.313324
   C    -0.109252   -2.522850    0.255658
   C     0.086410   -3.884056   -0.034470
   C     1.209341   -4.359739   -0.720525
   C     2.184601   -3.406015   -1.101870
   H     0.712633    4.609618   -0.214851
   H    -1.347124    5.440356    0.889135
   H    -3.177359    3.774811    1.466846
   H    -2.788509    1.303434    1.209615
   H     1.036501    2.170100   -0.757376
   H     2.795687   -1.297875   -1.197475
   H    -1.052946   -2.165403    0.725881
   H    -0.709728   -4.619316    0.226235
   H     1.351579   -5.440288   -0.902884
   H     3.173388   -3.779919   -1.472541
   N    -0.580133    0.188710    0.337318
   N     0.583125   -0.185326   -0.334936
          24
Simulation Time: t =  432.00
   C    -0.078489    3.877982    0.057679
   C    -1.212213    4.356855    0.733882
   C    -2.190323    3.404193    1.085525
   C    -2.009974    2.035770    0.922798
   C    -0.807739    1.531136    0.304854
   C     0.114347    2.525577   -0.236979
   C     2.009777   -2.029761   -0.925804
   C     0.809572   -1.528596   -0.305820
   C    -0.116886   -2.525596    0.240764
   C     0.078829   -3.886328   -0.054672
   C     1.209732   -4.358940   -0.733612
   C     2.190403   -3.405507   -1.089021
   H     0.725163    4.606010   -0.179502
   H    -1.340856    5.429761    0.909236
   H    -3.183552    3.770149    1.457263
   H    -2.791265    1.299400    1.200214
   H     1.042829    2.168972   -0.755217
   H     2.799274   -1.296195   -1.188579
   H    -1.059265   -2.165948    0.722067
   H    -0.723315   -4.614818    0.188729
   H     1.344842   -5.429267   -0.922143
   H     3.179131   -3.773759   -1.461079
   N    -0.581624    0.188659    0.329692
   N     0.584670   -0.185494   -0.327257
          24
Simulation Time: t =  434.00
   C    -0.070381    3.879126    0.077785
   C    -1.212124    4.356075    0.746933
   C    -2.197896    3.403447    1.072839
   C    -2.018195    2.034982    0.901512
   C    -0.809036    1.533514    0.297589
   C     0.122360    2.528199   -0.221688
   C     2.017950   -2.028526   -0.904752
   C     0.811006   -1.531067   -0.298258
   C    -0.124429   -2.527676    0.225283
   C     0.070389   -3.888533   -0.074662
   C     1.210228   -4.357458   -0.746505
   C     2.197288   -3.405180   -1.076439
   H     0.735129    4.599882   -0.146234
   H    -1.335663    5.418929    0.930062
   H    -3.183193    3.763170    1.447902
   H    -2.792682    1.298993    1.191269
   H     1.043396    2.170739   -0.749708
   H     2.801081   -1.298275   -1.180687
   H    -1.060472   -2.169185    0.716163
   H    -0.734154   -4.607560    0.152954
   H     1.338778   -5.417919   -0.941807
   H     3.179130   -3.765314   -1.450087
   N    -0.583109    0.188921    0.321812
   N     0.586166   -0.185796   -0.319330
          24
Simulation Time: t =  436.00
   C    -0.061715    3.880261    0.097833
   C    -1.211849    4.354381    0.759577
   C    -2.206535    3.402769    1.060451
   C    -2.026056    2.034089    0.880018
   C    -0.810209    1.536773    0.290354
   C     0.130431    2.530133   -0.206087
   C     2.025870   -2.027369   -0.883450
   C     0.812274   -1.534252   -0.290701
   C    -0.131955   -2.529415    0.209347
   C     0.061259   -3.890355   -0.094522
   C     1.210576   -4.355096   -0.759025
   C     2.205206   -3.404730   -1.064137
   H     0.743901    4.592697   -0.115388
   H    -1.331934    5.410854    0.952287
   H    -3.178399    3.754668    1.439212
   H    -2.793340    1.301730    1.182511
   H     1.038811    2.175439   -0.740716
   H     2.801863   -1.303312   -1.173605
   H    -1.057061   -2.175049    0.708096
   H    -0.743783   -4.599337    0.119369
   H     1.334015   -5.409367   -0.962563
   H     3.175530   -3.755564   -1.440108
   N    -0.584723    0.189382    0.313747
   N     0.587789   -0.186452   -0.311230
          24
Simulation Time: t =  438.00
   C    -0.052625    3.881089    0.117833
   C    -1.211457    4.351603    0.771778
   C    -2.215831    3.402108    1.048294
   C    -2.033554    2.033238    0.858396
   C    -0.811163    1.540757    0.283167
   C     0.138384    2.531601   -0.190181
   C     2.033465   -2.026459   -0.861958
   C     0.813391   -1.538036   -0.283192
   C    -0.139350   -2.530927    0.192979
   C     0.051733   -3.891605   -0.114357
   C     1.210634   -4.351751   -0.771059
   C     2.213834   -3.403964   -1.052029
   H     0.753130    4.586230   -0.087202
   H    -1.329978    5.407273    0.976200
   H    -3.172872    3.746052    1.432381
   H    -2.794305    1.306586    1.173493
   H     1.031381    2.182387   -0.728945
   H     2.802728   -1.309975   -1.167087
   H    -1.050916   -2.182880    0.698359
   H    -0.754129   -4.592306    0.088442
   H     1.330954   -5.405383   -0.984753
   H     3.171810   -3.746007   -1.432211
   N    -0.586611    0.190085    0.305529
   N     0.589667   -0.187497   -0.302993
          24
Simulation Time: t =  440.00
   C    -0.043432    3.881594    0.137936
   C    -1.210666    4.347841    0.783377
   C    -2.225395    3.401094    1.036223
   C    -2.040620    2.032610    0.836709
   C    -0.812092    1.545070    0.276138
   C     0.146037    2.532872   -0.173948
   C     2.040776   -2.025972   -0.840385
   C     0.814226   -1.542303   -0.275712
   C    -0.146377   -2.532290    0.176162
   C     0.042010   -3.892154   -0.134226
   C     1.210459   -4.347471   -0.782613
   C     2.222712   -3.402805   -1.039967
   H     0.764141    4.582027   -0.061799
   H    -1.329643    5.407744    1.001777
   H    -3.170901    3.738956    1.428704
   H    -2.796417    1.312322    1.164169
   H     1.024571    2.190314   -0.716111
   H     2.804772   -1.316747   -1.160969
   H    -1.044927   -2.191534    0.688102
   H    -0.766740   -4.588197    0.060342
   H     1.329609   -5.405641   -1.008358
   H     3.171639   -3.738163   -1.427684
   N    -0.588944    0.191226    0.297229
   N     0.591969   -0.188944   -0.294676
          24
Simulation Time: t =  442.00
   C    -0.034236    3.881677    0.158133
   C    -1.209627    4.343251    0.794446
   C    -2.234714    3.399761    1.024134
   C    -2.047327    2.032292    0.815073
   C    -0.812890    1.549439    0.269271
   C     0.153097    2.534169   -0.157302
   C     2.047878   -2.026058   -0.818828
   C     0.814682   -1.546906   -0.268263
   C    -0.152829   -2.533609    0.158869
   C     0.032200   -3.891971   -0.154147
   C     1.210144   -4.342484   -0.793729
   C     2.231462   -3.401204   -1.027867
   H     0.777358    4.580857   -0.038961
   H    -1.330587    5.409959    1.028362
   H    -3.175579    3.734553    1.428979
   H    -2.800407    1.317800    1.154216
   H     1.022087    2.197790   -0.703900
   H     2.808780   -1.322367   -1.154933
   H    -1.042082   -2.199752    0.678595
   H    -0.782030   -4.587661    0.034847
   H     1.329738   -5.407867   -1.032812
   H     3.177458   -3.733023   -1.427228
   N    -0.591814    0.192896    0.288835
   N     0.594764   -0.190789   -0.286293
          24
Simulation Time: t =  444.00
   C    -0.025039    3.881369    0.178420
   C    -1.208403    4.338167    0.805056
   C    -2.243619    3.398037    1.012021
   C    -2.053790    2.032448    0.793606
   C    -0.813566    1.553626    0.262555
   C     0.159459    2.535660   -0.140276
   C     2.054786   -2.026719   -0.797358
   C     0.814881   -1.551605   -0.260945
   C    -0.158703   -2.534985    0.141174
   C     0.022470   -3.891205   -0.174203
   C     1.209611   -4.337092   -0.804384
   C     2.239970   -3.399203   -1.015730
   H     0.792162    4.582481   -0.018139
   H    -1.332321    5.410714    1.055103
   H    -3.187175    3.732933    1.432859
   H    -2.806581    1.322135    1.143245
   H     1.026272    2.203840   -0.693316
   H     2.814817   -1.326185   -1.148420
   H    -1.044296   -2.206666    0.670613
   H    -0.799099   -4.590161    0.011446
   H     1.330898   -5.408824   -1.057440
   H     3.189108   -3.730599   -1.430582
   N    -0.595280    0.195113    0.280391
   N     0.598114   -0.193082   -0.277844
          24
Simulation Time: t =  446.00
   C    -0.015903    3.880892    0.198818
   C    -1.207065    4.332840    0.815272
   C    -2.252130    3.396076    0.999999
   C    -2.060097    2.033098    0.772405
   C    -0.814136    1.557566    0.256030
   C     0.165216    2.537256   -0.123010
   C     2.061593   -2.027926   -0.776080
   C     0.814985   -1.556041   -0.253846
   C    -0.164240   -2.536634    0.123259
   C     0.012826   -3.889958   -0.194416
   C     1.208776   -4.331629   -0.814588
   C     2.248434   -3.396880   -1.003690
   H     0.807160    4.585858    0.001417
   H    -1.334374    5.407199    1.081060
   H    -3.203065    3.733166    1.438685
   H    -2.814660    1.324980    1.130747
   H     1.037185    2.208313   -0.684100
   H     2.822301   -1.328166   -1.140684
   H    -1.051706   -2.212032    0.663970
   H    -0.816070   -4.594209   -0.010565
   H     1.332653   -5.405659   -1.081466
   H     3.204006   -3.729978   -1.436218
   N    -0.599336    0.197787    0.271856
   N     0.602022   -0.195881   -0.269314
          24
Simulation Time: t =  448.00
   C    -0.006683    3.880282    0.219228
   C    -1.205870    4.327420    0.825219
   C    -2.260414    3.394154    0.988257
   C    -2.066465    2.034236    0.751622
   C    -0.814507    1.561120    0.249668
   C     0.170671    2.538945   -0.105750
   C     2.068319   -2.029507   -0.755063
   C     0.815244   -1.560016   -0.247095
   C    -0.169811   -2.538556    0.105391
   C     0.003340   -3.888509   -0.214844
   C     1.207531   -4.326263   -0.824313
   C     2.257102   -3.394443   -0.991928
   H     0.820617    4.589528    0.020512
   H    -1.336348    5.397876    1.105624
   H    -3.219108    3.733699    1.444144
   H    -2.824043    1.326479    1.115910
   H     1.052796    2.211772   -0.674573
   H     2.830303   -1.328828   -1.130711
   H    -1.062785   -2.216206    0.657416
   H    -0.830815   -4.597967   -0.031965
   H     1.334660   -5.396782   -1.104373
   H     3.218416   -3.729733   -1.442069
   N    -0.603936    0.200868    0.263207
   N     0.606433   -0.199163   -0.260660
          24
Simulation Time: t =  450.00
   C     0.002544    3.879779    0.239707
   C    -1.204648    4.321972    0.834826
   C    -2.268757    3.392297    0.976994
   C    -2.072965    2.035789    0.731321
   C    -0.814923    1.564125    0.243589
   C     0.176311    2.540690   -0.088827
   C     2.075096   -2.031294   -0.734428
   C     0.815713   -1.563470   -0.240745
   C    -0.175778   -2.540587    0.087863
   C    -0.005981   -3.887105   -0.235485
   C     1.205971   -4.320965   -0.833591
   C     2.266090   -3.392185   -0.980613
   H     0.831057    4.592120    0.039927
   H    -1.338043    5.382846    1.128583
   H    -3.231447    3.733044    1.446910
   H    -2.833858    1.327133    1.097972
   H     1.069931    2.215181   -0.662676
   H     2.837738   -1.328881   -1.117546
   H    -1.075149   -2.219883    0.649170
   H    -0.841759   -4.599884   -0.053447
   H     1.336733   -5.382283   -1.125978
   H     3.229024   -3.728552   -1.445987
   N    -0.609008    0.204314    0.254401
   N     0.611280   -0.202838   -0.251825
          24
Simulation Time: t =  452.00
   C     0.011767    3.879381    0.260187
   C    -1.203618    4.316309    0.844127
   C    -2.277141    3.390822    0.966325
   C    -2.079729    2.037588    0.711613
   C    -0.815345    1.566554    0.237799
   C     0.182487    2.542405   -0.072469
   C     2.082072   -2.033191   -0.714264
   C     0.816306   -1.566451   -0.234784
   C    -0.182402   -2.542506    0.070916
   C    -0.015146   -3.885888   -0.256302
   C     1.204331   -4.315581   -0.842477
   C     2.275343   -3.390363   -0.969876
   H     0.837774    4.592907    0.060164
   H    -1.339423    5.363853    1.150232
   H    -3.237739    3.730267    1.445437
   H    -2.843281    1.327530    1.076171
   H     1.085765    2.219341   -0.646337
   H     2.843969   -1.328768   -1.100408
   H    -1.086565   -2.223681    0.637409
   H    -0.848328   -4.599266   -0.075476
   H     1.338849   -5.363892   -1.146455
   H     3.233868   -3.725599   -1.446498
   N    -0.614427    0.208051    0.245344
   N     0.616435   -0.206737   -0.242733
          24
Simulation Time: t =  454.00
   C     0.020829    3.879097    0.280739
   C    -1.202653    4.310288    0.853021
   C    -2.285561    3.389618    0.956287
   C    -2.086808    2.039634    0.692521
   C    -0.815918    1.568339    0.232345
   C     0.189497    2.544103   -0.056870
   C     2.089307   -2.035118   -0.694624
   C     0.816926   -1.569039   -0.229202
   C    -0.189808   -2.544003    0.054727
   C    -0.023994   -3.884976   -0.277312
   C     1.202851   -4.309827   -0.850988
   C     2.284570   -3.389195   -0.959753
   H     0.841032    4.592002    0.081537
   H    -1.340639    5.343836    1.171158
   H    -3.237553    3.725170    1.439177
   H    -2.851886    1.327918    1.050184
   H     1.098332    2.224707   -0.624640
   H     2.848787   -1.328556   -1.078905
   H    -1.095686   -2.227912    0.620995
   H    -0.851196   -4.596520   -0.098269
   H     1.341062   -5.344502   -1.166372
   H     3.232923   -3.720827   -1.442975
   N    -0.620036    0.211981    0.236002
   N     0.621754   -0.210717   -0.233305
          24
Simulation Time: t =  456.00
   C     0.029501    3.878863    0.301344
   C    -1.201922    4.303618    0.861507
   C    -2.293648    3.388856    0.946837
   C    -2.094144    2.041791    0.674027
   C    -0.816583    1.569815    0.227231
   C     0.197333    2.545601   -0.042043
   C     2.096873   -2.037095   -0.675561
   C     0.817449   -1.571137   -0.223971
   C    -0.198003   -2.545060    0.039343
   C    -0.032427   -3.884232   -0.298470
   C     1.201753   -4.303453   -0.859135
   C     2.293391   -3.388701   -0.950185
   H     0.842007    4.590311    0.104120
   H    -1.341909    5.326058    1.192116
   H    -3.232563    3.718382    1.428564
   H    -2.859706    1.328255    1.019875
   H     1.107458    2.231093   -0.597307
   H     2.852629   -1.327930   -1.052930
   H    -1.102567   -2.232457    0.599714
   H    -0.851817   -4.592857   -0.121835
   H     1.343472   -5.327265   -1.186463
   H     3.228144   -3.714887   -1.435871
   N    -0.625658    0.215811    0.226284
   N     0.627094   -0.214747   -0.223478
          24
Simulation Time: t =  458.00
   C     0.037554    3.878561    0.322032
   C    -1.201454    4.296192    0.869557
   C    -2.300999    3.388451    0.937853
   C    -2.101644    2.044014    0.656072
   C    -0.817345    1.571229    0.222460
   C     0.205832    2.546851   -0.027921
   C     2.104650   -2.039060   -0.657052
   C     0.817946   -1.572754   -0.219103
   C    -0.206838   -2.545738    0.024717
   C    -0.040227   -3.883520   -0.319781
   C     1.201037   -4.296346   -0.866884
   C     2.301382   -3.388765   -0.941033
   H     0.842408    4.589211    0.127908
   H    -1.343379    5.312880    1.213644
   H    -3.226262    3.711219    1.415044
   H    -2.867230    1.328179    0.985474
   H     1.114566    2.237745   -0.565475
   H     2.856341   -1.326381   -1.022705
   H    -1.108607   -2.236737    0.574391
   H    -0.852072   -4.589852   -0.146200
   H     1.346079   -5.314419   -1.207324
   H     3.223041   -3.708970   -1.426602
   N    -0.631107    0.219292    0.216146
   N     0.632286   -0.218741   -0.213203
          24
Simulation Time: t =  460.00
   C     0.044898    3.877919    0.342736
   C    -1.201349    4.288083    0.877235
   C    -2.307205    3.388212    0.929167
   C    -2.109279    2.046349    0.638639
   C    -0.818071    1.572458    0.218001
   C     0.214724    2.547992   -0.014316
   C     2.112370   -2.040895   -0.639000
   C     0.818558   -1.574250   -0.214634
   C    -0.216040   -2.546067    0.010694
   C    -0.047140   -3.882702   -0.341234
   C     1.200664   -4.288592   -0.874258
   C     2.308142   -3.389267   -0.932148
   H     0.843892    4.590132    0.152793
   H    -1.345011    5.304804    1.235782
   H    -3.223053    3.705369    1.400602
   H    -2.875285    1.327142    0.947412
   H     1.122427    2.243496   -0.531026
   H     2.860989   -1.323372   -0.988497
   H    -1.116215   -2.239897    0.546370
   H    -0.853750   -4.589059   -0.171350
   H     1.348748   -5.306473   -1.228872
   H     3.221505   -3.704465   -1.416764
   N    -0.636262    0.222472    0.205546
   N     0.637163   -0.222373   -0.202448
          24
Simulation Time: t =  462.00
   C     0.051374    3.876813    0.363454
   C    -1.201645    4.279550    0.884639
   C    -2.311918    3.388026    0.920625
   C    -2.116875    2.048732    0.621626
   C    -0.818726    1.573665    0.213820
   C     0.223647    2.549019   -0.001038
   C     2.119751   -2.042612   -0.621306
   C     0.819425   -1.575836   -0.210588
   C    -0.225345   -2.546214   -0.002877
   C    -0.053035   -3.881570   -0.362798
   C     1.200516   -4.280522   -0.881325
   C     2.313526   -3.389926   -0.923419
   H     0.847658    4.594068    0.178832
   H    -1.346521    5.300342    1.257911
   H    -3.226649    3.702328    1.386980
   H    -2.884725    1.324597    0.906193
   H     1.134255    2.247064   -0.496032
   H     2.867703   -1.318353   -0.950772
   H    -1.127723   -2.241105    0.517212
   H    -0.857908   -4.591420   -0.197419
   H     1.351129   -5.301999   -1.250474
   H     3.226174   -3.702392   -1.407642
   N    -0.640960    0.225208    0.194479
   N     0.641559   -0.225403   -0.191204
          24
Simulation Time: t =  464.00
   C     0.056936    3.875218    0.384122
   C    -1.202408    4.271040    0.891929
   C    -2.315046    3.387859    0.912236
   C    -2.124181    2.051039    0.604862
   C    -0.819233    1.575359    0.209934
   C     0.232209    2.549801    0.012104
   C     2.126725   -2.044300   -0.603990
   C     0.820453   -1.577246   -0.206898
   C    -0.234575   -2.546387   -0.016139
   C    -0.057999   -3.879918   -0.384346
   C     1.200645   -4.272487   -0.888240
   C     2.317571   -3.390515   -0.914803
   H     0.853872    4.600991    0.206269
   H    -1.347522    5.296886    1.278839
   H    -3.238319    3.702775    1.374693
   H    -2.896216    1.320300    0.862246
   H     1.152442    2.247447   -0.461965
   H     2.877129   -1.311264   -0.909872
   H    -1.144667   -2.239783    0.487892
   H    -0.864512   -4.596877   -0.224705
   H     1.352694   -5.298455   -1.271163
   H     3.237498   -3.703137   -1.399220
   N    -0.645114    0.227116    0.182923
   N     0.645440   -0.228016   -0.179485
          24
Simulation Time: t =  466.00
   C     0.061709    3.873145    0.404656
   C    -1.203605    4.262984    0.899256
   C    -2.316861    3.387637    0.904069
   C    -2.131121    2.053182    0.588304
   C    -0.819526    1.577426    0.206282
   C     0.240304    2.550347    0.025166
   C     2.133163   -2.045895   -0.586969
   C     0.821520   -1.578831   -0.203555
   C    -0.243492   -2.546431   -0.029175
   C    -0.062225   -3.877801   -0.405779
   C     1.201161   -4.264863   -0.895172
   C     2.320455   -3.390996   -0.906400
   H     0.861469    4.609699    0.235564
   H    -1.347651    5.291655    1.297563
   H    -3.256355    3.706307    1.362795
   H    -2.909734    1.314717    0.815882
   H     1.177233    2.244417   -0.429198
   H     2.889224   -1.302718   -0.866047
   H    -1.167012   -2.235910    0.458663
   H    -0.872306   -4.604214   -0.253697
   H     1.353076   -5.293275   -1.289785
   H     3.253489   -3.706180   -1.390397
   N    -0.648656    0.228285    0.170924
   N     0.648721   -0.229964   -0.167290
          24
Simulation Time: t =  468.00
   C     0.065930    3.870719    0.424940
   C    -1.205189    4.255643    0.906721
   C    -2.317852    3.387419    0.896279
   C    -2.137624    2.054975    0.571918
   C    -0.819529    1.579636    0.202853
   C     0.247993    2.550586    0.038162
   C     2.139117   -2.047257   -0.570182
   C     0.822364   -1.580958   -0.200499
   C    -0.251979   -2.546097   -0.042009
   C    -0.066025   -3.875322   -0.426951
   C     1.202251   -4.257952   -0.902298
   C     2.322448   -3.391427   -0.898378
   H     0.868558    4.618116    0.267251
   H    -1.346815    5.282852    1.313388
   H    -3.276811    3.711635    1.349425
   H    -2.924663    1.309062    0.767105
   H     1.206497    2.238576   -0.396966
   H     2.903192   -1.294047   -0.819363
   H    -1.193074   -2.230004    0.428624
   H    -0.879380   -4.611629   -0.284777
   H     1.352121   -5.284808   -1.305541
   H     3.270761   -3.710521   -1.379384
   N    -0.651587    0.228950    0.158494
   N     0.651365   -0.231022   -0.154637
          24
Simulation Time: t =  470.00
   C     0.069679    3.868195    0.444946
   C    -1.206928    4.249266    0.914367
   C    -2.318585    3.387278    0.889070
   C    -2.143500    2.056113    0.555556
   C    -0.819347    1.582334    0.199679
   C     0.255425    2.550243    0.051006
   C     2.144767   -2.048414   -0.553696
   C     0.822759   -1.583190   -0.197636
   C    -0.260149   -2.545404   -0.054611
   C    -0.069740   -3.872489   -0.447755
   C     1.203923   -4.251887   -0.909695
   C     2.323988   -3.391674   -0.890829
   H     0.873448    4.624185    0.301843
   H    -1.345215    5.270168    1.326025
   H    -3.295209    3.717326    1.332516
   H    -2.939869    1.304846    0.716076
   H     1.236458    2.231058   -0.363771
   H     2.917860   -1.286881   -0.769905
   H    -1.219957   -2.222988    0.396846
   H    -0.884002   -4.617338   -0.318285
   H     1.349936   -5.272720   -1.318334
   H     3.285793   -3.715069   -1.364469
   N    -0.653896    0.228888    0.145653
   N     0.653424   -0.231551   -0.141576
          24
Simulation Time: t =  472.00
   C     0.073109    3.865569    0.464588
   C    -1.208694    4.243875    0.922197
   C    -2.319575    3.387184    0.882547
   C    -2.148716    2.056511    0.539179
   C    -0.818960    1.585307    0.196750
   C     0.262885    2.549294    0.063654
   C     2.150052   -2.049276   -0.537445
   C     0.822677   -1.585598   -0.194949
   C    -0.268148   -2.544258   -0.066970
   C    -0.073449   -3.869302   -0.468125
   C     1.206056   -4.246701   -0.917364
   C     2.325446   -3.391684   -0.883845
   H     0.875174    4.626619    0.339432
   H    -1.343246    5.254865    1.335990
   H    -3.307968    3.722241    1.310732
   H    -2.954289    1.303429    0.662964
   H     1.262969    2.223122   -0.328202
   H     2.932118   -1.282665   -0.717768
   H    -1.244559   -2.215841    0.362105
   H    -0.885307   -4.620218   -0.354305
   H     1.346968   -5.258276   -1.328555
   H     3.295912   -3.719049   -1.344589
   N    -0.655626    0.228287    0.132436
   N     0.654923   -0.231540   -0.128148
          24
Simulation Time: t =  474.00
   C     0.076213    3.862798    0.483877
   C    -1.210140    4.239363    0.930120
   C    -2.321251    3.386868    0.876680
   C    -2.153237    2.056260    0.522774
   C    -0.818468    1.588049    0.194002
   C     0.270634    2.547832    0.076104
   C     2.154765   -2.049795   -0.521321
   C     0.822255   -1.588365   -0.192472
   C    -0.276105   -2.542631   -0.079085
   C    -0.077034   -3.865724   -0.488074
   C     1.208340   -4.242348   -0.925231
   C     2.327147   -3.391330   -0.877435
   H     0.873886    4.625089    0.379893
   H    -1.341516    5.239511    1.344343
   H    -3.313383    3.725869    1.283620
   H    -2.967091    1.305662    0.608253
   H     1.282955    2.215774   -0.289710
   H     2.945177   -1.282347   -0.663375
   H    -1.264440   -2.209315    0.323899
   H    -0.883460   -4.619965   -0.392799
   H     1.343869   -5.243915   -1.337133
   H     3.300072   -3.722192   -1.319486
   N    -0.656837    0.227550    0.118956
   N     0.655887   -0.230845   -0.114407
          24
Simulation Time: t =  476.00
   C     0.078926    3.859770    0.502782
   C    -1.211260    4.235499    0.938069
   C    -2.323591    3.386313    0.871411
   C    -2.156963    2.055380    0.506265
   C    -0.817803    1.590701    0.191431
   C     0.278609    2.545759    0.088433
   C     2.158867   -2.050120   -0.505331
   C     0.821489   -1.591006   -0.190151
   C    -0.284102   -2.540691   -0.091055
   C    -0.080434   -3.861586   -0.507573
   C     1.210515   -4.238615   -0.933200
   C     2.329264   -3.390369   -0.871489
   H     0.870739    4.620236    0.422831
   H    -1.340649    5.227240    1.352326
   H    -3.312118    3.728365    1.251851
   H    -2.977973    1.311839    0.552338
   H     1.295211    2.209382   -0.248151
   H     2.956690   -1.286354   -0.607222
   H    -1.278597   -2.203692    0.282389
   H    -0.879407   -4.616996   -0.433407
   H     1.341410   -5.232570   -1.345307
   H     3.299128   -3.724788   -1.289837
   N    -0.657624    0.226648    0.105247
   N     0.656449   -0.229886   -0.100422
          24
Simulation Time: t =  478.00
   C     0.081130    3.856337    0.521350
   C    -1.211930    4.232081    0.945957
   C    -2.326442    3.385233    0.866523
   C    -2.159805    2.054129    0.489639
   C    -0.817003    1.593217    0.189023
   C     0.286648    2.543119    0.100755
   C     2.162271   -2.050339   -0.489428
   C     0.820371   -1.593288   -0.187921
   C    -0.291994   -2.538461   -0.103002
   C    -0.083474   -3.856849   -0.526673
   C     1.212412   -4.235228   -0.941159
   C     2.331637   -3.388689   -0.865856
   H     0.867615    4.613425    0.467749
   H    -1.341206    5.220578    1.361062
   H    -3.307005    3.730566    1.216940
   H    -2.987094    1.321546    0.495875
   H     1.300512    2.203805   -0.204415
   H     2.966758   -1.294524   -0.549975
   H    -1.287690   -2.198743    0.238385
   H    -0.874752   -4.612229   -0.475779
   H     1.340246   -5.226523   -1.354126
   H     3.295832   -3.727622   -1.257039
   N    -0.658033    0.225645    0.091361
   N     0.656685   -0.228906   -0.086270
          24
Simulation Time: t =  480.00
   C     0.082827    3.852185    0.539510
   C    -1.212406    4.228895    0.953790
   C    -2.329349    3.383470    0.861789
   C    -2.161852    2.052885    0.472950
   C    -0.815794    1.595156    0.186679
   C     0.294434    2.540090    0.113296
   C     2.164890   -2.050558   -0.473537
   C     0.818726   -1.595341   -0.185751
   C    -0.299372   -2.535882   -0.115098
   C    -0.086084   -3.851448   -0.545387
   C     1.214111   -4.232038   -0.949090
   C     2.333901   -3.386278   -0.860394
   H     0.866647    4.606291    0.514084
   H    -1.343379    5.220374    1.370973
   H    -3.302393    3.733815    1.180890
   H    -2.995051    1.333842    0.439290
   H     1.301458    2.198245   -0.159776
   H     2.975981   -1.306112   -0.492235
   H    -1.293871   -2.193725    0.193016
   H    -0.871313   -4.606852   -0.519412
   H     1.340782   -5.226561   -1.363836
   H     3.293994   -3.731790   -1.222871
   N    -0.658223    0.224948    0.077373
   N     0.656720   -0.227904   -0.071998
          24
Simulation Time: t =  482.00
   C     0.083903    3.847238    0.557337
   C    -1.212726    4.225952    0.961591
   C    -2.331918    3.380781    0.856946
   C    -2.163012    2.052020    0.456223
   C    -0.814165    1.596427    0.184327
   C     0.301571    2.536766    0.126229
   C     2.166680   -2.050928   -0.457639
   C     0.816447   -1.597031   -0.183573
   C    -0.305867   -2.532974   -0.127493
   C    -0.088166   -3.845390   -0.563767
   C     1.215672   -4.229016   -0.957015
   C     2.335691   -3.383128   -0.854936
   H     0.869377    4.599935    0.561444
   H    -1.347034    5.225339    1.381657
   H    -3.302662    3.739488    1.145541
   H    -3.002588    1.347449    0.383136
   H     1.301771    2.191564   -0.115885
   H     2.985097   -1.320019   -0.434572
   H    -1.300015   -2.187667    0.147635
   H    -0.870658   -4.601787   -0.563932
   H     1.343003   -5.231344   -1.374081
   H     3.297224   -3.738262   -1.188843
   N    -0.658263    0.224639    0.063358
   N     0.656645   -0.227030   -0.057674
          24
Simulation Time: t =  484.00
   C     0.084460    3.841462    0.574826
   C    -1.213182    4.223369    0.969481
   C    -2.333790    3.377190    0.851872
   C    -2.163304    2.051757    0.439481
   C    -0.811963    1.597151    0.181969
   C     0.307609    2.533202    0.139707
   C     2.167568   -2.051542   -0.441703
   C     0.813489   -1.598048   -0.181318
   C    -0.311191   -2.529796   -0.140348
   C    -0.089694   -3.838747   -0.581854
   C     1.217162   -4.226222   -0.964981
   C     2.336821   -3.379344   -0.849409
   H     0.876052    4.594349    0.609385
   H    -1.351784    5.232644    1.391913
   H    -3.310350    3.748267    1.111908
   H    -3.010001    1.361475    0.327642
   H     1.305267    2.182597   -0.073882
   H     2.994705   -1.335242   -0.377308
   H    -1.308636   -2.179740    0.103350
   H    -0.873418   -4.597170   -0.608997
   H     1.346680   -5.238129   -1.383818
   H     3.307162   -3.747211   -1.155751
   N    -0.658224    0.224636    0.049307
   N     0.656558   -0.226577   -0.043358
          24
Simulation Time: t =  486.00
   C     0.084590    3.835072    0.592099
   C    -1.213770    4.221289    0.977532
   C    -2.334986    3.372795    0.846497
   C    -2.162702    2.052172    0.422708
   C    -0.809307    1.597224    0.179534
   C     0.312339    2.529461    0.153804
   C     2.167515   -2.052450   -0.425696
   C     0.809972   -1.598193   -0.178944
   C    -0.315296   -2.526391   -0.153737
   C    -0.090658   -3.831705   -0.599744
   C     1.218504   -4.223822   -0.973052
   C     2.337437   -3.375074   -0.843780
   H     0.885429    4.588278    0.657457
   H    -1.357151    5.239031    1.400479
   H    -3.324801    3.759534    1.079970
   H    -3.017096    1.375436    0.273328
   H     1.314102    2.170772   -0.034533
   H     3.004838   -1.351050   -0.320869
   H    -1.320782   -2.169615    0.060828
   H    -0.879203   -4.592209   -0.654279
   H     1.351426   -5.243761   -1.391948
   H     3.322621   -3.757784   -1.123391
   N    -0.658143    0.225009    0.035314
   N     0.656508   -0.226675   -0.029123
          24
Simulation Time: t =  488.00
   C     0.084585    3.828254    0.609210
   C    -1.214654    4.219776    0.985816
   C    -2.335738    3.367865    0.840861
   C    -2.161365    2.053288    0.405896
   C    -0.806209    1.596439    0.176964
   C     0.315823    2.525592    0.168571
   C     2.166381   -2.053529   -0.409523
   C     0.806106   -1.597566   -0.176472
   C    -0.318297   -2.522613   -0.167650
   C    -0.091030   -3.824579   -0.617564
   C     1.219659   -4.221905   -0.981257
   C     2.337815   -3.370683   -0.838137
   H     0.895492    4.579879    0.704998
   H    -1.362668    5.241932    1.406340
   H    -3.342370    3.771488    1.049039
   H    -3.023046    1.389381    0.220548
   H     1.327764    2.156484    0.002163
   H     3.014932   -1.367193   -0.265557
   H    -1.335426   -2.157672    0.019977
   H    -0.886834   -4.585531   -0.699337
   H     1.356904   -5.245861   -1.397567
   H     3.340129   -3.768269   -1.091013
   N    -0.658028    0.225882    0.021433
   N     0.656478   -0.227226   -0.014989
          24
Simulation Time: t =  490.00
   C     0.084610    3.821272    0.626287
   C    -1.215842    4.218782    0.994320
   C    -2.336403    3.362703    0.834985
   C    -2.159424    2.055068    0.389018
   C    -0.802783    1.594710    0.174185
   C     0.318381    2.521521    0.183972
   C     2.164155   -2.054715   -0.393151
   C     0.802105   -1.596163   -0.173881
   C    -0.320516   -2.518342   -0.182038
   C    -0.090823   -3.817648   -0.635442
   C     1.220593   -4.220444   -0.989595
   C     2.338297   -3.366492   -0.832521
   H     0.904265    4.567456    0.751382
   H    -1.368035    5.240129    1.409249
   H    -3.358253    3.781820    1.018292
   H    -3.026794    1.403532    0.169876
   H     1.343238    2.141075    0.036589
   H     3.023889   -1.383633   -0.211851
   H    -1.349903   -2.144916   -0.019513
   H    -0.894869   -4.575653   -0.743675
   H     1.362813   -5.243371   -1.400427
   H     3.355498   -3.776774   -1.057780
   N    -0.657884    0.227282    0.007744
   N     0.656455   -0.228193   -0.000993
          24
Simulation Time: t =  492.00
   C     0.084725    3.814386    0.643488
   C    -1.217368    4.218128    1.002972
   C    -2.337217    3.357726    0.828924
   C    -2.156919    2.057346    0.371999
   C    -0.799144    1.592240    0.171230
   C     0.320344    2.516991    0.199943
   C     2.160998   -2.056019   -0.376556
   C     0.798116   -1.593778   -0.171119
   C    -0.322361   -2.513584   -0.196908
   C    -0.090169   -3.811040   -0.653438
   C     1.221364   -4.219285   -0.998015
   C     2.339139   -3.362707   -0.826956
   H     0.910396    4.550142    0.795873
   H    -1.373157    5.234108    1.409459
   H    -3.368333    3.788447    0.987329
   H    -3.027351    1.418123    0.121762
   H     1.356560    2.126242    0.069326
   H     3.030366   -1.400680   -0.160030
   H    -1.361248   -2.132488   -0.057935
   H    -0.902070   -4.561500   -0.786771
   H     1.369046   -5.236855   -1.400881
   H     3.365387   -3.781758   -1.023358
   N    -0.657670    0.229046   -0.005753
   N     0.656408   -0.229664    0.012810
          24
Simulation Time: t =  494.00
   C     0.084963    3.807706    0.660920
   C    -1.219272    4.217485    1.011647
   C    -2.338262    3.353257    0.822672
   C    -2.153970    2.060018    0.354802
   C    -0.795353    1.589194    0.168118
   C     0.322029    2.511847    0.216424
   C     2.157039   -2.057385   -0.359701
   C     0.794272   -1.590451   -0.168124
   C    -0.324095   -2.508240   -0.212251
   C    -0.089128   -3.804887   -0.671648
   C     1.222061   -4.218119   -1.006410
   C     2.340345   -3.359553   -0.821410
   H     0.913521    4.528026    0.838012
   H    -1.378203    5.225826    1.408037
   H    -3.370430    3.790093    0.956170
   H    -3.024127    1.433166    0.076663
   H     1.364409    2.113515    0.100710
   H     3.033112   -1.418463   -0.110755
   H    -1.367208   -2.121353   -0.095266
   H    -0.907677   -4.542656   -0.828195
   H     1.375650   -5.228286   -1.399909
   H     3.368249   -3.782445   -0.987945
   N    -0.657327    0.231023   -0.019046
   N     0.656263   -0.231585    0.026354
          24
Simulation Time: t =  496.00
   C     0.085228    3.801220    0.678652
   C    -1.221489    4.216450    1.020154
   C    -2.339454    3.349476    0.816216
   C    -2.150617    2.063001    0.337382
   C    -0.791566    1.585526    0.164832
   C     0.323681    2.506070    0.233434
   C     2.152422   -2.058856   -0.342587
   C     0.790622   -1.586456   -0.164935
   C    -0.325799   -2.502252   -0.228075
   C    -0.087764   -3.799172   -0.690104
   C     1.222812   -4.216635   -1.014671
   C     2.341740   -3.357098   -0.815810
   H     0.914360    4.502290    0.877640
   H    -1.383543    5.218160    1.406354
   H    -3.364660    3.786498    0.925299
   H    -3.017198    1.448349    0.034702
   H     1.365061    2.103846    0.130821
   H     3.031419   -1.436860   -0.064260
   H    -1.367007   -2.111974   -0.131460
   H    -0.911661   -4.519628   -0.867669
   H     1.382809   -5.220424   -1.398714
   H     3.364572   -3.778952   -0.952163
   N    -0.656819    0.233260   -0.032090
   N     0.655958   -0.233727    0.039654
          24
Simulation Time: t =  498.00
   C     0.085376    3.794797    0.696716
   C    -1.224012    4.214623    1.028333
   C    -2.340513    3.346482    0.809514
   C    -2.146857    2.066258    0.319740
   C    -0.787868    1.581330    0.161355
   C     0.325328    2.499703    0.250987
   C     2.147292   -2.060533   -0.325250
   C     0.787129   -1.582106   -0.161568
   C    -0.327393   -2.495628   -0.244406
   C    -0.086155   -3.793735   -0.708799
   C     1.223865   -4.214524   -1.022709
   C     2.342940   -3.355341   -0.810033
   H     0.914548    4.474962    0.914870
   H    -1.389525    5.213923    1.405751
   H    -3.353431    3.778567    0.895367
   H    -3.007395    1.462936   -0.004183
   H     1.358918    2.097356    0.159514
   H     3.025333   -1.455264   -0.020857
   H    -1.361438   -2.104285   -0.166159
   H    -0.914729   -4.493774   -0.905212
   H     1.390665   -5.215909   -1.398528
   H     3.356734   -3.772297   -0.916903
   N    -0.656080    0.235698   -0.044834
   N     0.655409   -0.235842    0.052696
          24
Simulation Time: t =  500.00
   C     0.085149    3.788317    0.715138
   C    -1.226707    4.211821    1.036093
   C    -2.341087    3.344199    0.802482
   C    -2.142552    2.069769    0.301898
   C    -0.784426    1.577051    0.157767
   C     0.326827    2.492804    0.269074
   C     2.141805   -2.062631   -0.307747
   C     0.783735   -1.577436   -0.157986
   C    -0.328720   -2.488517   -0.261354
   C    -0.084377   -3.788293   -0.727665
   C     1.225426   -4.211624   -1.030475
   C     2.343526   -3.354101   -0.803959
   H     0.916145    4.448441    0.950084
   H    -1.396344    5.214626    1.406977
   H    -3.341010    3.768142    0.867133
   H    -2.996101    1.475931   -0.040315
   H     1.348341    2.093348    0.186686
   H     3.015594   -1.472721    0.019697
   H    -1.352743   -2.097708   -0.198971
   H    -0.918090   -4.467028   -0.940964
   H     1.399161   -5.216060   -1.399910
   H     3.348362   -3.764109   -0.883186
   N    -0.655032    0.237983   -0.057308
   N     0.654557   -0.237916    0.065439
          24
Simulation Time: t =  502.00
   C     0.084391    3.781597    0.733906
   C    -1.229593    4.208040    1.043432
   C    -2.340740    3.342563    0.795065
   C    -2.137596    2.073511    0.283902
   C    -0.781318    1.573034    0.154109
   C     0.327906    2.485488    0.287685
   C     2.136101   -2.065362   -0.290153
   C     0.780389   -1.572589   -0.154170
   C    -0.329582   -2.481161   -0.279012
   C    -0.082546   -3.782525   -0.746618
   C     1.227685   -4.207970   -1.037990
   C     2.343111   -3.353140   -0.797453
   H     0.920846    4.424812    0.983750
   H    -1.403893    5.219694    1.409971
   H    -3.332406    3.757548    0.841253
   H    -2.984826    1.486332   -0.074104
   H     1.337166    2.090549    0.212051
   H     3.003456   -1.488102    0.057510
   H    -1.344051   -2.091365   -0.229444
   H    -0.922808   -4.441224   -0.975248
   H     1.408017   -5.220296   -1.402847
   H     3.343350   -3.756232   -0.851746
   N    -0.653628    0.239895   -0.069516
   N     0.653376   -0.239854    0.077848
          24
Simulation Time: t =  504.00
   C     0.083122    3.774481    0.752977
   C    -1.232663    4.203484    1.050410
   C    -2.339242    3.341364    0.787213
   C    -2.132006    2.077556    0.265806
   C    -0.778602    1.569240    0.150327
   C     0.328343    2.478022    0.306882
   C     2.130096   -2.068754   -0.272521
   C     0.777238   -1.568108   -0.150266
   C    -0.329709   -2.473665   -0.297370
   C    -0.080655   -3.776310   -0.765654
   C     1.230579   -4.203848   -1.045339
   C     2.341522   -3.352245   -0.790398
   H     0.929122    4.405190    1.016090
   H    -1.411753    5.226670    1.413992
   H    -3.331498    3.748730    0.818143
   H    -2.974798    1.493541   -0.106032
   H     1.329738    2.087386    0.235394
   H     2.990229   -1.500504    0.092986
   H    -1.338627   -2.084222   -0.257554
   H    -0.929328   -4.417710   -1.008293
   H     1.416689   -5.226359   -1.406687
   H     3.344328   -3.750023   -0.823066
   N    -0.651828    0.241458   -0.081392
   N     0.651788   -0.241257    0.089993
          24
Simulation Time: t =  506.00
   C     0.081518    3.766894    0.772349
   C    -1.235991    4.198500    1.057135
   C    -2.336607    3.340547    0.778895
   C    -2.125846    2.081875    0.247626
   C    -0.776230    1.565898    0.146478
   C     0.327923    2.470530    0.326649
   C     2.123734   -2.072764   -0.254872
   C     0.774494   -1.564107   -0.146288
   C    -0.329061   -2.466305   -0.316464
   C    -0.078747   -3.769504   -0.784762
   C     1.233934   -4.199585   -1.052589
   C     2.338894   -3.351300   -0.782725
   H     0.939899    4.389414    1.047078
   H    -1.419377    5.232330    1.418041
   H    -3.339213    3.742452    0.798023
   H    -2.966489    1.497536   -0.136159
   H     1.329211    2.082679    0.256534
   H     2.977159   -1.509270    0.126338
   H    -1.338444   -2.075707   -0.283255
   H    -0.937146   -4.397067   -1.040288
   H     1.424561   -5.231331   -1.410616
   H     3.351392   -3.745904   -0.797248
   N    -0.649648    0.242545   -0.092953
   N     0.649799   -0.242057    0.101850
          24
Simulation Time: t =  508.00
   C     0.079692    3.759001    0.792103
   C    -1.239479    4.193452    1.063733
   C    -2.333192    3.340166    0.770061
   C    -2.119123    2.086314    0.229359
   C    -0.774242    1.563438    0.142675
   C     0.326643    2.462904    0.346890
   C     2.117031   -2.077367   -0.237209
   C     0.772399   -1.560466   -0.142214
   C    -0.327872   -2.459350   -0.336372
   C    -0.076929   -3.761997   -0.803911
   C     1.237496   -4.195524   -1.059807
   C     2.335676   -3.350134   -0.774401
   H     0.950936    4.376477    1.076136
   H    -1.426268    5.233798    1.421256
   H    -3.352969    3.738096    0.780916
   H    -2.959571    1.498860   -0.164218
   H     1.336051    2.076166    0.275726
   H     2.964914   -1.514345    0.157879
   H    -1.343343   -2.066031   -0.306655
   H    -0.945074   -4.379271   -1.071206
   H     1.431168   -5.232706   -1.413985
   H     3.362012   -3.743325   -0.774329
   N    -0.647067    0.242872   -0.104272
   N     0.647412   -0.242362    0.113395
          24
Simulation Time: t =  510.00
   C     0.077890    3.750845    0.812271
   C    -1.243037    4.188591    1.070266
   C    -2.329596    3.340282    0.760692
   C    -2.112010    2.090747    0.210969
   C    -0.772639    1.561759    0.138872
   C     0.324856    2.455183    0.367581
   C     2.110069   -2.082429   -0.219543
   C     0.770944   -1.557470   -0.138113
   C    -0.326385   -2.452724   -0.356998
   C    -0.075333   -3.753846   -0.823151
   C     1.241186   -4.191863   -1.067038
   C     2.332316   -3.348849   -0.765379
   H     0.959629    4.365025    1.102775
   H    -1.432145    5.229467    1.423353
   H    -3.367947    3.734254    0.766783
   H    -2.953179    1.498499   -0.189663
   H     1.347766    2.068696    0.293257
   H     2.953627   -1.516081    0.187545
   H    -1.351128   -2.056055   -0.328107
   H    -0.951536   -4.363814   -1.100882
   H     1.436268   -5.229192   -1.416564
   H     3.372235   -3.741224   -0.754311
   N    -0.644142    0.242552   -0.115307
   N     0.644654   -0.241995    0.124650
          24
Simulation Time: t =  512.00
   C     0.076318    3.742499    0.832876
   C    -1.246436    4.184074    1.076771
   C    -2.326466    3.340816    0.750757
   C    -2.104749    2.095062    0.192411
   C    -0.771490    1.560578    0.135017
   C     0.323087    2.447427    0.388724
   C     2.103038   -2.087814   -0.201850
   C     0.769958   -1.555417   -0.134091
   C    -0.324836   -2.446145   -0.378232
   C    -0.074083   -3.745234   -0.842535
   C     1.244962   -4.188629   -1.074305
   C     2.329200   -3.347569   -0.755632
   H     0.963764    4.353967    1.126433
   H    -1.436977    5.219475    1.424450
   H    -3.379274    3.729547    0.755476
   H    -2.946070    1.497752   -0.212070
   H     1.360311    2.061561    0.309707
   H     2.942888   -1.515329    0.215056
   H    -1.358640   -2.046991   -0.347972
   H    -0.955075   -4.350108   -1.129076
   H     1.439939   -5.221072   -1.418620
   H     3.378302   -3.738479   -0.737353
   N    -0.640975    0.241821   -0.126045
   N     0.641599   -0.240822    0.135700
          24
Simulation Time: t =  514.00
   C     0.075052    3.734087    0.853973
   C    -1.249496    4.179850    1.083229
   C    -2.324170    3.341845    0.740245
   C    -2.097511    2.099040    0.173641
   C    -0.770746    1.560018    0.131145
   C     0.321685    2.439535    0.410194
   C     2.096272   -2.093389   -0.184073
   C     0.769161   -1.554187   -0.130107
   C    -0.323507   -2.439474   -0.400010
   C    -0.073354   -3.736209   -0.862089
   C     1.248865   -4.185668   -1.081538
   C     2.326581   -3.346438   -0.745179
   H     0.961960    4.342730    1.147066
   H    -1.441048    5.205632    1.425370
   H    -3.383666    3.723137    0.746825
   H    -2.937352    1.497606   -0.230867
   H     1.369661    2.056000    0.325636
   H     2.932034   -1.513175    0.240018
   H    -1.363042   -2.039896   -0.366489
   H    -0.954781   -4.337772   -1.155672
   H     1.442562   -5.210060   -1.420916
   H     3.377890   -3.734398   -0.723577
   N    -0.637608    0.240596   -0.136512
   N     0.638306   -0.239015    0.146480
          24
Simulation Time: t =  516.00
   C     0.074043    3.725695    0.875547
   C    -1.252030    4.175760    1.089581
   C    -2.322831    3.343254    0.729134
   C    -2.090479    2.102618    0.154672
   C    -0.770345    1.560047    0.127298
   C     0.320862    2.431447    0.431910
   C     2.089945   -2.098979   -0.166119
   C     0.768498   -1.553508   -0.126152
   C    -0.322647   -2.432655   -0.422296
   C    -0.073072   -3.726898   -0.881860
   C     1.252630   -4.182758   -1.088643
   C     2.324663   -3.345484   -0.734058
   H     0.954344    4.331635    1.165054
   H    -1.444793    5.191041    1.427252
   H    -3.380130    3.715014    0.740611
   H    -2.926647    1.498648   -0.246122
   H     1.373154    2.052630    0.341609
   H     2.920563   -1.510697    0.262119
   H    -1.362771   -2.035286   -0.383887
   H    -0.950547   -4.326851   -1.180689
   H     1.444739   -5.198935   -1.424381
   H     3.370744   -3.728944   -0.712996
   N    -0.634141    0.238943   -0.146752
   N     0.634892   -0.236847    0.156993
          24
Simulation Time: t =  518.00
   C     0.073239    3.717158    0.897482
   C    -1.254075    4.171561    1.095728
   C    -2.322290    3.344866    0.717431
   C    -2.083933    2.105956    0.135611
   C    -0.770002    1.560339    0.123456
   C     0.320684    2.423274    0.453822
   C     2.084027   -2.104254   -0.147899
   C     0.767948   -1.553467   -0.122240
   C    -0.322281   -2.425535   -0.444929
   C    -0.072911   -3.717494   -0.901940
   C     1.255976   -4.179620   -1.095509
   C     2.323367   -3.344892   -0.722355
   H     0.942624    4.321863    1.181477
   H    -1.448713    5.179126    1.431391
   H    -3.370009    3.705995    0.736569
   H    -2.914494    1.500730   -0.258506
   H     1.369980    2.051485    0.357891
   H     2.908344   -1.508547    0.281102
   H    -1.357911   -2.032970   -0.400483
   H    -0.943148   -4.317743   -1.204470
   H     1.447030   -5.190409   -1.430149
   H     3.358783   -3.722846   -0.705380
   N    -0.630653    0.237111   -0.156754
   N     0.631409   -0.234345    0.167237
          24
Simulation Time: t =  520.00
   C     0.072345    3.708357    0.919653
   C    -1.255534    4.167092    1.101603
   C    -2.322239    3.346349    0.705089
   C    -2.077941    2.109298    0.116614
   C    -0.769587    1.560635    0.119583
   C     0.321098    2.415124    0.475913
   C     2.078452   -2.109015   -0.129378
   C     0.767533   -1.553939   -0.118392
   C    -0.322325   -2.418082   -0.467820
   C    -0.072506   -3.708184   -0.922371
   C     1.258573   -4.176073   -1.102077
   C     2.322495   -3.344652   -0.710147
   H     0.929658    4.315224    1.197617
   H    -1.453097    5.172344    1.438702
   H    -3.356697    3.697490    0.734506
   H    -2.902303    1.502975   -0.269135
   H     1.361158    2.051924    0.374715
   H     2.895826   -1.506994    0.297182
   H    -1.350144   -2.032165   -0.416514
   H    -0.933916   -4.311130   -1.227468
   H     1.449822   -5.186216   -1.438817
   H     3.345668   -3.717400   -0.700366
   N    -0.627269    0.235349   -0.166522
   N     0.627965   -0.231698    0.177266
          24
Simulation Time: t =  522.00
   C     0.071144    3.699127    0.941914
   C    -1.256622    4.162270    1.107176
   C    -2.322154    3.347639    0.692169
   C    -2.072512    2.112808    0.097842
   C    -0.768823    1.560898    0.115720
   C     0.321757    2.407067    0.498101
   C     2.073261   -2.113213   -0.110571
   C     0.767082   -1.554665   -0.114574
   C    -0.322530   -2.410354   -0.490873
   C    -0.071688   -3.699021   -0.943146
   C     1.260397   -4.172053   -1.108315
   C     2.321687   -3.344741   -0.697535
   H     0.918375    4.313316    1.214731
   H    -1.457855    5.171051    1.449467
   H    -3.344770    3.691303    0.734090
   H    -2.891825    1.504210   -0.279236
   H     1.349734    2.052639    0.392118
   H     2.883944   -1.505943    0.310932
   H    -1.342419   -2.031642   -0.432085
   H    -0.924313   -4.307515   -1.250322
   H     1.453128   -5.186216   -1.450354
   H     3.335773   -3.714051   -0.697539
   N    -0.624053    0.233768   -0.176071
   N     0.624653   -0.229210    0.187027
          24
Simulation Time: t =  524.00
   C     0.069454    3.689506    0.964213
   C    -1.257287    4.157267    1.112516
   C    -2.321686    3.348440    0.678635
   C    -2.067610    2.116674    0.079415
   C    -0.767739    1.561042    0.111888
   C     0.322371    2.399235    0.520351
   C     2.068454   -2.116836   -0.091521
   C     0.766430   -1.555472   -0.110775
   C    -0.322567   -2.402318   -0.513985
   C    -0.070326   -3.690162   -0.964273
   C     1.261496   -4.167586   -1.114234
   C     2.320596   -3.345185   -0.684622
   H     0.910426    4.316668    1.233563
   H    -1.462551    5.173404    1.463034
   H    -3.338594    3.688824    0.735108
   H    -2.884518    1.503572   -0.289754
   H     1.339798    2.052045    0.409929
   H     2.873890   -1.505061    0.323103
   H    -1.337836   -2.030089   -0.447388
   H    -0.915427   -4.307010   -1.273393
   H     1.456665   -5.188464   -1.464101
   H     3.332540   -3.713797   -0.696454
   N    -0.621061    0.232499   -0.185406
   N     0.621544   -0.227161    0.196487
          24
Simulation Time: t =  526.00
   C     0.067401    3.679586    0.986508
   C    -1.257851    4.152231    1.117663
   C    -2.320563    3.348884    0.664638
   C    -2.063297    2.120893    0.061390
   C    -0.766107    1.561043    0.108127
   C     0.322523    2.391624    0.542570
   C     2.064130   -2.120036   -0.072321
   C     0.765351   -1.556184   -0.107018
   C    -0.322224   -2.394008   -0.537062
   C    -0.068520   -3.681638   -0.985736
   C     1.262079   -4.162838   -1.119896
   C     2.319109   -3.345971   -0.671469
   H     0.905626    4.324235    1.254178
   H    -1.466589    5.176083    1.478261
   H    -3.340154    3.690604    0.737029
   H    -2.880898    1.500955   -0.301320
   H     1.335267    2.048669    0.428119
   H     2.866787   -1.503941    0.334453
   H    -1.338396   -2.026623   -0.462595
   H    -0.907710   -4.309114   -1.296838
   H     1.459990   -5.190061   -1.478936
   H     3.336801   -3.716694   -0.696602
   N    -0.618355    0.231739   -0.194528
   N     0.618718   -0.225816    0.205641
          24
Simulation Time: t =  528.00
   C     0.065092    3.669715    1.008891
   C    -1.258271    4.147393    1.122713
   C    -2.318955    3.348985    0.650235
   C    -2.059593    2.125382    0.043765
   C    -0.764063    1.560795    0.104406
   C     0.322141    2.384219    0.564680
   C     2.060320   -2.122953   -0.053078
   C     0.763664   -1.556814   -0.103349
   C    -0.321463   -2.385314   -0.559954
   C    -0.066364   -3.673545   -1.007534
   C     1.262401   -4.157941   -1.125352
   C     2.317357   -3.347230   -0.658143
   H     0.902262    4.333642    1.276132
   H    -1.469341    5.175764    1.493830
   H    -3.348147    3.695855    0.739250
   H    -2.880447    1.497049   -0.313921
   H     1.338008    2.041863    0.446682
   H     2.863379   -1.502239    0.345551
   H    -1.344001   -2.021083   -0.478033
   H    -0.901072   -4.312861   -1.320585
   H     1.462682   -5.188286   -1.493884
   H     3.346293   -3.721723   -0.697508
   N    -0.615901    0.231683   -0.203391
   N     0.616145   -0.225273    0.214472
          24
Simulation Time: t =  530.00
   C     0.062887    3.660082    1.031356
   C    -1.258833    4.142860    1.127697
   C    -2.317180    3.349039    0.635636
   C    -2.056647    2.129983    0.026493
   C    -0.761513    1.560200    0.100766
   C     0.321301    2.376946    0.586598
   C     2.057032   -2.125738   -0.033906
   C     0.761335   -1.557333   -0.099816
   C    -0.320456   -2.376150   -0.582546
   C    -0.063954   -3.665957   -1.029648
   C     1.262637   -4.153004   -1.130637
   C     2.315657   -3.349046   -0.644702
   H     0.898110    4.342030    1.298814
   H    -1.470506    5.170165    1.508729
   H    -3.358610    3.702969    0.740764
   H    -2.881783    1.493197   -0.327387
   H     1.346960    2.031984    0.465996
   H     2.863674   -1.500009    0.356798
   H    -1.352592   -2.014011   -0.494204
   H    -0.895005   -4.316957   -1.344462
   H     1.464452   -5.181358   -1.508132
   H     3.356800   -3.727257   -0.698500
   N    -0.613726    0.232555   -0.211986
   N     0.613835   -0.225649    0.222995
          24
Simulation Time: t =  532.00
   C     0.060845    3.651074    1.053996
   C    -1.259490    4.138615    1.132628
   C    -2.315627    3.349316    0.620989
   C    -2.054423    2.134414    0.009516
   C    -0.758658    1.559393    0.097216
   C     0.320319    2.369566    0.608151
   C     2.054352   -2.128508   -0.014892
   C     0.758358   -1.557681   -0.096431
   C    -0.319469   -2.366594   -0.604771
   C    -0.061506   -3.658787   -1.052023
   C     1.262970   -4.148049   -1.135750
   C     2.314340   -3.351479   -0.631197
   H     0.891388    4.346834    1.321805
   H    -1.470086    5.158557    1.522544
   H    -3.366937    3.710015    0.740530
   H    -2.883189    1.490819   -0.341186
   H     1.358665    2.020220    0.486652
   H     2.866854   -1.497830    0.368237
   H    -1.361152   -2.006266   -0.511594
   H    -0.888717   -4.319975   -1.368281
   H     1.465391   -5.168981   -1.521484
   H     3.364196   -3.731704   -0.698842
   N    -0.611714    0.234349   -0.220263
   N     0.611686   -0.226995    0.231153
          24
Simulation Time: t =  534.00
   C     0.059107    3.642796    1.076785
   C    -1.260349    4.134521    1.137451
   C    -2.314558    3.350079    0.606510
   C    -2.052936    2.138479   -0.007240
   C    -0.755565    1.558485    0.093829
   C     0.319516    2.361952    0.629239
   C     2.052220   -2.131242    0.003901
   C     0.755022   -1.557767   -0.093158
   C    -0.318731   -2.356768   -0.626625
   C    -0.059046   -3.652046   -1.074623
   C     1.263307   -4.142996   -1.140674
   C     2.313617   -3.354458   -0.617662
   H     0.881368    4.346490    1.345053
   H    -1.468507    5.142129    1.535367
   H    -3.369609    3.715446    0.737579
   H    -2.883237    1.491123   -0.355153
   H     1.368925    2.007987    0.509266
   H     2.871503   -1.496646    0.379723
   H    -1.367094   -1.998564   -0.530575
   H    -0.881558   -4.320697   -1.391889
   H     1.465752   -5.152310   -1.534054
   H     3.365861   -3.733995   -0.697839
   N    -0.609774    0.237024   -0.228220
   N     0.609593   -0.229408    0.238918
          24
Simulation Time: t =  536.00
   C     0.057586    3.635302    1.099673
   C    -1.261441    4.130310    1.142067
   C    -2.314017    3.351521    0.592363
   C    -2.052057    2.142023   -0.023773
   C    -0.752339    1.557737    0.090676
   C     0.319098    2.353949    0.649712
   C     2.050605   -2.133937    0.022369
   C     0.751556   -1.557543   -0.089924
   C    -0.318355   -2.346967   -0.648149
   C    -0.056633   -3.645553   -1.097357
   C     1.263589   -4.137693   -1.145368
   C     2.313496   -3.357841   -0.604070
   H     0.868697    4.340703    1.368988
   H    -1.466472    5.123409    1.548006
   H    -3.365117    3.718537    0.731139
   H    -2.881229    1.494572   -0.369311
   H     1.374314    1.996417    0.534372
   H     2.876122   -1.497359    0.391099
   H    -1.368844   -1.991308   -0.551325
   H    -0.873293   -4.318402   -1.415451
   H     1.466068   -5.133692   -1.546648
   H     3.361239   -3.733917   -0.694857
   N    -0.607736    0.240404   -0.235824
   N     0.607415   -0.232877    0.246210
          24
Simulation Time: t =  538.00
   C     0.056117    3.628454    1.122556
   C    -1.262788    4.125654    1.146332
   C    -2.313836    3.353693    0.578691
   C    -2.051592    2.145032   -0.040043
   C    -0.749082    1.557254    0.087783
   C     0.319146    2.345544    0.669513
   C     2.049326   -2.136595    0.040410
   C     0.748296   -1.557177   -0.086767
   C    -0.318293   -2.337427   -0.669365
   C    -0.054188   -3.639165   -1.120099
   C     1.263703   -4.131984   -1.149791
   C     2.313779   -3.361383   -0.590424
   H     0.855205    4.330495    1.394453
   H    -1.464869    5.105725    1.561477
   H    -3.354278    3.719449    0.720808
   H    -2.877386    1.500886   -0.384166
   H     1.373053    1.986086    0.562214
   H     2.879491   -1.500543    0.402538
   H    -1.366165   -1.984462   -0.573959
   H    -0.864344   -4.313039   -1.439437
   H     1.466919   -5.115998   -1.560034
   H     3.351817   -3.731993   -0.689612
   N    -0.605461    0.244409   -0.243015
   N     0.604996   -0.237220    0.253030
          24
Simulation Time: t =  540.00
   C     0.054586    3.621880    1.145255
   C    -1.264494    4.120301    1.150139
   C    -2.313676    3.356503    0.565520
   C    -2.051393    2.147671   -0.055941
   C    -0.745765    1.557000    0.085153
   C     0.319514    2.336917    0.688655
   C     2.048268   -2.139252    0.057905
   C     0.745289   -1.556982   -0.083783
   C    -0.318263   -2.328253   -0.690192
   C    -0.051686   -3.632684   -1.142714
   C     1.263822   -4.125711   -1.153866
   C     2.313998   -3.364950   -0.576755
   H     0.843479    4.317746    1.422497
   H    -1.464514    5.091854    1.576825
   H    -3.340056    3.719203    0.706564
   H    -2.872698    1.509058   -0.400360
   H     1.365558    1.976814    0.592677
   H     2.880959   -1.506211    0.414268
   H    -1.360115   -1.977529   -0.598556
   H    -0.855682   -4.305140   -1.464560
   H     1.468795   -5.101568   -1.575096
   H     3.340657   -3.729517   -0.681889
   N    -0.602871    0.249040   -0.249719
   N     0.602240   -0.242177    0.259376
          24
Simulation Time: t =  542.00
   C     0.052630    3.615398    1.167635
   C    -1.266435    4.114137    1.153463
   C    -2.313076    3.359811    0.552879
   C    -2.051037    2.149984   -0.071360
   C    -0.742589    1.557383    0.082900
   C     0.319861    2.328138    0.707091
   C     2.047407   -2.142130    0.074754
   C     0.742459   -1.556972   -0.081029
   C    -0.317957   -2.319630   -0.710593
   C    -0.049232   -3.625819   -1.165077
   C     1.264227   -4.118824   -1.157523
   C     2.313652   -3.368306   -0.563103
   H     0.835955    4.304464    1.454210
   H    -1.465907    5.083061    1.594222
   H    -3.326917    3.719381    0.688739
   H    -2.868552    1.517866   -0.418759
   H     1.354215    1.967711    0.625563
   H     2.880614   -1.513891    0.426846
   H    -1.352594   -1.969711   -0.625124
   H    -0.848381   -4.295525   -1.491477
   H     1.471977   -5.091422   -1.592047
   H     3.331550   -3.727888   -0.671807
   N    -0.599829    0.253965   -0.255959
   N     0.599046   -0.247683    0.265193
          24
Simulation Time: t =  544.00
   C     0.050120    3.608706    1.189522
   C    -1.268589    4.107285    1.156384
   C    -2.311641    3.363451    0.540731
   C    -2.050173    2.152061   -0.086170
   C    -0.739686    1.558715    0.081120
   C     0.319745    2.319470    0.724868
   C     2.046680   -2.145457    0.090814
   C     0.739721   -1.557180   -0.078565
   C    -0.317073   -2.311713   -0.730521
   C    -0.046914   -3.618288   -1.187074
   C     1.265155   -4.111430   -1.160784
   C     2.312393   -3.371240   -0.549448
   H     0.833944    4.291874    1.490302
   H    -1.469200    5.078369    1.613074
   H    -3.319265    3.721629    0.667740
   H    -2.866207    1.526147   -0.440023
   H     1.342671    1.957495    0.660431
   H     2.879003   -1.522733    0.440785
   H    -1.345827   -1.960213   -0.653554
   H    -0.843344   -4.284943   -1.520809
   H     1.476408   -5.084796   -1.610321
   H     3.327410   -3.728431   -0.659334
   N    -0.596250    0.258896   -0.261779
   N     0.595352   -0.253676    0.270442
          24
Simulation Time: t =  546.00
   C     0.047059    3.601551    1.210835
   C    -1.270729    4.100080    1.159113
   C    -2.309318    3.367047    0.528886
   C    -2.048625    2.154098   -0.100256
   C    -0.737255    1.560722    0.079676
   C     0.318902    2.311363    0.742150
   C     2.045688   -2.149241    0.105953
   C     0.737335   -1.558108   -0.076530
   C    -0.315467   -2.304528   -0.749915
   C    -0.044597   -3.610006   -1.208591
   C     1.266557   -4.103811   -1.163799
   C     2.310197   -3.373668   -0.535806
   H     0.836998    4.279912    1.530856
   H    -1.474134    5.075252    1.631822
   H    -3.319541    3.726896    0.644094
   H    -2.866125    1.533414   -0.464558
   H     1.334545    1.944924    0.696821
   H     2.876959   -1.531857    0.456946
   H    -1.341341   -1.948434   -0.683909
   H    -0.840852   -4.273668   -1.553056
   H     1.481808   -5.079587   -1.628729
   H     3.329151   -3.731697   -0.644461
   N    -0.592161    0.263967   -0.267122
   N     0.591120   -0.259759    0.275242
          24
Simulation Time: t =  548.00
   C     0.043628    3.593854    1.231540
   C    -1.272823    4.092867    1.161859
   C    -2.306277    3.370501    0.517261
   C    -2.046283    2.156151   -0.113548
   C    -0.735390    1.563438    0.078579
   C     0.317139    2.304027    0.758992
   C     2.044138   -2.153531    0.120062
   C     0.735532   -1.559898   -0.074946
   C    -0.313159   -2.298168   -0.768804
   C    -0.042243   -3.600911   -1.229571
   C     1.268297   -4.096304   -1.166770
   C     2.307349   -3.375518   -0.522117
   H     0.842947    4.267186    1.575229
   H    -1.480360    5.070730    1.648768
   H    -3.326898    3.735207    0.617813
   H    -2.867687    1.539893   -0.492117
   H     1.331776    1.929308    0.734448
   H     2.875102   -1.540530    0.475887
   H    -1.339602   -1.934319   -0.716031
   H    -0.840357   -4.261422   -1.588304
   H     1.487796   -5.073268   -1.645778
   H     3.335214   -3.737375   -0.627069
   N    -0.587522    0.269063   -0.272004
   N     0.586310   -0.265740    0.279636
          24
Simulation Time: t =  550.00
   C     0.040026    3.585737    1.251695
   C    -1.274811    4.085990    1.164833
   C    -2.302908    3.373756    0.505808
   C    -2.043116    2.158226   -0.126043
   C    -0.734130    1.567161    0.077957
   C     0.314452    2.297401    0.775325
   C     2.042030   -2.158362    0.133143
   C     0.734245   -1.562255   -0.073769
   C    -0.310246   -2.292619   -0.787182
   C    -0.039986   -3.591005   -1.250038
   C     1.270416   -4.089122   -1.169804
   C     2.304154   -3.376866   -0.508422
   H     0.848679    4.251727    1.622229
   H    -1.487540    5.062546    1.662415
   H    -3.337672    3.745660    0.588745
   H    -2.869299    1.546545   -0.522004
   H     1.333616    1.910751    0.773431
   H     2.873488   -1.548545    0.497851
   H    -1.339648   -1.918239   -0.749891
   H    -0.840578   -4.247524   -1.626114
   H     1.494074   -5.063838   -1.660218
   H     3.342481   -3.744522   -0.606966
   N    -0.582367    0.273883   -0.276549
   N     0.580993   -0.271813    0.283596
          24
Simulation Time: t =  552.00
   C     0.036614    3.577175    1.271384
   C    -1.276849    4.079617    1.168114
   C    -2.299606    3.376801    0.494445
   C    -2.039448    2.160480   -0.137758
   C    -0.733215    1.571534    0.077769
   C     0.311059    2.291491    0.791168
   C     2.039323   -2.163555    0.145324
   C     0.733285   -1.565480   -0.073193
   C    -0.306734   -2.287527   -0.804845
   C    -0.037897   -3.580543   -1.270097
   C     1.273019   -4.082376   -1.172946
   C     2.300842   -3.378023   -0.494903
   H     0.851246    4.231887    1.670466
   H    -1.495462    5.049692    1.672154
   H    -3.347095    3.756934    0.556845
   H    -2.868918    1.554503   -0.553251
   H     1.337142    1.890233    0.813613
   H     2.871586   -1.556129    0.522527
   H    -1.339583   -1.900827   -0.785588
   H    -0.839972   -4.231132   -1.665791
   H     1.500555   -5.050365   -1.671450
   H     3.347466   -3.752089   -0.583897
   N    -0.576774    0.278562   -0.280724
   N     0.575216   -0.277690    0.287225
          24
Simulation Time: t =  554.00
   C     0.033547    3.568222    1.290691
   C    -1.278956    4.073785    1.171737
   C    -2.296722    3.379616    0.483105
   C    -2.035438    2.163012   -0.148742
   C    -0.732500    1.576265    0.077978
   C     0.307244    2.286182    0.806565
   C     2.035996   -2.168861    0.156747
   C     0.732564   -1.569708   -0.073349
   C    -0.302762   -2.282595   -0.821677
   C    -0.035950   -3.569789   -1.289839
   C     1.276071   -4.076074   -1.176213
   C     2.297646   -3.379254   -0.481716
   H     0.848710    4.206934    1.718758
   H    -1.504072    5.032870    1.678056
   H    -3.351098    3.767869    0.522353
   H    -2.864851    1.564591   -0.584967
   H     1.338514    1.869102    0.854677
   H     2.868362   -1.563917    0.549490
   H    -1.337199   -1.882894   -0.823023
   H    -0.837249   -4.211571   -1.706712
   H     1.507284   -5.033370   -1.679433
   H     3.347494   -3.759244   -0.557733
   N    -0.570852    0.283183   -0.284545
   N     0.569074   -0.283176    0.290638
          24
Simulation Time: t =  556.00
   C     0.030702    3.558978    1.309683
   C    -1.281086    4.068426    1.175663
   C    -2.294353    3.382339    0.471785
   C    -2.031057    2.165743   -0.159076
   C    -0.731938    1.581500    0.078696
   C     0.303228    2.281253    0.821491
   C     2.032098   -2.174103    0.167508
   C     0.732046   -1.574510   -0.074056
   C    -0.298585   -2.277790   -0.837734
   C    -0.033996   -3.558885   -1.309328
   C     1.279268   -4.070075   -1.179637
   C     2.294794   -3.380661   -0.468835
   H     0.840393    4.177129    1.766587
   H    -1.513502    5.014012    1.681178
   H    -3.347476    3.777750    0.485816
   H    -2.856086    1.577092   -0.616490
   H     1.334425    1.848718    0.896045
   H     2.862720   -1.572607    0.578218
   H    -1.330792   -1.865109   -0.861852
   H    -0.831668   -4.188690   -1.748494
   H     1.514609   -5.014623   -1.684922
   H     3.341464   -3.765651   -0.528602
   N    -0.564710    0.287444   -0.288170
   N     0.562736   -0.288480    0.293802
          24
Simulation Time: t =  558.00
   C     0.027914    3.549476    1.328397
   C    -1.283078    4.063341    1.179815
   C    -2.292486    3.384945    0.460427
   C    -2.026322    2.168678   -0.168808
   C    -0.731487    1.586935    0.079867
   C     0.299149    2.276668    0.836019
   C     2.027535   -2.178962    0.177752
   C     0.731762   -1.579820   -0.075325
   C    -0.294286   -2.272926   -0.853007
   C    -0.031719   -3.548095   -1.328593
   C     1.282316   -4.064164   -1.183182
   C     2.292273   -3.382435   -0.456372
   H     0.826773    4.143644    1.813996
   H    -1.524002    4.996151    1.683059
   H    -3.336178    3.786514    0.447868
   H    -2.842406    1.591889   -0.647671
   H     1.323214    1.829849    0.937051
   H     2.853748   -1.582778    0.608307
   H    -1.319670   -1.847748   -0.901618
   H    -0.823184   -4.162894   -1.791111
   H     1.522911   -4.996776   -1.689103
   H     3.330099   -3.771551   -0.496749
   N    -0.558463    0.291377   -0.291658
   N     0.556302   -0.293513    0.296827
          24
Simulation Time: t =  560.00
   C     0.024927    3.539705    1.346832
   C    -1.284801    4.058258    1.184085
   C    -2.290880    3.387385    0.448986
   C    -2.021288    2.171876   -0.177979
   C    -0.731002    1.592059    0.081324
   C     0.295044    2.272420    0.850230
   C     2.022245   -2.183218    0.187605
   C     0.731633   -1.585677   -0.077236
   C    -0.289814   -2.267804   -0.867418
   C    -0.028823   -3.537608   -1.347670
   C     1.285064   -4.058142   -1.186765
   C     2.289868   -3.384738   -0.444427
   H     0.809354    4.108384    1.861631
   H    -1.535880    4.982215    1.685411
   H    -3.319164    3.794826    0.408999
   H    -2.824508    1.608313   -0.678645
   H     1.304885    1.812663    0.977124
   H     2.841071   -1.594557    0.639393
   H    -1.304179   -1.830676   -0.941913
   H    -0.812333   -4.135135   -1.834801
   H     1.532640   -4.982421   -1.693429
   H     3.315645   -3.777835   -0.462530
   N    -0.552304    0.295240   -0.294980
   N     0.549899   -0.298089    0.299854
          24
Simulation Time: t =  562.00
   C     0.021392    3.529727    1.364980
   C    -1.286266    4.052996    1.188357
   C    -2.289165    3.389698    0.437547
   C    -2.015811    2.175362   -0.186611
   C    -0.730357    1.596806    0.083116
   C     0.290758    2.268320    0.864039
   C     2.016309   -2.186927    0.197154
   C     0.731458   -1.591667   -0.079725
   C    -0.285119   -2.262412   -0.881002
   C    -0.025122   -3.527461   -1.366559
   C     1.287471   -4.051885   -1.190321
   C     2.287295   -3.387532   -0.433016
   H     0.790335    4.073606    1.910536
   H    -1.549146    4.974163    1.689305
   H    -3.299596    3.803947    0.369696
   H    -2.803817    1.625206   -0.710097
   H     1.280888    1.796680    1.016083
   H     2.824913   -1.607653    0.671432
   H    -1.285476   -1.813424   -0.982418
   H    -0.800015   -4.106638   -1.879943
   H     1.543979   -4.973210   -1.698827
   H     3.301185   -3.785709   -0.426504
   N    -0.546371    0.298999   -0.298243
   N     0.543699   -0.302370    0.302923
          24
Simulation Time: t =  564.00
   C     0.017034    3.519590    1.382832
   C    -1.287582    4.047558    1.192601
   C    -2.286973    3.391861    0.426149
   C    -2.009775    2.179252   -0.194677
   C    -0.729457    1.601057    0.085254
   C     0.286159    2.264248    0.877395
   C     2.009790   -2.190235    0.206412
   C     0.731003   -1.597349   -0.082669
   C    -0.280133   -2.256727   -0.893790
   C    -0.020463   -3.517683   -1.385265
   C     1.289594   -4.045404   -1.193848
   C     2.284301   -3.390749   -0.422127
   H     0.771756    4.041259    1.961698
   H    -1.563395    4.971978    1.694895
   H    -3.281051    3.815444    0.330216
   H    -2.782155    1.641223   -0.742811
   H     1.253801    1.780923    1.053959
   H     2.806019   -1.621376    0.704523
   H    -1.265145   -1.795400   -1.022833
   H    -0.787052   -4.078534   -1.926849
   H     1.556656   -4.969138   -1.705375
   H     3.289405   -3.796500   -0.389077
   N    -0.540773    0.302649   -0.301550
   N     0.537860   -0.306566    0.306033
          24
Simulation Time: t =  566.00
   C     0.011756    3.509355    1.400434
   C    -1.288978    4.042077    1.196812
   C    -2.284025    3.393888    0.414865
   C    -2.003206    2.183663   -0.202205
   C    -0.728107    1.604525    0.087672
   C     0.281082    2.260121    0.890253
   C     2.002705   -2.193303    0.215381
   C     0.730158   -1.602498   -0.086021
   C    -0.274796   -2.250743   -0.905817
   C    -0.014752   -3.508326   -1.403816
   C     1.291494   -4.038908   -1.197464
   C     2.280765   -3.394288   -0.411717
   H     0.754537    4.012301    2.015427
   H    -1.577710    4.973789    1.701354
   H    -3.266257    3.830565    0.290838
   H    -2.760794    1.655499   -0.777476
   H     1.226772    1.764085    1.091067
   H     2.785249   -1.635095    0.738954
   H    -1.244755   -1.775911   -1.063134
   H    -0.773675   -4.051509   -1.975493
   H     1.569906   -4.968555   -1.712201
   H     3.281635   -3.810995   -0.350633
   N    -0.535651    0.306385   -0.304903
   N     0.532506   -0.310734    0.309268
          24
Simulation Time: t =  568.00
   C     0.005486    3.499259    1.417948
   C    -1.290520    4.036780    1.201112
   C    -2.280260    3.395818    0.403687
   C    -1.996128    2.188595   -0.209274
   C    -0.726299    1.606993    0.090246
   C     0.275465    2.255866    0.902614
   C     1.995109   -2.196259    0.224075
   C     0.728812   -1.606959   -0.089771
   C    -0.269067   -2.244501   -0.917144
   C    -0.008050   -3.499390   -1.422265
   C     1.293331   -4.032693   -1.201295
   C     2.276714   -3.398144   -0.401748
   H     0.738122    3.986580    2.070828
   H    -1.590862    4.976667    1.707281
   H    -3.255985    3.849612    0.251842
   H    -2.740170    1.667809   -0.813995
   H     1.202618    1.745066    1.127671
   H     2.763410   -1.648268    0.774877
   H    -1.225436   -1.754551   -1.103178
   H    -0.759418   -4.025712   -2.025371
   H     1.582725   -4.968941   -1.718021
   H     3.277226   -3.829112   -0.311562
   N    -0.531072    0.310308   -0.308269
   N     0.527695   -0.314847    0.312676
          24
Simulation Time: t =  570.00
   C    -0.001569    3.489437    1.435600
   C    -1.292524    4.031955    1.205541
   C    -2.275765    3.397891    0.392690
   C    -1.988709    2.193959   -0.216090
   C    -0.723903    1.608360    0.092968
   C     0.269301    2.251412    0.914506
   C     1.987061   -2.199237    0.232505
   C     0.726923   -1.610425   -0.093786
   C    -0.262978   -2.238052   -0.927884
   C    -0.000447   -3.490926   -1.440716
   C     1.295253   -4.027054   -1.205479
   C     2.272300   -3.402315   -0.392148
   H     0.720931    3.963113    2.125985
   H    -1.601613    4.977718    1.711364
   H    -3.248778    3.871738    0.213761
   H    -2.719760    1.678670   -0.851586
   H     1.182813    1.723355    1.163930
   H     2.741054   -1.660597    0.812344
   H    -1.207679   -1.731185   -1.142737
   H    -0.743434   -4.000847   -2.075539
   H     1.593933   -4.967818   -1.721591
   H     3.273903   -3.849896   -0.272350
   N    -0.527095    0.314409   -0.311684
   N     0.523477   -0.319005    0.316270
          24
Simulation Time: t =  572.00
   C    -0.009384    3.480206    1.453663
   C    -1.295007    4.027799    1.210200
   C    -2.270771    3.400411    0.381886
   C    -1.980992    2.199468   -0.222888
   C    -0.721047    1.608735    0.095812
   C     0.262754    2.246570    0.925966
   C     1.978673   -2.202364    0.240715
   C     0.724400   -1.612664   -0.097958
   C    -0.256618   -2.231483   -0.938232
   C     0.007881   -3.482884   -1.459259
   C     1.297456   -4.022176   -1.210047
   C     2.267711   -3.406890   -0.382837
   H     0.701107    3.940715    2.178547
   H    -1.609038    4.975003    1.712827
   H    -3.241742    3.895163    0.177318
   H    -2.698483    1.689054   -0.888784
   H     1.167007    1.699445    1.199568
   H     2.718409   -1.672080    0.851092
   H    -1.190934   -1.706224   -1.181439
   H    -0.724861   -3.976561   -2.124805
   H     1.602734   -4.963624   -1.722349
   H     3.268746   -3.871800   -0.233688
   N    -0.523646    0.318483   -0.315177
   N     0.519819   -0.323189    0.320013
          24
Simulation Time: t =  574.00
   C    -0.017813    3.471669    1.472358
   C    -1.298128    4.024373    1.215031
   C    -2.265480    3.403776    0.371370
   C    -1.973109    2.204853   -0.229963
   C    -0.717698    1.608148    0.098781
   C     0.256035    2.241179    0.937092
   C     1.970088   -2.205735    0.248783
   C     0.721310   -1.613507   -0.102177
   C    -0.250144   -2.224853   -0.948416
   C     0.016815   -3.475224   -1.477985
   C     1.300012   -4.018165   -1.215018
   C     2.263096   -3.411861   -0.373679
   H     0.677195    3.918475    2.226390
   H    -1.612824    4.968121    1.711640
   H    -3.231835    3.917854    0.143327
   H    -2.675240    1.700070   -0.923987
   H     1.153437    1.674711    1.233847
   H     2.695090   -1.683162    0.890251
   H    -1.174239   -1.680534   -1.218528
   H    -0.703010   -3.952559   -2.172068
   H     1.608746   -4.956136   -1.720478
   H     3.259271   -3.893315   -0.196314
   N    -0.520668    0.322382   -0.318729
   N     0.516641   -0.327344    0.323872
          24
Simulation Time: t =  576.00
   C    -0.026839    3.463869    1.491772
   C    -1.301733    4.021610    1.220048
   C    -2.260129    3.408101    0.361040
   C    -1.965138    2.209989   -0.237510
   C    -0.714035    1.606551    0.101731
   C     0.249501    2.235181    0.948153
   C     1.961343   -2.209314    0.256811
   C     0.717791   -1.613021   -0.106342
   C    -0.243753   -2.218199   -0.958663
   C     0.026302   -3.467839   -1.496919
   C     1.302985   -4.014962   -1.220295
   C     2.258502   -3.417305   -0.364647
   H     0.648775    3.896078    2.268280
   H    -1.613388    4.958345    1.708705
   H    -3.216948    3.938141    0.112515
   H    -2.649457    1.712513   -0.955902
   H     1.139715    1.650925    1.265867
   H     2.670499   -1.694567    0.928781
   H    -1.156051   -1.655271   -1.253395
   H    -0.677667   -3.928876   -2.216544
   H     1.612196   -4.946725   -1.716874
   H     3.243994   -3.913299   -0.160934
   N    -0.518087    0.326050   -0.322279
   N     0.513855   -0.331287    0.327815
          24
Simulation Time: t =  578.00
   C    -0.036493    3.456624    1.511852
   C    -1.305869    4.019263    1.225044
   C    -2.254734    3.413581    0.350976
   C    -1.957061    2.214790   -0.245650
   C    -0.710109    1.604053    0.104582
   C     0.243410    2.228506    0.959366
   C     1.952520   -2.213221    0.264821
   C     0.714084   -1.611281   -0.110331
   C    -0.237720   -2.211610   -0.969286
   C     0.036349   -3.460541   -1.516014
   C     1.306298   -4.012447   -1.225812
   C     2.253968   -3.423069   -0.355533
   H     0.616696    3.873909    2.304267
   H    -1.611766    4.948443    1.705485
   H    -3.196398    3.955241    0.085281
   H    -2.621396    1.726587   -0.984035
   H     1.123846    1.629923    1.294682
   H     2.644062   -1.706898    0.965465
   H    -1.135213   -1.631781   -1.285280
   H    -0.649252   -3.905836   -2.258067
   H     1.613821   -4.937800   -1.713100
   H     3.222589   -3.931362   -0.128132
   N    -0.515843    0.329397   -0.325727
   N     0.511359   -0.334850    0.331824
          24
Simulation Time: t =  580.00
   C    -0.046915    3.449708    1.532371
   C    -1.310294    4.017092    1.229987
   C    -2.249310    3.420028    0.341026
   C    -1.948751    2.219373   -0.254294
   C    -0.706226    1.600821    0.107205
   C     0.237995    2.221248    0.971045
   C     1.943608   -2.217521    0.272822
   C     0.710462   -1.608361   -0.113970
   C    -0.232280   -2.205171   -0.980592
   C     0.047027   -3.453118   -1.535133
   C     1.309856   -4.010397   -1.231444
   C     2.249426   -3.429009   -0.346242
   H     0.582865    3.852984    2.335666
   H    -1.609343    4.941781    1.703729
   H    -3.171145    3.969389    0.061535
   H    -2.592185    1.741878   -1.008793
   H     1.104823    1.612849    1.319884
   H     2.615540   -1.720647    0.999436
   H    -1.111151   -1.611087   -1.313824
   H    -0.618716   -3.884028   -2.296959
   H     1.614623   -4.932305   -1.710766
   H     3.196185   -3.947832   -0.098124
   N    -0.513828    0.332322   -0.329067
   N     0.509058   -0.337999    0.335847
          24
Simulation Time: t =  582.00
   C    -0.058256    3.442754    1.553038
   C    -1.314992    4.014901    1.234730
   C    -2.243624    3.427327    0.331257
   C    -1.940078    2.223848   -0.263326
   C    -0.702516    1.597230    0.109682
   C     0.233264    2.213538    0.983274
   C     1.934580   -2.222319    0.280778
   C     0.707190   -1.604328   -0.117043
   C    -0.227535   -2.199016   -0.992823
   C     0.058418   -3.445365   -1.554151
   C     1.313498   -4.008618   -1.237136
   C     2.244734   -3.434884   -0.336633
   H     0.549669    3.834591    2.364795
   H    -1.607320    4.941032    1.704692
   H    -3.143728    3.981758    0.040653
   H    -2.563397    1.757592   -1.031286
   H     1.083235    1.599875    1.341540
   H     2.585195   -1.735944    1.030164
   H    -1.084693   -1.593490   -1.339097
   H    -0.587183   -3.864071   -2.333865
   H     1.615510   -4.932332   -1.711137
   H     3.167130   -3.963710   -0.070679
   N    -0.511895    0.334572   -0.332302
   N     0.506842   -0.340736    0.339766
          24
Simulation Time: t =  584.00
   C    -0.070745    3.435529    1.573507
   C    -1.319672    4.012625    1.239388
   C    -2.237448    3.435143    0.321605
   C    -1.930807    2.228334   -0.272541
   C    -0.699292    1.593526    0.111923
   C     0.229065    2.205646    0.996196
   C     1.925410   -2.227719    0.288684
   C     0.704407   -1.599359   -0.119533
   C    -0.223343   -2.193301   -1.006103
   C     0.070483   -3.437056   -1.572948
   C     1.317265   -4.007058   -1.242807
   C     2.239598   -3.440498   -0.326745
   H     0.519301    3.819991    2.394041
   H    -1.606371    4.946908    1.708627
   H    -3.117650    3.994155    0.021517
   H    -2.536745    1.772791   -1.052953
   H     1.061066    1.590070    1.360456
   H     2.553820   -1.752629    1.057768
   H    -1.057860   -1.578452   -1.361757
   H    -0.555775   -3.846538   -2.369472
   H     1.616830   -4.938357   -1.714434
   H     3.138777   -3.980373   -0.045066
   N    -0.509954    0.336056   -0.335425
   N     0.504629   -0.343022    0.343553
          24
Simulation Time: t =  586.00
   C    -0.084328    3.427619    1.593520
   C    -1.324405    4.010452    1.244005
   C    -2.230498    3.443215    0.312134
   C    -1.920901    2.233004   -0.281843
   C    -0.696544    1.589741    0.113890
   C     0.225095    2.198008    1.009905
   C     1.915969   -2.233711    0.296461
   C     0.702132   -1.594019   -0.121595
   C    -0.219352   -2.188020   -1.020234
   C     0.083233   -3.428137   -1.591502
   C     1.321301   -4.005832   -1.248447
   C     2.233645   -3.445787   -0.316703
   H     0.493076    3.809795    2.424981
   H    -1.606295    4.957583    1.714698
   H    -3.096324    4.008277    0.002962
   H    -2.513478    1.786788   -1.075131
   H     1.041285    1.581706    1.377847
   H     2.522720   -1.770104    1.083044
   H    -1.033432   -1.564661   -1.383027
   H    -0.525435   -3.831756   -2.404351
   H     1.618306   -4.948736   -1.719984
   H     3.114258   -3.999187   -0.020354
   N    -0.507973    0.336784   -0.338335
   N     0.502333   -0.344521    0.347209
          24
Simulation Time: t =  588.00
   C    -0.098970    3.418943    1.612964
   C    -1.329038    4.008686    1.248857
   C    -2.222675    3.451209    0.302704
   C    -1.910268    2.237987   -0.291094
   C    -0.694446    1.586077    0.115570
   C     0.220998    2.190910    1.024448
   C     1.906156   -2.240295    0.304063
   C     0.700269   -1.588685   -0.123423
   C    -0.215188   -2.183161   -1.035024
   C     0.096580   -3.418583   -1.609827
   C     1.325851   -4.005152   -1.254031
   C     2.226652   -3.450805   -0.306696
   H     0.471065    3.803777    2.457416
   H    -1.606505    4.969720    1.721344
   H    -3.081613    4.025015   -0.015847
   H    -2.494186    1.799256   -1.098285
   H     1.026806    1.572955    1.395025
   H     2.493261   -1.787707    1.107223
   H    -1.013960   -1.550826   -1.404145
   H    -0.496680   -3.819656   -2.438675
   H     1.619235   -4.960606   -1.726386
   H     3.095272   -4.020644    0.004133
   N    -0.505900    0.336699   -0.341033
   N     0.499911   -0.345062    0.350753
          24
Simulation Time: t =  590.00
   C    -0.114416    3.409435    1.631981
   C    -1.333800    4.007653    1.253990
   C    -2.213938    3.459159    0.293363
   C    -1.898974    2.243301   -0.300323
   C    -0.692869    1.582957    0.117253
   C     0.216410    2.184428    1.039615
   C     1.895919   -2.247459    0.311468
   C     0.698772   -1.583486   -0.125011
   C    -0.210649   -2.178699   -1.050387
   C     0.110432   -3.408441   -1.627992
   C     1.330959   -4.005223   -1.259661
   C     2.218699   -3.455644   -0.296728
   H     0.452139    3.800772    2.489513
   H    -1.606321    4.979836    1.726912
   H    -3.073119    4.043774   -0.034933
   H    -2.478463    1.810512   -1.121838
   H     1.019304    1.562735    1.412915
   H     2.466470   -1.804925    1.131226
   H    -1.000869   -1.536278   -1.425991
   H    -0.469524   -3.809773   -2.471876
   H     1.619010   -4.970792   -1.732208
   H     3.081254   -4.043960    0.028501
   N    -0.503693    0.335590   -0.343599
   N     0.497372   -0.344727    0.354097
          24
Simulation Time: t =  592.00
   C    -0.130359    3.399199    1.650787
   C    -1.338703    4.007583    1.259549
   C    -2.204524    3.466992    0.283894
   C    -1.887222    2.249065   -0.309586
   C    -0.691764    1.580490    0.118989
   C     0.211220    2.178520    1.055384
   C     1.885140   -2.254962    0.318777
   C     0.697672   -1.578727   -0.126450
   C    -0.205641   -2.174441   -1.066201
   C     0.124757   -3.397871   -1.646155
   C     1.336562   -4.006121   -1.265397
   C     2.210045   -3.460649   -0.286860
   H     0.434593    3.799207    2.518602
   H    -1.605428    4.985491    1.730296
   H    -3.068378    4.062792   -0.053620
   H    -2.465224    1.821275   -1.144315
   H     1.018488    1.551335    1.431617
   H     2.442732   -1.821832    1.155155
   H    -0.993899   -1.521568   -1.448688
   H    -0.443501   -3.801315   -2.502688
   H     1.617357   -4.977144   -1.736316
   H     3.069956   -4.067117    0.052235
   N    -0.501347    0.333502   -0.346004
   N     0.494708   -0.343523    0.357214
          24
Simulation Time: t =  594.00
   C    -0.146392    3.388175    1.669612
   C    -1.343937    4.008524    1.265417
   C    -2.194747    3.474811    0.274232
   C    -1.875320    2.255417   -0.319055
   C    -0.690862    1.578452    0.120796
   C     0.205473    2.173082    1.071787
   C     1.873791   -2.262553    0.326118
   C     0.696992   -1.574823   -0.127921
   C    -0.200183   -2.170016   -1.082313
   C     0.139561   -3.387123   -1.664483
   C     1.342505   -4.007808   -1.271294
   C     2.201005   -3.466189   -0.277049
   H     0.416841    3.797517    2.542332
   H    -1.603862    4.986052    1.730978
   H    -3.063992    4.079804   -0.070897
   H    -2.453074    1.832444   -1.164032
   H     1.022317    1.540432    1.450341
   H     2.421874   -1.838769    1.178282
   H    -0.991258   -1.508295   -1.471737
   H    -0.418153   -3.793400   -2.529855
   H     1.614559   -4.978849   -1.738344
   H     3.058398   -4.087656    0.074477
   N    -0.498964    0.330809   -0.348145
   N     0.491941   -0.341445    0.360168
          24
Simulation Time: t =  596.00
   C    -0.162504    3.376645    1.688572
   C    -1.349255    4.010308    1.271666
   C    -2.184939    3.482674    0.264167
   C    -1.863341    2.262336   -0.328742
   C    -0.690219    1.576944    0.122617
   C     0.199369    2.167796    1.088820
   C     1.862005   -2.270124    0.333677
   C     0.696579   -1.571837   -0.129544
   C    -0.194368   -2.165112   -1.098690
   C     0.154723   -3.376300   -1.683094
   C     1.348750   -4.010079   -1.277223
   C     2.191834   -3.472557   -0.267304
   H     0.398042    3.794632    2.559366
   H    -1.602263    4.982501    1.729553
   H    -3.056928    4.092918   -0.085967
   H    -2.440951    1.844578   -1.179587
   H     1.027648    1.532195    1.468058
   H     2.403345   -1.856297    1.199629
   H    -0.990506   -1.498632   -1.494093
   H    -0.393289   -3.785319   -2.552736
   H     1.611354   -4.976795   -1.738632
   H     3.044243   -4.103475    0.094450
   N    -0.496561    0.327660   -0.350000
   N     0.489110   -0.338721    0.362923
          24
Simulation Time: t =  598.00
   C    -0.178632    3.364702    1.707677
   C    -1.354644    4.012650    1.278098
   C    -2.175257    3.490743    0.253748
   C    -1.851346    2.269778   -0.338657
   C    -0.689741    1.576062    0.124634
   C     0.193005    2.162387    1.106356
   C     1.849974   -2.277712    0.341584
   C     0.696266   -1.569559   -0.131288
   C    -0.188287   -2.159479   -1.115343
   C     0.170196   -3.365495   -1.702002
   C     1.355160   -4.012618   -1.283040
   C     2.182694   -3.479852   -0.257577
   H     0.378172    3.790020    2.569939
   H    -1.601448    4.977351    1.727185
   H    -3.045436    4.101080   -0.098492
   H    -2.428267    1.857894   -1.190500
   H     1.031673    1.528504    1.483836
   H     2.386498   -1.874745    1.218294
   H    -0.989546   -1.494288   -1.514784
   H    -0.369214   -3.776748   -2.571603
   H     1.608769   -4.973213   -1.738202
   H     3.026393   -4.113586    0.111798
   N    -0.494227    0.324250   -0.351675
   N     0.486350   -0.335802    0.365409
          24
Simulation Time: t =  600.00
   C    -0.194847    3.352527    1.726824
   C    -1.359871    4.015131    1.284595
   C    -2.165742    3.498924    0.242925
   C    -1.839385    2.277830   -0.348708
   C    -0.689394    1.575576    0.126756
   C     0.186444    2.156677    1.124372
   C     1.837747   -2.285252    0.349891
   C     0.695911   -1.568111   -0.133277
   C    -0.181922   -2.152929   -1.132124
   C     0.186096   -3.354815   -1.721119
   C     1.361609   -4.015057   -1.288591
   C     2.173540   -3.488156   -0.247989
   H     0.358076    3.783888    2.575697
   H    -1.602460    4.973798    1.725541
   H    -3.029533    4.104381   -0.108780
   H    -2.415098    1.872107   -1.197277
   H     1.032704    1.530357    1.497132
   H     2.370896   -1.894095    1.233758
   H    -0.987010   -1.496025   -1.533352
   H    -0.346617   -3.767803   -2.587551
   H     1.607877   -4.970922   -1.738337
   H     3.005379   -4.118361    0.126888
   N    -0.492048    0.320975   -0.353107
   N     0.483732   -0.332804    0.367656
          24
Simulation Time: t =  602.00
   C    -0.211150    3.340153    1.745867
   C    -1.365049    4.017369    1.290764
   C    -2.156154    3.507246    0.232024
   C    -1.827491    2.286534   -0.358840
   C    -0.688884    1.575277    0.129070
   C     0.179484    2.150544    1.142617
   C     1.825361   -2.292781    0.358531
   C     0.695478   -1.567528   -0.135572
   C    -0.175182   -2.145510   -1.148912
   C     0.202550   -3.344307   -1.740284
   C     1.367895   -4.017101   -1.293842
   C     2.164235   -3.497302   -0.238596
   H     0.339209    3.776946    2.579432
   H    -1.606020    4.974518    1.726086
   H    -3.011022    4.104062   -0.117784
   H    -2.401999    1.886579   -1.201433
   H     1.030525    1.537498    1.508129
   H     2.356321   -1.913976    1.246171
   H    -0.982786   -1.503284   -1.549939
   H    -0.326357   -3.758910   -2.602069
   H     1.609432   -4.972378   -1.740093
   H     2.983246   -4.119519    0.140749
   N    -0.490154    0.318240   -0.354240
   N     0.481324   -0.329866    0.369734
          24
Simulation Time: t =  604.00
   C    -0.227743    3.327795    1.764633
   C    -1.370066    4.019111    1.296516
   C    -2.146223    3.515555    0.221212
   C    -1.815582    2.295928   -0.368848
   C    -0.688153    1.575071    0.131587
   C     0.171899    2.143933    1.160824
   C     1.812821   -2.300379    0.367421
   C     0.694881   -1.567636   -0.138117
   C    -0.167826   -2.137462   -1.165619
   C     0.219625   -3.333941   -1.759302
   C     1.373913   -4.018590   -1.298779
   C     2.154542   -3.507039   -0.229539
   H     0.323302    3.770291    2.584259
   H    -1.612377    4.980567    1.729554
   H    -2.992839    4.102350   -0.126986
   H    -2.390007    1.900358   -1.204991
   H     1.026300    1.548592    1.517560
   H     2.342827   -1.933741    1.256155
   H    -0.978034   -1.514374   -1.565206
   H    -0.309140   -3.750509   -2.616716
   H     1.613660   -4.978432   -1.743873
   H     2.962933   -4.119632    0.154895
   N    -0.488646    0.316297   -0.355087
   N     0.479245   -0.327274    0.371632
          24
Simulation Time: t =  606.00
   C    -0.244652    3.315503    1.782960
   C    -1.375129    4.020375    1.301703
   C    -2.135629    3.523787    0.210858
   C    -1.803588    2.305998   -0.378587
   C    -0.687035    1.575021    0.134487
   C     0.163368    2.136896    1.178624
   C     1.800136   -2.308185    0.376412
   C     0.694059   -1.568197   -0.140751
   C    -0.159601   -2.129085   -1.182178
   C     0.237365   -3.323739   -1.778033
   C     1.379538   -4.019530   -1.303524
   C     2.144250   -3.517038   -0.220861
   H     0.311600    3.764757    2.592777
   H    -1.620987    4.990724    1.735516
   H    -2.978135    4.101781   -0.137968
   H    -2.379903    1.912574   -1.209969
   H     1.021969    1.561458    1.526773
   H     2.330621   -1.952600    1.264768
   H    -0.974569   -1.527056   -1.580132
   H    -0.295259   -3.742860   -2.632390
   H     1.620301   -4.987919   -1.749257
   H     2.947304   -4.121241    0.170778
   N    -0.487560    0.315213   -0.355685
   N     0.477573   -0.325305    0.373253
          24
Simulation Time: t =  608.00
   C    -0.262014    3.303557    1.800771
   C    -1.380133    4.021273    1.306506
   C    -2.124279    3.531821    0.201061
   C    -1.791362    2.316631   -0.387889
   C    -0.685631    1.575090    0.137621
   C     0.153698    2.129544    1.195843
   C     1.787342   -2.316351    0.385377
   C     0.692933   -1.569023   -0.143494
   C    -0.150217   -2.120682   -1.198484
   C     0.255631   -3.313654   -1.796446
   C     1.384821   -4.020141   -1.308183
   C     2.133256   -3.527066   -0.212568
   H     0.304255    3.760476    2.606002
   H    -1.630972    5.002036    1.742842
   H    -2.968752    4.104245   -0.151850
   H    -2.372031    1.922723   -1.217548
   H     1.019786    1.573942    1.536905
   H     2.319916   -1.969807    1.273037
   H    -0.974346   -1.539140   -1.595528
   H    -0.284326   -3.735769   -2.649188
   H     1.628585   -4.998274   -1.755140
   H     2.937851   -4.125841    0.189116
   N    -0.486959    0.315124   -0.356026
   N     0.476360   -0.324162    0.374609
          24
Simulation Time: t =  610.00
   C    -0.279611    3.292027    1.818127
   C    -1.385234    4.022039    1.310975
   C    -2.112280    3.539726    0.191926
   C    -1.778945    2.327717   -0.396741
   C    -0.683894    1.575136    0.140952
   C     0.142754    2.122079    1.212363
   C     1.774453   -2.324940    0.394206
   C     0.691456   -1.570085   -0.146372
   C    -0.139501   -2.112389   -1.214421
   C     0.274286   -3.303782   -1.814601
   C     1.389825   -4.020660   -1.312874
   C     2.121605   -3.537076   -0.204598
   H     0.299943    3.756526    2.623190
   H    -1.641193    5.011138    1.750051
   H    -2.964402    4.110217   -0.168797
   H    -2.365814    1.931005   -1.227791
   H     1.021136    1.584359    1.548808
   H     2.310722   -1.984854    1.281700
   H    -0.978156   -1.549194   -1.611842
   H    -0.275385   -3.728700   -2.666358
   H     1.637724   -5.006481   -1.760403
   H     2.933913   -4.133338    0.209494
   N    -0.486827    0.316165   -0.356066
   N     0.475589   -0.323888    0.375698
          24
Simulation Time: t =  612.00
   C    -0.297352    3.281206    1.835185
   C    -1.390265    4.022847    1.315396
   C    -2.099984    3.547552    0.183252
   C    -1.766356    2.339056   -0.405198
   C    -0.682030    1.575118    0.144264
   C     0.130676    2.114585    1.228250
   C     1.761539   -2.334002    0.402857
   C     0.689569   -1.571260   -0.149433
   C    -0.127436   -2.104262   -1.229962
   C     0.293083   -3.294134   -1.832598
   C     1.394687   -4.021317   -1.317627
   C     2.109527   -3.547148   -0.196824
   H     0.296429    3.751342    2.642263
   H    -1.650828    5.015288    1.755992
   H    -2.962693    4.118694   -0.187914
   H    -2.359934    1.938205   -1.239428
   H     1.025849    1.592278    1.562452
   H     2.302708   -1.997511    1.290909
   H    -0.985265   -1.557052   -1.628560
   H    -0.267103   -3.720933   -2.682850
   H     1.647058   -5.010247   -1.764208
   H     2.932909   -4.142319    0.230447
   N    -0.487141    0.318410   -0.355787
   N     0.475219   -0.324594    0.376527
          24
Simulation Time: t =  614.00
   C    -0.314996    3.271276    1.852101
   C    -1.395291    4.023751    1.319775
   C    -2.087752    3.555666    0.175036
   C    -1.753611    2.350294   -0.413394
   C    -0.680152    1.575200    0.147602
   C     0.117646    2.107014    1.243510
   C     1.748762   -2.343670    0.411334
   C     0.687253   -1.572266   -0.152577
   C    -0.114257   -2.096358   -1.245282
   C     0.311769   -3.284670   -1.850519
   C     1.399469   -4.022247   -1.322474
   C     2.097362   -3.557287   -0.188985
   H     0.291258    3.743313    2.660888
   H    -1.659512    5.013261    1.760172
   H    -2.960167    4.127947   -0.207752
   H    -2.352756    1.945420   -1.250769
   H     1.031886    1.598176    1.577300
   H     2.295132   -2.007913    1.300312
   H    -0.993349   -1.563497   -1.644569
   H    -0.258180   -3.711836   -2.697779
   H     1.656161   -5.008680   -1.766253
   H     2.931409   -4.150920    0.250122
   N    -0.487799    0.321756   -0.355237
   N     0.475213   -0.326443    0.377021
          24
Simulation Time: t =  616.00
   C    -0.332437    3.262423    1.868997
   C    -1.400158    4.024732    1.324266
   C    -2.075955    3.564181    0.167044
   C    -1.740736    2.361217   -0.421444
   C    -0.678473    1.575509    0.150875
   C     0.104012    2.099324    1.258302
   C     1.736135   -2.353888    0.419593
   C     0.684618   -1.573082   -0.155682
   C    -0.100275   -2.088649   -1.260509
   C     0.330227   -3.275398   -1.868350
   C     1.404182   -4.023386   -1.327402
   C     2.085405   -3.567564   -0.180906
   H     0.282501    3.731350    2.677387
   H    -1.667256    5.005524    1.762843
   H    -2.953808    4.136293   -0.226706
   H    -2.342921    1.953624   -1.260230
   H     1.036496    1.603094    1.592295
   H     2.287225   -2.016343    1.309159
   H    -0.999373   -1.569570   -1.658591
   H    -0.247668   -3.701076   -2.710798
   H     1.665038   -5.002457   -1.766990
   H     2.926297   -4.157706    0.266917
   N    -0.488654    0.326012   -0.354408
   N     0.475441   -0.329416    0.377083
          24
Simulation Time: t =  618.00
   C    -0.349485    3.254569    1.885857
   C    -1.404911    4.025610    1.328708
   C    -2.064768    3.573282    0.159272
   C    -1.727805    2.371691   -0.429434
   C    -0.676993    1.576015    0.154100
   C     0.090001    2.091522    1.272785
   C     1.723673   -2.364628    0.427575
   C     0.681843   -1.573756   -0.158636
   C    -0.085833   -2.081184   -1.275848
   C     0.348398   -3.266275   -1.885969
   C     1.408753   -4.024574   -1.332425
   C     2.073890   -3.577910   -0.172404
   H     0.269205    3.715280    2.691256
   H    -1.674694    4.994197    1.765055
   H    -2.941683    4.142896   -0.243717
   H    -2.329675    1.963381   -1.267093
   H     1.036880    1.607969    1.606463
   H     2.278150   -2.023262    1.316777
   H    -1.000537   -1.576019   -1.669713
   H    -0.235151   -3.688747   -2.722279
   H     1.673920   -4.993698   -1.767376
   H     2.915667   -4.162128    0.279931
   N    -0.489605    0.331128   -0.353297
   N     0.475805   -0.333419    0.376713
          24
Simulation Time: t =  620.00
   C    -0.366218    3.247649    1.902556
   C    -1.409395    4.026115    1.333088
   C    -2.054233    3.582859    0.151619
   C    -1.714815    2.381715   -0.437305
   C    -0.675825    1.576729    0.157158
   C     0.075871    2.083671    1.287109
   C     1.711258   -2.375716    0.435197
   C     0.679166   -1.574577   -0.161356
   C    -0.071188   -2.073979   -1.291398
   C     0.366353   -3.257311   -1.903177
   C     1.413092   -4.025550   -1.337525
   C     2.062871   -3.588276   -0.163452
   H     0.251548    3.695858    2.703413
   H    -1.682518    4.982476    1.768144
   H    -2.923521    4.147870   -0.258390
   H    -2.313047    1.974739   -1.271693
   H     1.031177    1.613194    1.619192
   H     2.267402   -2.029021    1.322678
   H    -0.995221   -1.582936   -1.677585
   H    -0.220755   -3.675292   -2.733318
   H     1.683381   -4.985233   -1.768788
   H     2.899327   -4.164779    0.289140
   N    -0.490522    0.336968   -0.351847
   N     0.476163   -0.338159    0.375929
          24
Simulation Time: t =  622.00
   C    -0.382568    3.241348    1.918840
   C    -1.413721    4.026019    1.337169
   C    -2.044224    3.592854    0.144213
   C    -1.701782    2.391359   -0.444945
   C    -0.674902    1.577838    0.160225
   C     0.061665    2.075914    1.301323
   C     1.698824   -2.387030    0.442402
   C     0.676742   -1.575548   -0.163730
   C    -0.056400   -2.067129   -1.307210
   C     0.384136   -3.248481   -1.919803
   C     1.417166   -4.026069   -1.342570
   C     2.052198   -3.598532   -0.154192
   H     0.230677    3.674531    2.715955
   H    -1.691593    4.973652    1.773560
   H    -2.900397    4.152391   -0.271231
   H    -2.293855    1.987238   -1.275348
   H     1.018770    1.618314    1.630581
   H     2.254727   -2.033956    1.326862
   H    -0.983570   -1.589691   -1.682562
   H    -0.204906   -3.661436   -2.745307
   H     1.693927   -4.979664   -1.772556
   H     2.878976   -4.167260    0.295429
   N    -0.491252    0.343210   -0.350108
   N     0.476367   -0.343528    0.374683
          24
Simulation Time: t =  624.00
   C    -0.398744    3.235536    1.934397
   C    -1.417787    4.025173    1.341004
   C    -2.034536    3.603001    0.137120
   C    -1.688543    2.400635   -0.452112
   C    -0.674379    1.579754    0.163382
   C     0.047374    2.068373    1.315389
   C     1.686399   -2.398517    0.449212
   C     0.674593   -1.576587   -0.165730
   C    -0.041384   -2.060758   -1.323217
   C     0.401763   -3.239743   -1.935761
   C     1.421018   -4.026039   -1.347415
   C     2.041558   -3.608472   -0.144870
   H     0.208278    3.653104    2.731606
   H    -1.702302    4.969685    1.782026
   H    -2.874707    4.158375   -0.283403
   H    -2.273289    2.000169   -1.280065
   H     1.000603    1.622225    1.641297
   H     2.240166   -2.038272    1.329652
   H    -0.967415   -1.595080   -1.685632
   H    -0.188038   -3.647864   -2.759645
   H     1.705762   -4.978234   -1.779441
   H     2.857670   -4.171898    0.300430
   N    -0.491623    0.349404   -0.348180
   N     0.476281   -0.349424    0.372926
          24
Simulation Time: t =  626.00
   C    -0.414728    3.229858    1.948976
   C    -1.421687    4.023610    1.344536
   C    -2.024876    3.613066    0.130469
   C    -1.675169    2.409709   -0.458675
   C    -0.674162    1.582321    0.166617
   C     0.032849    2.061385    1.329369
   C     1.673914   -2.409979    0.455622
   C     0.672761   -1.578090   -0.167668
   C    -0.025921   -2.054852   -1.339086
   C     0.419194   -3.231171   -1.951060
   C     1.424834   -4.025562   -1.351909
   C     2.030605   -3.618014   -0.135902
   H     0.185673    3.633075    2.752758
   H    -1.714540    4.970409    1.793355
   H    -2.849485    4.168015   -0.296414
   H    -2.252565    2.012809   -1.287750
   H     0.978993    1.623347    1.652375
   H     2.223923   -2.042245    1.331909
   H    -0.949374   -1.597389   -1.688459
   H    -0.170232   -3.635020   -2.777217
   H     1.718613   -4.980360   -1.789307
   H     2.838672   -4.180996    0.306053
   N    -0.491549    0.355484   -0.346040
   N     0.475753   -0.355399    0.370846
          24
Simulation Time: t =  628.00
   C    -0.430579    3.224179    1.962469
   C    -1.425379    4.021604    1.348041
   C    -2.015035    3.622716    0.124212
   C    -1.661654    2.418693   -0.464527
   C    -0.674357    1.585482    0.169832
   C     0.017934    2.055246    1.343321
   C     1.661347   -2.421242    0.461647
   C     0.671255   -1.580284   -0.169727
   C    -0.009876   -2.049355   -1.354539
   C     0.436404   -3.222910   -1.965768
   C     1.428783   -4.024833   -1.356027
   C     2.019164   -3.627152   -0.127601
   H     0.163254    3.615260    2.780537
   H    -1.727435    4.973643    1.806319
   H    -2.827467    4.183023   -0.311442
   H    -2.232343    2.024730   -1.299689
   H     0.957058    1.620158    1.664845
   H     2.206413   -2.046051    1.334518
   H    -0.932120   -1.595061   -1.692699
   H    -0.151222   -3.622933   -2.798275
   H     1.731697   -4.983906   -1.801185
   H     2.823715   -4.196037    0.313714
   N    -0.490937    0.361281   -0.343738
   N     0.474670   -0.361165    0.368554
          24
Simulation Time: t =  630.00
   C    -0.446223    3.218530    1.974875
   C    -1.429072    4.019564    1.351622
   C    -2.004855    3.631979    0.118515
   C    -1.648007    2.427512   -0.469686
   C    -0.674959    1.589620    0.173309
   C     0.002457    2.049953    1.357117
   C     1.648750   -2.432258    0.467281
   C     0.670084   -1.582963   -0.171791
   C     0.006697   -2.044395   -1.369580
   C     0.453268   -3.214925   -1.979982
   C     1.432937   -4.024062   -1.359876
   C     2.007360   -3.635913   -0.119951
   H     0.140286    3.599602    2.814284
   H    -1.740158    4.976108    1.819449
   H    -2.809570    4.203999   -0.328821
   H    -2.212513    2.035971   -1.316022
   H     0.936965    1.611359    1.679785
   H     2.188059   -2.049950    1.338470
   H    -0.917266   -1.587262   -1.699549
   H    -0.130271   -3.611227   -2.822330
   H     1.744017   -4.986241   -1.813661
   H     2.812398   -4.216786    0.323688
   N    -0.489647    0.366265   -0.341514
   N     0.472980   -0.366773    0.365983
          24
Simulation Time: t =  632.00
   C    -0.461554    3.212945    1.986455
   C    -1.432857    4.017821    1.355480
   C    -1.994446    3.640808    0.113179
   C    -1.634408    2.436301   -0.474249
   C    -0.675881    1.594415    0.176912
   C    -0.013506    2.045520    1.370791
   C     1.636005   -2.442787    0.472506
   C     0.669396   -1.586461   -0.173957
   C     0.023636   -2.039846   -1.384165
   C     0.469812   -3.207414   -1.993744
   C     1.437275   -4.023413   -1.363682
   C     1.995451   -3.644546   -0.112912
   H     0.115227    3.585388    2.851548
   H    -1.751716    4.975105    1.831191
   H    -2.794454    4.229875   -0.347695
   H    -2.192380    2.047005   -1.335660
   H     0.919378    1.596605    1.697576
   H     2.169213   -2.054263    1.344432
   H    -0.904666   -1.574123   -1.709585
   H    -0.106481   -3.599354   -2.848498
   H     1.754787   -4.985126   -1.825415
   H     2.802517   -4.241516    0.335151
   N    -0.487701    0.370516   -0.339357
   N     0.470658   -0.371914    0.363333
          24
Simulation Time: t =  634.00
   C    -0.476295    3.207391    1.997582
   C    -1.436970    4.016595    1.359529
   C    -1.984017    3.649407    0.108121
   C    -1.621173    2.445138   -0.478484
   C    -0.676912    1.599486    0.180676
   C    -0.029742    2.041859    1.384385
   C     1.623018   -2.452622    0.477362
   C     0.669294   -1.591002   -0.176284
   C     0.040692   -2.035468   -1.398292
   C     0.486066   -3.200559   -2.007125
   C     1.441773   -4.022998   -1.367612
   C     1.983722   -3.653333   -0.106418
   H     0.086244    3.571433    2.889035
   H    -1.761585    4.969220    1.840588
   H    -2.779172    4.258386   -0.366478
   H    -2.170716    2.058797   -1.356650
   H     0.902952    1.576510    1.718090
   H     2.150018   -2.059388    1.352671
   H    -0.892560   -1.556749   -1.722641
   H    -0.079177   -3.586903   -2.875691
   H     1.763623   -4.979412   -1.835661
   H     2.791214   -4.267753    0.346757
   N    -0.485156    0.374181   -0.337262
   N     0.467699   -0.376378    0.360750
          24
Simulation Time: t =  636.00
   C    -0.490388    3.202128    2.008627
   C    -1.441426    4.015942    1.363813
   C    -1.973848    3.657979    0.103206
   C    -1.608409    2.453939   -0.482615
   C    -0.678051    1.605039    0.184762
   C    -0.045899    2.038606    1.397802
   C     1.609966   -2.461799    0.482016
   C     0.669643   -1.596144   -0.178708
   C     0.057543   -2.031125   -1.412050
   C     0.502006   -3.194368   -2.020263
   C     1.446423   -4.022786   -1.371631
   C     1.972354   -3.662481   -0.100405
   H     0.051883    3.556583    2.923711
   H    -1.769737    4.958687    1.847412
   H    -2.760645    4.286840   -0.383446
   H    -2.146230    2.072387   -1.376964
   H     0.884909    1.552437    1.740781
   H     2.130387   -2.065826    1.362879
   H    -0.878385   -1.536807   -1.738180
   H    -0.047991   -3.573607   -2.902956
   H     1.770722   -4.969375   -1.844206
   H     2.776041   -4.293094    0.357224
   N    -0.482034    0.377044   -0.335416
   N     0.464173   -0.380421    0.358218
          24
Simulation Time: t =  638.00
   C    -0.503764    3.197199    2.019848
   C    -1.446259    4.015736    1.368174
   C    -1.964099    3.666717    0.098346
   C    -1.596334    2.462759   -0.486844
   C    -0.679136    1.610686    0.189116
   C    -0.061617    2.035537    1.411129
   C     1.597002   -2.470356    0.486667
   C     0.670338   -1.601827   -0.181433
   C     0.073916   -2.026560   -1.425419
   C     0.517603   -3.188883   -2.033313
   C     1.451269   -4.022710   -1.375582
   C     1.961411   -3.672133   -0.094928
   H     0.011634    3.540228    2.953702
   H    -1.776768    4.945257    1.852308
   H    -2.736653    4.313087   -0.397344
   H    -2.118189    2.088415   -1.395134
   H     0.862310    1.526107    1.764883
   H     2.110063   -2.074161    1.374525
   H    -0.859571   -1.515985   -1.755596
   H    -0.012900   -3.559214   -2.929694
   H     1.776666   -4.956690   -1.851539
   H     2.755588   -4.315822    0.365911
   N    -0.478457    0.379362   -0.333841
   N     0.460151   -0.384016    0.355913
          24
Simulation Time: t =  640.00
   C    -0.516589    3.192692    2.031334
   C    -1.451306    4.015739    1.372573
   C    -1.954808    3.675629    0.093421
   C    -1.585060    2.471704   -0.491276
   C    -0.680105    1.615982    0.193523
   C    -0.076569    2.032463    1.424504
   C     1.584243   -2.478359    0.491441
   C     0.671235   -1.608080   -0.184729
   C     0.089661   -2.021531   -1.438300
   C     0.532886   -3.184162   -2.046332
   C     1.456287   -4.022583   -1.379283
   C     1.950915   -3.682347   -0.090077
   H    -0.033917    3.522432    2.978797
   H    -1.783586    4.931812    1.856543
   H    -2.706738    4.335976   -0.407647
   H    -2.086417    2.107061   -1.410703
   H     0.833158    1.499145    1.789689
   H     2.088740   -2.084940    1.387158
   H    -0.834466   -1.495377   -1.774654
   H     0.025634   -3.543687   -2.955987
   H     1.782473   -4.944009   -1.858623
   H     2.729536   -4.335143    0.372801
   N    -0.474545    0.381409   -0.332490
   N     0.455686   -0.387052    0.354005
          24
Simulation Time: t =  642.00
   C    -0.529001    3.188587    2.043009
   C    -1.456522    4.015763    1.376832
   C    -1.945829    3.684743    0.088561
   C    -1.574532    2.480792   -0.495909
   C    -0.680900    1.620866    0.198029
   C    -0.090689    2.029195    1.437913
   C     1.571865   -2.486048    0.496349
   C     0.672207   -1.614495   -0.188471
   C     0.104625   -2.016059   -1.450817
   C     0.547963   -3.180082   -2.059215
   C     1.461347   -4.022150   -1.382679
   C     1.940789   -3.692953   -0.085776
   H    -0.083359    3.503838    3.000344
   H    -1.791443    4.921428    1.861636
   H    -2.672082    4.355666   -0.414862
   H    -2.051503    2.127965   -1.424339
   H     0.796836    1.472509    1.814976
   H     2.066266   -2.098372    1.400461
   H    -0.802601   -1.475474   -1.795411
   H     0.066708   -3.527315   -2.982553
   H     1.789164   -4.934079   -1.866479
   H     2.698707   -4.351447    0.378638
   N    -0.470426    0.383234   -0.331529
   N     0.450945   -0.389847    0.352522
          24
Simulation Time: t =  644.00
   C    -0.541352    3.184971    2.054662
   C    -1.461718    4.015599    1.380962
   C    -1.936948    3.693928    0.083895
   C    -1.564568    2.490038   -0.500614
   C    -0.681564    1.625222    0.202533
   C    -0.104012    2.025593    1.451298
   C     1.559952   -2.493655    0.501308
   C     0.673178   -1.620711   -0.192539
   C     0.118894   -2.010368   -1.463114
   C     0.562857   -3.176396   -2.071757
   C     1.466351   -4.021264   -1.385800
   C     1.930894   -3.703689   -0.081970
   H    -0.134667    3.485513    3.020992
   H    -1.801177    4.916373    1.868642
   H    -2.635059    4.373481   -0.420351
   H    -2.014583    2.150349   -1.437620
   H     0.754289    1.446453    1.840932
   H     2.042632   -2.114464    1.414442
   H    -0.765069   -1.455832   -1.818370
   H     0.109422   -3.510534   -3.010289
   H     1.797428   -4.928833   -1.875639
   H     2.665146   -4.366226    0.384824
   N    -0.466204    0.384964   -0.331043
   N     0.446053   -0.392640    0.351496
          24
Simulation Time: t =  646.00
   C    -0.553856    3.181715    2.066032
   C    -1.466904    4.015212    1.384894
   C    -1.927895    3.703051    0.079644
   C    -1.555022    2.499496   -0.505207
   C    -0.681979    1.628821    0.206941
   C    -0.116732    2.021665    1.464552
   C     1.548494   -2.501331    0.506222
   C     0.674129   -1.626617   -0.196800
   C     0.132665   -2.004669   -1.475250
   C     0.577688   -3.172993   -2.083770
   C     1.471188   -4.019943   -1.388846
   C     1.920978   -3.714204   -0.078658
   H    -0.185695    3.468666    3.043798
   H    -1.813058    4.917039    1.877719
   H    -2.598440    4.391580   -0.426015
   H    -1.977034    2.173265   -1.452651
   H     0.707436    1.420273    1.868377
   H     2.017852   -2.133048    1.429182
   H    -0.724170   -1.435316   -1.844300
   H     0.153131   -3.493627   -3.039813
   H     1.807449   -4.928328   -1.885910
   H     2.631752   -4.381728    0.393144
   N    -0.462041    0.386837   -0.331000
   N     0.441152   -0.395495    0.350979
          24
Simulation Time: t =  648.00
   C    -0.566732    3.178799    2.076965
   C    -1.472049    4.014702    1.388759
   C    -1.918486    3.711872    0.075894
   C    -1.545743    2.509255   -0.509489
   C    -0.682115    1.631476    0.211089
   C    -0.129021    2.017476    1.477589
   C     1.537450   -2.509195    0.510982
   C     0.675017   -1.632046   -0.201236
   C     0.146263   -1.999145   -1.487143
   C     0.592509   -3.169795   -2.095169
   C     1.475869   -4.018367   -1.391958
   C     1.910772   -3.724209   -0.075943
   H    -0.235040    3.453880    3.070925
   H    -1.826371    4.921908    1.887883
   H    -2.564642    4.412017   -0.433711
   H    -1.939956    2.195962   -1.471167
   H     0.658759    1.392977    1.898260
   H     1.992024   -2.153793    1.444911
   H    -0.682480   -1.412512   -1.874055
   H     0.197511   -3.476764   -3.070985
   H     1.818724   -4.931053   -1.896226
   H     2.601120   -4.400120    0.405116
   N    -0.458086    0.389085   -0.331387
   N     0.436325   -0.398543    0.351050
          24
Simulation Time: t =  650.00
   C    -0.580024    3.176202    2.087481
   C    -1.477322    4.014320    1.392494
   C    -1.908598    3.720463    0.072946
   C    -1.536566    2.519143   -0.513394
   C    -0.681919    1.633270    0.215085
   C    -0.141123    2.013017    1.490139
   C     1.526875   -2.517488    0.515573
   C     0.675680   -1.636651   -0.205818
   C     0.159922   -1.993994   -1.498776
   C     0.607274   -3.166627   -2.106046
   C     1.480536   -4.016901   -1.395236
   C     1.900109   -3.733481   -0.073826
   H    -0.282262    3.440933    3.102408
   H    -1.840036    4.928135    1.897542
   H    -2.534944    4.435891   -0.444538
   H    -1.903681    2.218263   -1.493683
   H     0.610198    1.363424    1.931564
   H     1.965313   -2.176217    1.461757
   H    -0.641886   -1.386451   -1.908066
   H     0.242519   -3.459867   -3.102839
   H     1.830358   -4.934452   -1.905152
   H     2.574502   -4.422301    0.421238
   N    -0.454386    0.391753   -0.332227
   N     0.431643   -0.401946    0.351700
          24
Simulation Time: t =  652.00
   C    -0.593760    3.174015    2.097816
   C    -1.482756    4.014311    1.396298
   C    -1.898297    3.728838    0.070715
   C    -1.527385    2.529037   -0.516952
   C    -0.681448    1.634277    0.218849
   C    -0.153146    2.008288    1.502126
   C     1.516761   -2.526289    0.519996
   C     0.676056   -1.640190   -0.210514
   C     0.173759   -1.989239   -1.510116
   C     0.621960   -3.163448   -2.116580
   C     1.485291   -4.015832   -1.398764
   C     1.888994   -3.742015   -0.072243
   H    -0.327638    3.428940    3.135851
   H    -1.852831    4.932780    1.905059
   H    -2.508941    4.462635   -0.458342
   H    -1.867991    2.240512   -1.518927
   H     0.562810    1.331353    1.968519
   H     1.937679   -2.200021    1.479583
   H    -0.602669   -1.357143   -1.946084
   H     0.288264   -3.442657   -3.133701
   H     1.841476   -4.936193   -1.911369
   H     2.551150   -4.447458    0.440722
   N    -0.450970    0.394882   -0.333523
   N     0.427124   -0.405875    0.352910
          24
Simulation Time: t =  654.00
   C    -0.607841    3.172149    2.108294
   C    -1.488484    4.014903    1.400107
   C    -1.887731    3.737260    0.069179
   C    -1.518156    2.538778   -0.520372
   C    -0.680677    1.634624    0.222505
   C    -0.165133    2.003215    1.513509
   C     1.507048   -2.535602    0.524252
   C     0.676134   -1.642553   -0.215266
   C     0.187739   -1.984844   -1.521257
   C     0.636487   -3.160134   -2.126973
   C     1.490241   -4.015371   -1.402547
   C     1.877608   -3.749990   -0.071032
   H    -0.371670    3.416835    3.167615
   H    -1.863898    4.933862    1.909281
   H    -2.485101    4.490072   -0.473675
   H    -1.832190    2.263457   -1.544363
   H     0.516106    1.297656    2.008451
   H     1.909072   -2.225000    1.497994
   H    -0.563570   -1.325840   -1.986935
   H     0.334859   -3.424764   -3.161679
   H     1.851465   -4.934898   -1.914091
   H     2.528954   -4.473118    0.461617
   N    -0.447803    0.398420   -0.335242
   N     0.422726   -0.410393    0.354619
          24
Simulation Time: t =  656.00
   C    -0.622298    3.170616    2.119142
   C    -1.494408    4.016131    1.404100
   C    -1.877104    3.745937    0.068006
   C    -1.508741    2.548178   -0.523762
   C    -0.679728    1.634472    0.225892
   C    -0.177051    1.997669    1.524461
   C     1.497631   -2.545409    0.528269
   C     0.675993   -1.643760   -0.219819
   C     0.201670   -1.980675   -1.532497
   C     0.650915   -3.156635   -2.137296
   C     1.495319   -4.015559   -1.406772
   C     1.866226   -3.757572   -0.069752
   H    -0.414536    3.403828    3.194204
   H    -1.873023    4.930755    1.909950
   H    -2.461397    4.515334   -0.488486
   H    -1.795844    2.287699   -1.567111
   H     0.468768    1.264407    2.049695
   H     1.879387   -2.250968    1.516435
   H    -0.522383   -1.294761   -2.028660
   H     0.382035   -3.406049   -3.185509
   H     1.860212   -4.930561   -1.913352
   H     2.505167   -4.496428    0.481398
   N    -0.444845    0.402338   -0.337282
   N     0.418437   -0.415492    0.356712
          24
Simulation Time: t =  658.00
   C    -0.637011    3.169085    2.130442
   C    -1.500505    4.017995    1.408171
   C    -1.866607    3.755054    0.066958
   C    -1.499098    2.557233   -0.527256
   C    -0.678630    1.633818    0.228969
   C    -0.188839    1.991646    1.535313
   C     1.488311   -2.555541    0.531921
   C     0.675737   -1.644024   -0.224101
   C     0.215403   -1.976481   -1.543980
   C     0.665316   -3.152903   -2.147534
   C     1.500508   -4.016304   -1.411354
   C     1.855092   -3.765055   -0.068213
   H    -0.456242    3.389477    3.213587
   H    -1.880614    4.924515    1.907637
   H    -2.436290    4.535880   -0.500796
   H    -1.758526    2.313666   -1.585002
   H     0.419281    1.234170    2.090083
   H     1.848540   -2.277722    1.534392
   H    -0.476911   -1.266255   -2.069171
   H     0.429224   -3.386629   -3.204851
   H     1.868030   -4.924493   -1.909934
   H     2.477644   -4.515000    0.497814
   N    -0.442052    0.406618   -0.339524
   N     0.414157   -0.421055    0.359127
          24
Simulation Time: t =  660.00
   C    -0.652101    3.167494    2.142041
   C    -1.506530    4.020229    1.412447
   C    -1.856298    3.764620    0.065728
   C    -1.489049    2.565857   -0.530756
   C    -0.677537    1.632889    0.231548
   C    -0.200518    1.985070    1.546323
   C     1.478948   -2.565914    0.535108
   C     0.675460   -1.643518   -0.227967
   C     0.228811   -1.972032   -1.555877
   C     0.679822   -3.148937   -2.157614
   C     1.505683   -4.017427   -1.416246
   C     1.844308   -3.772539   -0.066199
   H    -0.496301    3.373935    3.225528
   H    -1.887691    4.917410    1.903749
   H    -2.409038    4.550422   -0.509495
   H    -1.720569    2.341165   -1.596891
   H     0.366775    1.209113    2.127652
   H     1.816475   -2.305052    1.551259
   H    -0.426061   -1.242253   -2.106590
   H     0.475776   -3.366774   -3.220309
   H     1.875759   -4.918905   -1.905227
   H     2.445633   -4.527780    0.509525
   N    -0.439342    0.411160   -0.341849
   N     0.409836   -0.426948    0.361744
          24
Simulation Time: t =  662.00
   C    -0.667556    3.165532    2.153632
   C    -1.512357    4.022604    1.416803
   C    -1.846146    3.774537    0.064299
   C    -1.478473    2.574081   -0.534138
   C    -0.676497    1.631816    0.233686
   C    -0.212234    1.978098    1.557670
   C     1.469428   -2.576391    0.537823
   C     0.675184   -1.642308   -0.231483
   C     0.241967   -1.967190   -1.568116
   C     0.694489   -3.144659   -2.167477
   C     1.510812   -4.018758   -1.421122
   C     1.833833   -3.780092   -0.063849
   H    -0.534161    3.357784    3.231749
   H    -1.895474    4.912487    1.900034
   H    -2.379926    4.559345   -0.514597
   H    -1.682386    2.369709   -1.603258
   H     0.311309    1.190244    2.161102
   H     1.783082   -2.332824    1.566556
   H    -0.370099   -1.223472   -2.139933
   H     0.521011   -3.346864   -3.233156
   H     1.884263   -4.916173   -1.900805
   H     2.409922   -4.535290    0.516501
   N    -0.436600    0.415828   -0.344246
   N     0.405362   -0.433148    0.364477
          24
Simulation Time: t =  664.00
   C    -0.683462    3.163044    2.164775
   C    -1.517844    4.024891    1.421207
   C    -1.835951    3.784462    0.062710
   C    -1.467245    2.582004   -0.537103
   C    -0.675605    1.630873    0.235504
   C    -0.224204    1.970910    1.569339
   C     1.459634   -2.586822    0.540052
   C     0.674889   -1.640527   -0.234673
   C     0.255040   -1.961909   -1.580527
   C     0.709421   -3.140080   -2.177030
   C     1.515803   -4.020121   -1.425757
   C     1.823477   -3.787627   -0.061375
   H    -0.569247    3.341860    3.235637
   H    -1.904897    4.912303    1.898069
   H    -2.350335    4.564590   -0.517182
   H    -1.644739    2.398359   -1.605852
   H     0.253929    1.177316    2.190099
   H     1.748419   -2.360824    1.579912
   H    -0.310494   -1.209327   -2.169241
   H     0.564338   -3.327318   -3.244985
   H     1.894362   -4.917866   -1.897990
   H     2.372617   -4.539630    0.520016
   N    -0.433676    0.420375   -0.346782
   N     0.400689   -0.439586    0.367223
          24
Simulation Time: t =  666.00
   C    -0.699784    3.159748    2.175071
   C    -1.523025    4.027038    1.425440
   C    -1.825468    3.794007    0.061235
   C    -1.455307    2.589820   -0.539385
   C    -0.674804    1.630093    0.237226
   C    -0.236754    1.963781    1.581181
   C     1.449453   -2.597071    0.541792
   C     0.674580   -1.638407   -0.237689
   C     0.268283   -1.956283   -1.592874
   C     0.724659   -3.135153   -2.186180
   C     1.520671   -4.021522   -1.429943
   C     1.813011   -3.794947   -0.059136
   H    -0.601108    3.327063    3.241031
   H    -1.916209    4.917918    1.898606
   H    -2.322187    4.569127   -0.519161
   H    -1.608359    2.426148   -1.607348
   H     0.196374    1.168899    2.215224
   H     1.712478   -2.388818    1.591305
   H    -0.249522   -1.198001   -2.195547
   H     0.605296   -3.308508   -3.257313
   H     1.906068   -4.924114   -1.897310
   H     2.336521   -4.544120    0.522373
   N    -0.430503    0.424724   -0.349466
   N     0.395787   -0.446096    0.369992
          24
Simulation Time: t =  668.00
   C    -0.716433    3.155415    2.184267
   C    -1.527960    4.029135    1.429446
   C    -1.814485    3.802761    0.059996
   C    -1.442690    2.597810   -0.540789
   C    -0.673997    1.629321    0.238878
   C    -0.250185    1.957067    1.593133
   C     1.438662   -2.606825    0.542943
   C     0.674349   -1.636483   -0.240677
   C     0.281930   -1.950412   -1.604758
   C     0.740371   -3.130026   -2.194844
   C     1.525404   -4.023021   -1.433741
   C     1.802237   -3.801886   -0.057474
   H    -0.629445    3.313940    3.250735
   H    -1.928901    4.928139    1.901403
   H    -2.297392    4.575753   -0.522492
   H    -1.573734    2.452315   -1.610185
   H     0.140666    1.162648    2.237813
   H     1.675480   -2.416416    1.600930
   H    -0.189622   -1.186804   -2.220581
   H     0.643606   -3.290702   -3.270991
   H     1.918655   -4.933517   -1.898423
   H     2.304227   -4.552342    0.526152
   N    -0.427052    0.428878   -0.352154
   N     0.390587   -0.452285    0.372807
          24
Simulation Time: t =  670.00
   C    -0.733454    3.150032    2.192299
   C    -1.532709    4.031380    1.433329
   C    -1.802906    3.810563    0.059071
   C    -1.429287    2.605976   -0.541158
   C    -0.673272    1.628918    0.240704
   C    -0.264703    1.950922    1.604903
   C     1.427161   -2.615938    0.543527
   C     0.674232   -1.634806   -0.243552
   C     0.296166   -1.944516   -1.616038
   C     0.756610   -3.124749   -2.203017
   C     1.530059   -4.024744   -1.437240
   C     1.791065   -3.808330   -0.056621
   H    -0.654260    3.302618    3.265306
   H    -1.941601    4.940348    1.905299
   H    -2.277044    4.586005   -0.528312
   H    -1.541298    2.476291   -1.615659
   H     0.088720    1.156179    2.259329
   H     1.637676   -2.443214    1.609011
   H    -0.132701   -1.173190   -2.246019
   H     0.679184   -3.274030   -3.285862
   H     1.930905   -4.943647   -1.900405
   H     2.277056   -4.566689    0.533124
   N    -0.423163    0.432538   -0.354843
   N     0.384968   -0.458084    0.375540
          24
Simulation Time: t =  672.00
   C    -0.750933    3.143735    2.199278
   C    -1.537310    4.033959    1.437235
   C    -1.790766    3.817522    0.058506
   C    -1.415018    2.614189   -0.540492
   C    -0.672676    1.629135    0.242784
   C    -0.280383    1.945415    1.616278
   C     1.414862   -2.624312    0.543531
   C     0.674276   -1.633397   -0.246188
   C     0.311149   -1.938752   -1.626689
   C     0.773367   -3.119322   -2.210799
   C     1.534693   -4.026849   -1.440612
   C     1.779548   -3.814341   -0.056517
   H    -0.675796    3.292911    3.282998
   H    -1.952879    4.951357    1.908929
   H    -2.261033    4.599581   -0.536430
   H    -1.511072    2.497803   -1.623523
   H     0.041732    1.147615    2.280851
   H     1.599469   -2.468770    1.615760
   H    -0.079855   -1.155862   -2.272551
   H     0.712011   -3.258555   -3.300797
   H     1.941625   -4.951931   -1.902264
   H     2.254583   -4.586985    0.543161
   N    -0.418779    0.435525   -0.357489
   N     0.378847   -0.463488    0.378071
          24
Simulation Time: t =  674.00
   C    -0.768776    3.136592    2.205503
   C    -1.541830    4.037021    1.441265
   C    -1.778202    3.823756    0.058160
   C    -1.399957    2.622495   -0.538985
   C    -0.672078    1.629620    0.244907
   C    -0.297289    1.940630    1.627273
   C     1.401591   -2.631723    0.542957
   C     0.674577   -1.632763   -0.248883
   C     0.326868   -1.932884   -1.636534
   C     0.790791   -3.113926   -2.218271
   C     1.539316   -4.029450   -1.443957
   C     1.767863   -3.820315   -0.057143
   H    -0.694610    3.284421    3.300679
   H    -1.961643    4.958572    1.911307
   H    -2.248011    4.614881   -0.545628
   H    -1.482756    2.516809   -1.632157
   H     0.000019    1.136172    2.302588
   H     1.561103   -2.492718    1.621362
   H    -0.031030   -1.135529   -2.299238
   H     0.742199   -3.244259   -3.314314
   H     1.949854   -4.956586   -1.903281
   H     2.235232   -4.610403    0.554173
   N    -0.413941    0.438045   -0.359836
   N     0.372125   -0.468084    0.380484
          24
Simulation Time: t =  676.00
   C    -0.786986    3.128860    2.211328
   C    -1.546352    4.040665    1.445329
   C    -1.765378    3.829588    0.058118
   C    -1.384130    2.630794   -0.536953
   C    -0.671463    1.630405    0.247364
   C    -0.315377    1.936277    1.637679
   C     1.387368   -2.638252    0.541807
   C     0.675072   -1.632797   -0.251586
   C     0.343268   -1.926705   -1.645746
   C     0.808897   -3.108573   -2.225531
   C     1.543883   -4.032533   -1.447325
   C     1.756183   -3.826574   -0.058168
   H    -0.711432    3.276685    3.315196
   H    -1.967238    4.960886    1.911979
   H    -2.236195    4.629514   -0.553991
   H    -1.456006    2.533285   -1.639243
   H    -0.036553    1.122684    2.323581
   H     1.522820   -2.514708    1.625794
   H     0.014325   -1.114484   -2.323956
   H     0.769885   -3.231136   -3.325124
   H     1.955393   -4.956937   -1.903333
   H     2.216921   -4.632892    0.563200
   N    -0.408611    0.440061   -0.361994
   N     0.364872   -0.472012    0.382722
          24
Simulation Time: t =  678.00
   C    -0.805617    3.120890    2.217083
   C    -1.550888    4.044830    1.449280
   C    -1.752467    3.835385    0.058469
   C    -1.367535    2.638921   -0.534686
   C    -0.670850    1.631600    0.250446
   C    -0.334512    1.931881    1.647313
   C     1.372306   -2.644121    0.540191
   C     0.675588   -1.633155   -0.254238
   C     0.360344   -1.920113   -1.654618
   C     0.827544   -3.103065   -2.232659
   C     1.548375   -4.036037   -1.450603
   C     1.744663   -3.833359   -0.059335
   H    -0.726850    3.269343    3.324146
   H    -1.969732    4.958772    1.911247
   H    -2.223883    4.641073   -0.559673
   H    -1.430560    2.547264   -1.642594
   H    -0.068595    1.109021    2.342002
   H     1.484726   -2.534498    1.628938
   H     0.056874   -1.095378   -2.344313
   H     0.795241   -3.219256   -3.332525
   H     1.958661   -4.953750   -1.902892
   H     2.197874   -4.650985    0.567841
   N    -0.402763    0.441538   -0.364109
   N     0.357207   -0.475543    0.384694
          24
Simulation Time: t =  680.00
   C    -0.824600    3.112801    2.223000
   C    -1.555325    4.049255    1.452929
   C    -1.739639    3.841368    0.059112
   C    -1.350287    2.646969   -0.532456
   C    -0.670058    1.632743    0.253958
   C    -0.354587    1.927153    1.656347
   C     1.356398   -2.649352    0.538166
   C     0.676155   -1.634138   -0.257096
   C     0.378070   -1.912848   -1.663096
   C     0.846807   -3.097540   -2.239630
   C     1.552706   -4.039750   -1.453784
   C     1.733348   -3.840794   -0.060611
   H    -0.741336    3.262082    3.326446
   H    -1.970130    4.954103    1.910173
   H    -2.209900    4.647747   -0.561423
   H    -1.406242    2.558864   -1.640833
   H    -0.096650    1.097277    2.356005
   H     1.447097   -2.551805    1.630590
   H     0.096997   -1.080117   -2.358617
   H     0.818388   -3.208808   -3.336742
   H     1.960407   -4.949044   -1.902909
   H     2.177106   -4.662887    0.567010
   N    -0.396542    0.442825   -0.365904
   N     0.349098   -0.478421    0.386500
          24
Simulation Time: t =  682.00
   C    -0.843994    3.104830    2.229090
   C    -1.559458    4.053551    1.456195
   C    -1.726979    3.847636    0.060005
   C    -1.332431    2.654906   -0.530340
   C    -0.669101    1.633821    0.257806
   C    -0.375423    1.921803    1.664892
   C     1.339743   -2.654178    0.535833
   C     0.676703   -1.635538   -0.260251
   C     0.396516   -1.904950   -1.671202
   C     0.866585   -3.091887   -2.246365
   C     1.556818   -4.043429   -1.456716
   C     1.722214   -3.848753   -0.062044
   H    -0.755162    3.254815    3.322850
   H    -1.969740    4.949768    1.910180
   H    -2.193881    4.649101   -0.559117
   H    -1.382978    2.568185   -1.633893
   H    -0.121256    1.088966    2.364336
   H     1.410222   -2.566426    1.630664
   H     0.134629   -1.069372   -2.366289
   H     0.839526   -3.199992   -3.338863
   H     1.961605   -4.945533   -1.904522
   H     2.154546   -4.668737    0.561125
   N    -0.390008    0.444007   -0.367334
   N     0.340545   -0.480794    0.388107
          24
Simulation Time: t =  684.00
   C    -0.863912    3.097180    2.235154
   C    -1.563096    4.057351    1.459039
   C    -1.714496    3.854225    0.061228
   C    -1.313895    2.662561   -0.528204
   C    -0.668085    1.635060    0.262019
   C    -0.396894    1.915623    1.672882
   C     1.322556   -2.658997    0.533247
   C     0.677033   -1.636918   -0.263535
   C     0.415769   -1.896623   -1.679059
   C     0.886749   -3.086009   -2.252699
   C     1.560609   -4.046810   -1.459381
   C     1.711125   -3.856865   -0.063597
   H    -0.768480    3.247753    3.316065
   H    -1.969852    4.948709    1.912563
   H    -2.176377    4.646240   -0.553704
   H    -1.361035    2.575134   -1.623335
   H    -0.142358    1.084580    2.366756
   H     1.374188   -2.578304    1.629314
   H     0.169499   -1.062423   -2.368011
   H     0.858859   -3.192955   -3.340572
   H     1.963447   -4.945319   -1.908738
   H     2.130963   -4.670343    0.551897
   N    -0.383205    0.445092   -0.368506
   N     0.331699   -0.483009    0.389421
          24
Simulation Time: t =  686.00
   C    -0.884315    3.089895    2.240899
   C    -1.566140    4.060416    1.461497
   C    -1.702112    3.860864    0.062812
   C    -1.294766    2.670037   -0.525868
   C    -0.666992    1.636159    0.266349
   C    -0.418961    1.908687    1.680402
   C     1.304920   -2.664003    0.530347
   C     0.677112   -1.638303   -0.267162
   C     0.435857   -1.888014   -1.686457
   C     0.907251   -3.079814   -2.258446
   C     1.564039   -4.049818   -1.461692
   C     1.699960   -3.864826   -0.065457
   H    -0.781329    3.241367    3.309987
   H    -1.971230    4.952569    1.917984
   H    -2.158526    4.641869   -0.547209
   H    -1.340523    2.579628   -1.611845
   H    -0.159821    1.083159    2.364317
   H     1.338984   -2.587523    1.626942
   H     0.200811   -1.057584   -2.365352
   H     0.876707   -3.187718   -3.343628
   H     1.966297   -4.949454   -1.915751
   H     2.107980   -4.670532    0.541792
   N    -0.376238    0.446413   -0.369408
   N     0.322649   -0.485094    0.390571
          24
Simulation Time: t =  688.00
   C    -0.905139    3.082922    2.246073
   C    -1.568624    4.062734    1.463652
   C    -1.689702    3.867242    0.064834
   C    -1.275153    2.677461   -0.523150
   C    -0.665745    1.636872    0.270654
   C    -0.441598    1.901183    1.687403
   C     1.286928   -2.669374    0.527052
   C     0.676902   -1.639650   -0.271062
   C     0.456795   -1.879364   -1.693308
   C     0.928081   -3.073312   -2.263420
   C     1.567052   -4.052416   -1.463867
   C     1.688557   -3.872261   -0.067647
   H    -0.793840    3.236146    3.308353
   H    -1.973759    4.961073    1.925997
   H    -2.141829    4.639325   -0.542104
   H    -1.321614    2.581636   -1.602389
   H    -0.173263    1.082710    2.359021
   H     1.304697   -2.594217    1.623824
   H     0.227727   -1.052398   -2.360653
   H     0.893454   -3.184166   -3.349042
   H     1.969953   -4.957181   -1.924912
   H     2.087345   -4.672557    0.533581
   N    -0.369265    0.448266   -0.370073
   N     0.313566   -0.487206    0.391644
          24
Simulation Time: t =  690.00
   C    -0.926382    3.076373    2.250562
   C    -1.570622    4.064462    1.465704
   C    -1.677191    3.873165    0.067399
   C    -1.255088    2.684767   -0.519879
   C    -0.664441    1.637304    0.274947
   C    -0.464749    1.893198    1.693626
   C     1.268708   -2.675354    0.523426
   C     0.676323   -1.640641   -0.275090
   C     0.478661   -1.871036   -1.699610
   C     0.949090   -3.066379   -2.267671
   C     1.569704   -4.054728   -1.466091
   C     1.676819   -3.878833   -0.070153
   H    -0.806260    3.232339    3.313255
   H    -1.976383    4.972118    1.935199
   H    -2.127522    4.641185   -0.540373
   H    -1.304218    2.581332   -1.597145
   H    -0.182125    1.080798    2.353272
   H     1.271462   -2.598685    1.620044
   H     0.249605   -1.044183   -2.356482
   H     0.909369   -3.182116   -3.356357
   H     1.973568   -4.966397   -1.934888
   H     2.070285   -4.679137    0.529631
   N    -0.362299    0.450691   -0.370606
   N     0.304555   -0.489631    0.392611
          24
Simulation Time: t =  692.00
   C    -0.947902    3.070122    2.254549
   C    -1.572335    4.065949    1.467671
   C    -1.664570    3.878626    0.070553
   C    -1.234699    2.692029   -0.516140
   C    -0.663007    1.637398    0.279328
   C    -0.488349    1.884888    1.698917
   C     1.250289   -2.681954    0.519523
   C     0.675380   -1.641174   -0.279087
   C     0.501450   -1.863208   -1.705304
   C     0.970242   -3.059076   -2.271329
   C     1.572082   -4.056887   -1.468642
   C     1.664705   -3.884425   -0.072924
   H    -0.818986    3.229768    3.324168
   H    -1.977865    4.982604    1.943824
   H    -2.116000    4.648199   -0.542716
   H    -1.288108    2.579131   -1.596559
   H    -0.186138    1.075477    2.349124
   H     1.239660   -2.601180    1.615597
   H     0.266092   -1.031361   -2.354576
   H     0.924813   -3.181277   -3.364240
   H     1.976060   -4.974599   -1.944098
   H     2.056860   -4.691167    0.530791
   N    -0.355416    0.453721   -0.371043
   N     0.295669   -0.492532    0.393442
          24
Simulation Time: t =  694.00
   C    -0.969575    3.064202    2.258354
   C    -1.573874    4.067440    1.469796
   C    -1.651916    3.883705    0.074054
   C    -1.214090    2.699195   -0.512090
   C    -0.661473    1.637159    0.283628
   C    -0.512309    1.876291    1.703329
   C     1.231745   -2.689242    0.515438
   C     0.674064   -1.641136   -0.283022
   C     0.525092   -1.855864   -1.710416
   C     0.991458   -3.051461   -2.274601
   C     1.574311   -4.059070   -1.471700
   C     1.652298   -3.889116   -0.075781
   H    -0.832634    3.227857    3.338271
   H    -1.977130    4.989826    1.950302
   H    -2.106393    4.659182   -0.548242
   H    -1.272915    2.575646   -1.599213
   H    -0.185629    1.066253    2.347499
   H     1.209461   -2.602016    1.610554
   H     0.277645   -1.014279   -2.355194
   H     0.940142   -3.181290   -3.371143
   H     1.976371   -4.979815   -1.951245
   H     2.045958   -4.707101    0.535903
   N    -0.348634    0.457439   -0.371368
   N     0.286898   -0.495999    0.394152
          24
Simulation Time: t =  696.00
   C    -0.991198    3.058448    2.262399
   C    -1.575377    4.069199    1.472011
   C    -1.639375    3.888678    0.077732
   C    -1.193404    2.706256   -0.508084
   C    -0.659796    1.636511    0.287921
   C    -0.536474    1.867390    1.706971
   C     1.213114   -2.697180    0.511330
   C     0.672369   -1.640521   -0.287034
   C     0.549457   -1.848742   -1.714992
   C     1.012655   -3.043538   -2.277776
   C     1.576519   -4.061409   -1.475140
   C     1.639757   -3.893284   -0.078647
   H    -0.848059    3.225802    3.351860
   H    -1.973699    4.992262    1.953718
   H    -2.097199    4.671551   -0.554858
   H    -1.258090    2.571765   -1.602463
   H    -0.181556    1.054294    2.347915
   H     1.181097   -2.601664    1.605051
   H     0.285174   -0.995225   -2.357140
   H     0.955668   -3.181678   -3.375598
   H     1.974129   -4.981144   -1.955682
   H     2.035717   -4.723648    0.542590
   N    -0.341970    0.461829   -0.371558
   N     0.278200   -0.499995    0.394750
          24
Simulation Time: t =  698.00
   C    -1.012662    3.052869    2.266975
   C    -1.576834    4.071201    1.474538
   C    -1.627074    3.893654    0.081138
   C    -1.172793    2.713218   -0.504379
   C    -0.658028    1.635481    0.291974
   C    -0.560616    1.858092    1.710248
   C     1.194403   -2.705637    0.507275
   C     0.670367   -1.639388   -0.291087
   C     0.574329   -1.841427   -1.719165
   C     1.033809   -3.035486   -2.281063
   C     1.578699   -4.063827   -1.478927
   C     1.627260   -3.897311   -0.081303
   H    -0.865972    3.222891    3.361652
   H    -1.967738    4.990161    1.953992
   H    -2.086552    4.682632   -0.560283
   H    -1.243164    2.568390   -1.603549
   H    -0.175671    1.042000    2.348932
   H     1.154651   -2.600770    1.599301
   H     0.290016   -0.977467   -2.358629
   H     0.971695   -3.181863   -3.376866
   H     1.969589   -4.979045   -1.957510
   H     2.024225   -4.737126    0.548204
   N    -0.335425    0.466891   -0.371631
   N     0.269565   -0.504558    0.395234
          24
Simulation Time: t =  700.00
   C    -1.033815    3.047269    2.272240
   C    -1.578273    4.073350    1.477213
   C    -1.615124    3.898831    0.084137
   C    -1.152352    2.720003   -0.501167
   C    -0.656198    1.634268    0.295893
   C    -0.584540    1.848306    1.713375
   C     1.175645   -2.714566    0.503377
   C     0.668083   -1.637689   -0.295179
   C     0.599502   -1.833569   -1.723194
   C     1.054830   -3.027284   -2.284556
   C     1.580824   -4.066198   -1.482823
   C     1.614970   -3.901575   -0.083597
   H    -0.886748    3.218665    3.365892
   H    -1.960017    4.985434    1.951888
   H    -2.072930    4.690491   -0.562794
   H    -1.227846    2.566278   -1.600607
   H    -0.170091    1.031969    2.348961
   H     1.130114   -2.600018    1.593616
   H     0.293658   -0.964146   -2.358038
   H     0.988423   -3.181286   -3.375303
   H     1.963615   -4.975240   -1.957539
   H     2.010155   -4.744688    0.550671
   N    -0.328944    0.472460   -0.371646
   N     0.260975   -0.509707    0.395572
          24
Simulation Time: t =  702.00
   C    -1.054553    3.041463    2.278113
   C    -1.579639    4.075394    1.480003
   C    -1.603547    3.904190    0.086484
   C    -1.132227    2.726703   -0.498489
   C    -0.654344    1.632964    0.299593
   C    -0.608059    1.838042    1.716750
   C     1.156779   -2.723660    0.499576
   C     0.665660   -1.635631   -0.299117
   C     0.624748   -1.824886   -1.727217
   C     1.075758   -3.019127   -2.288174
   C     1.582745   -4.068185   -1.486761
   C     1.602976   -3.906307   -0.085440
   H    -0.910362    3.212977    3.364827
   H    -1.951815    4.981109    1.948848
   H    -2.055459    4.694374   -0.561634
   H    -1.211944    2.565960   -1.593232
   H    -0.166746    1.026156    2.346904
   H     1.107398   -2.600112    1.588402
   H     0.297275   -0.957169   -2.354612
   H     1.006067   -3.179538   -3.372245
   H     1.957462   -4.972252   -1.957031
   H     1.992935   -4.745279    0.549183
   N    -0.322475    0.478432   -0.371660
   N     0.252407   -0.515432    0.395736
          24
Simulation Time: t =  704.00
   C    -1.074871    3.035404    2.284297
   C    -1.580809    4.076960    1.482892
   C    -1.592282    3.909632    0.088107
   C    -1.112467    2.733262   -0.496171
   C    -0.652574    1.631793    0.302982
   C    -0.631064    1.827356    1.720577
   C     1.137805   -2.732743    0.495879
   C     0.663145   -1.633339   -0.302732
   C     0.649912   -1.815340   -1.731372
   C     1.096567   -3.011061   -2.291799
   C     1.584380   -4.069506   -1.490625
   C     1.591274   -3.911506   -0.086859
   H    -0.936547    3.205959    3.360566
   H    -1.944480    4.980430    1.946460
   H    -2.034337    4.694931   -0.557205
   H    -1.195375    2.567701   -1.582566
   H    -0.166950    1.025256    2.342561
   H     1.086375   -2.601671    1.583870
   H     0.301788   -0.956711   -2.348787
   H     1.024676   -3.176402   -3.369557
   H     1.952178   -4.972547   -1.957299
   H     1.972900   -4.739978    0.544412
   N    -0.315946    0.484696   -0.371739
   N     0.243878   -0.521708    0.395721
          24
Simulation Time: t =  706.00
   C    -1.094705    3.028872    2.290387
   C    -1.581728    4.077859    1.485719
   C    -1.581182    3.914974    0.089187
   C    -1.093154    2.739714   -0.494020
   C    -0.650964    1.630815    0.306080
   C    -0.653558    1.816505    1.724959
   C     1.118709   -2.741562    0.492302
   C     0.660611   -1.631080   -0.306028
   C     0.674882   -1.805028   -1.735546
   C     1.117249   -3.003125   -2.295302
   C     1.585706   -4.069987   -1.494227
   C     1.579798   -3.917045   -0.088166
   H    -0.964999    3.197950    3.356584
   H    -1.939000    4.985423    1.945847
   H    -2.010690    4.694166   -0.551091
   H    -1.177959    2.571536   -1.570994
   H    -0.171093    1.028550    2.336781
   H     1.066941   -2.605193    1.580062
   H     0.307503   -0.961250   -2.342099
   H     1.044266   -3.171796   -3.369057
   H     1.948359   -4.977515   -1.959094
   H     1.951147   -4.731840    0.538372
   N    -0.309249    0.491123   -0.371892
   N     0.235325   -0.528356    0.395524
          24
Simulation Time: t =  708.00
   C    -1.114117    3.021822    2.295931
   C    -1.582343    4.078015    1.488648
   C    -1.570021    3.919800    0.089811
   C    -1.074358    2.746187   -0.491761
   C    -0.649577    1.630019    0.308701
   C    -0.675605    1.805826    1.729971
   C     1.099499   -2.749905    0.488790
   C     0.658149   -1.629193   -0.309027
   C     0.699591   -1.794166   -1.739501
   C     1.137824   -2.995405   -2.298588
   C     1.586750   -4.069622   -1.497564
   C     1.568397   -3.922584   -0.089644
   H    -0.995287    3.189420    3.356694
   H    -1.935420    4.996021    1.947148
   H    -1.986296    4.694950   -0.545570
   H    -1.159592    2.577242   -1.561456
   H    -0.178561    1.034112    2.331299
   H     1.048856   -2.611064    1.576894
   H     0.314048   -0.967981   -2.336839
   H     1.064977   -3.165588   -3.371964
   H     1.945780   -4.986696   -1.962337
   H     1.929310   -4.725117    0.533904
   N    -0.302322    0.497659   -0.372096
   N     0.226711   -0.535168    0.395188
          24
Simulation Time: t =  710.00
   C    -1.133059    3.014111    2.300695
   C    -1.582783    4.077659    1.491462
   C    -1.558623    3.923922    0.090459
   C    -1.056149    2.752692   -0.489214
   C    -0.648441    1.629489    0.311135
   C    -0.697305    1.795626    1.735262
   C     1.080260   -2.757760    0.485371
   C     0.655813   -1.627828   -0.311909
   C     0.724034   -1.783084   -1.742998
   C     1.158216   -2.987781   -2.301660
   C     1.587643   -4.068638   -1.500501
   C     1.556914   -3.927791   -0.091646
   H    -1.027045    3.180627    3.363394
   H    -1.933119    5.009934    1.949523
   H    -1.962574    4.700115   -0.542903
   H    -1.140175    2.584570   -1.556531
   H    -0.188491    1.039060    2.328437
   H     1.031880   -2.619467    1.574185
   H     0.320716   -0.973653   -2.335481
   H     1.086984   -3.157602   -3.378420
   H     1.943639   -4.998041   -1.966131
   H     1.909009   -4.723819    0.533629
   N    -0.295031    0.504110   -0.372338
   N     0.217926   -0.541929    0.394700
          24
Simulation Time: t =  712.00
   C    -1.151541    3.005769    2.304655
   C    -1.583169    4.077066    1.494164
   C    -1.546905    3.927210    0.091352
   C    -1.038590    2.759283   -0.486298
   C    -0.647589    1.629339    0.313564
   C    -0.718706    1.786112    1.740572
   C     1.061043   -2.765085    0.481991
   C     0.653678   -1.627072   -0.314599
   C     0.748222   -1.772060   -1.745896
   C     1.178403   -2.980250   -2.304575
   C     1.588491   -4.067266   -1.503125
   C     1.545234   -3.932409   -0.094283
   H    -1.060162    3.171349    3.376672
   H    -1.930948    5.023803    1.951609
   H    -1.940206    4.711028   -0.544276
   H    -1.119523    2.593476   -1.557365
   H    -0.199833    1.040762    2.330249
   H     1.015765   -2.630407    1.571791
   H     0.326911   -0.975708   -2.339795
   H     1.110425   -3.147650   -3.387405
   H     1.940877   -5.008645   -1.969269
   H     1.890997   -4.730090    0.538743
   N    -0.287290    0.510284   -0.372616
   N     0.208894   -0.548567    0.393974
          24
Simulation Time: t =  714.00
   C    -1.169625    2.997033    2.307941
   C    -1.583562    4.076381    1.496893
   C    -1.534927    3.929835    0.092494
   C    -1.021711    2.765809   -0.483027
   C    -0.647069    1.629799    0.316102
   C    -0.739732    1.777326    1.745677
   C     1.041934   -2.771930    0.478704
   C     0.651776   -1.626858   -0.317112
   C     0.772156   -1.761300   -1.748213
   C     1.198301   -2.972640   -2.307462
   C     1.589428   -4.065815   -1.505442
   C     1.533340   -3.936496   -0.097508
   H    -1.094808    3.160908    3.394088
   H    -1.927821    5.034362    1.952158
   H    -1.918598    4.726802   -0.549037
   H    -1.097257    2.604092   -1.563138
   H    -0.212235    1.037661    2.337846
   H     1.000208   -2.643734    1.569495
   H     0.332791   -0.973218   -2.350121
   H     1.135376   -3.135563   -3.397117
   H     1.936736   -5.015870   -1.970718
   H     1.874880   -4.743136    0.548147
   N    -0.279046    0.515954   -0.372894
   N     0.199522   -0.554989    0.392899
          24
Simulation Time: t =  716.00
   C    -1.187301    2.988016    2.310849
   C    -1.584006    4.075681    1.499643
   C    -1.522854    3.932199    0.093772
   C    -1.005578    2.772127   -0.479630
   C    -0.646841    1.630815    0.318732
   C    -0.760249    1.769225    1.750610
   C     1.022948   -2.778286    0.475470
   C     0.650216   -1.627399   -0.319482
   C     0.795757   -1.750747   -1.750064
   C     1.217902   -2.964990   -2.310440
   C     1.590508   -4.064433   -1.507622
   C     1.521321   -3.940270   -0.101016
   H    -1.131154    3.148483    3.411604
   H    -1.923089    5.039456    1.950472
   H    -1.896319    4.744733   -0.555110
   H    -1.072770    2.616797   -1.571321
   H    -0.226510    1.029855    2.350839
   H     0.984860   -2.659157    1.567157
   H     0.339334   -0.967289   -2.365103
   H     1.162027   -3.121190   -3.405583
   H     1.930777   -5.018188   -1.969995
   H     1.859316   -4.759714    0.558893
   N    -0.270305    0.521075   -0.373022
   N     0.189686   -0.560896    0.391487
          24
Simulation Time: t =  718.00
   C    -1.204697    2.978933    2.313734
   C    -1.584467    4.074883    1.502556
   C    -1.510787    3.934603    0.094889
   C    -0.990230    2.778211   -0.476428
   C    -0.646822    1.632280    0.321298
   C    -0.780029    1.761641    1.755544
   C     1.004150   -2.784137    0.472275
   C     0.649055   -1.628788   -0.321772
   C     0.818847   -1.740236   -1.751620
   C     1.237199   -2.957347   -2.313551
   C     1.591734   -4.063113   -1.509758
   C     1.509304   -3.944096   -0.104486
   H    -1.169250    3.133421    3.425091
   H    -1.916571    5.038540    1.946616
   H    -1.872099    4.761604   -0.560042
   H    -1.045716    2.631836   -1.578530
   H    -0.244170    1.018874    2.367608
   H     0.969280   -2.676284    1.564755
   H     0.348414   -0.960175   -2.382273
   H     1.190480   -3.104520   -3.411393
   H     1.923199   -5.015574   -1.967304
   H     1.842570   -4.775719    0.567417
   N    -0.261127    0.525656   -0.372881
   N     0.179302   -0.566116    0.389747
          24
Simulation Time: t =  720.00
   C    -1.221818    2.969945    2.316946
   C    -1.584932    4.073931    1.505297
   C    -1.498856    3.937460    0.096040
   C    -0.975629    2.783937   -0.473796
   C    -0.647063    1.634145    0.324162
   C    -0.798946    1.754261    1.760315
   C     0.985681   -2.789656    0.469143
   C     0.648164   -1.630730   -0.323842
   C     0.841256   -1.729744   -1.753258
   C     1.256158   -2.949570   -2.316756
   C     1.593077   -4.061728   -1.511864
   C     1.497369   -3.948219   -0.107565
   H    -1.208841    3.115509    3.431650
   H    -1.908985    5.032622    1.941475
   H    -1.845053    4.774982   -0.561921
   H    -1.015741    2.649314   -1.581888
   H    -0.266926    1.006670    2.385934
   H     0.952955   -2.694638    1.562399
   H     0.361989   -0.954102   -2.398937
   H     1.220733   -3.085756   -3.414150
   H     1.914670   -5.009491   -1.963584
   H     1.823205   -4.787829    0.570822
   N    -0.251419    0.529617   -0.372552
   N     0.168427   -0.570765    0.387592
          24
Simulation Time: t =  722.00
   C    -1.238809    2.961302    2.320578
   C    -1.585304    4.072545    1.507776
   C    -1.487065    3.940885    0.097250
   C    -0.961724    2.789298   -0.471858
   C    -0.647553    1.636263    0.327348
   C    -0.816853    1.746821    1.764868
   C     0.967681   -2.794989    0.466021
   C     0.647443   -1.633056   -0.325688
   C     0.862806   -1.719297   -1.755146
   C     1.274806   -2.941613   -2.319880
   C     1.594444   -4.060022   -1.513908
   C     1.485518   -3.952700   -0.110112
   H    -1.249601    3.095001    3.430628
   H    -1.901347    5.024254    1.936526
   H    -1.815062    4.783742   -0.559812
   H    -0.982939    2.668865   -1.579958
   H    -0.296009    0.994984    2.403676
   H     0.935435   -2.713588    1.560314
   H     0.381469   -0.950456   -2.412986
   H     1.252928   -3.065288   -3.414570
   H     1.906127   -5.002488   -1.960253
   H     1.800565   -4.794420    0.567691
   N    -0.241186    0.533055   -0.372056
   N     0.157143   -0.574926    0.385053
          24
Simulation Time: t =  724.00
   C    -1.255691    2.952885    2.324469
   C    -1.585505    4.070465    1.509691
   C    -1.475352    3.944860    0.098691
   C    -0.948540    2.794429   -0.470581
   C    -0.648110    1.638168    0.330794
   C    -0.833747    1.739336    1.769243
   C     0.950224   -2.800163    0.462855
   C     0.646876   -1.635792   -0.327609
   C     0.883434   -1.708937   -1.757113
   C     1.293126   -2.933482   -2.322665
   C     1.595765   -4.057785   -1.515748
   C     1.473740   -3.957486   -0.112320
   H    -1.291094    3.072549    3.423733
   H    -1.894852    5.016597    1.933463
   H    -1.782520    4.788373   -0.553986
   H    -0.947482    2.689842   -1.573250
   H    -0.331937    0.984653    2.419348
   H     0.916087   -2.732545    1.558620
   H     0.407465   -0.949246   -2.423278
   H     1.287042   -3.043757   -3.414196
   H     1.898775   -4.997321   -1.958808
   H     1.774794   -4.795992    0.558281
   N    -0.230581    0.536287   -0.371295
   N     0.145488   -0.578533    0.382283
          24
Simulation Time: t =  726.00
   C    -1.272576    2.944862    2.328173
   C    -1.585434    4.067314    1.511110
   C    -1.463630    3.949244    0.100479
   C    -0.935992    2.799216   -0.469623
   C    -0.648689    1.639869    0.334345
   C    -0.849643    1.731817    1.773336
   C     0.933405   -2.805385    0.459627
   C     0.646354   -1.638671   -0.329607
   C     0.903178   -1.698887   -1.759037
   C     1.311167   -2.925177   -2.324858
   C     1.596983   -4.054855   -1.517423
   C     1.461885   -3.962233   -0.114353
   H    -1.333048    3.049013    3.414553
   H    -1.890426    5.012330    1.933645
   H    -1.748359    4.790678   -0.545725
   H    -0.909622    2.711469   -1.563796
   H    -0.374420    0.975401    2.432347
   H     0.894628   -2.750775    1.557139
   H     0.439344   -0.949167   -2.429915
   H     1.323059   -3.021852   -3.414704
   H     1.893335   -4.995860   -1.960320
   H     1.746902   -4.794987    0.544447
   N    -0.219688    0.539395   -0.370202
   N     0.133551   -0.581672    0.379243
          24
Simulation Time: t =  728.00
   C    -1.289485    2.937247    2.331216
   C    -1.585084    4.062991    1.512104
   C    -1.451807    3.953829    0.102797
   C    -0.924018    2.803570   -0.468585
   C    -0.649252    1.641484    0.337982
   C    -0.864624    1.724377    1.776988
   C     0.917304   -2.810817    0.456430
   C     0.645778   -1.641238   -0.331628
   C     0.922197   -1.689485   -1.760752
   C     1.328868   -2.916525   -2.326347
   C     1.598106   -4.051277   -1.518823
   C     1.449818   -3.966601   -0.116604
   H    -1.375476    3.025299    3.407337
   H    -1.888382    5.012299    1.937527
   H    -1.713649    4.793424   -0.536979
   H    -0.869422    2.732976   -1.554466
   H    -0.422438    0.966047    2.442881
   H     0.870658   -2.767815    1.555431
   H     0.475923   -0.947853   -2.433959
   H     1.360907   -3.000218   -3.416879
   H     1.890098   -4.998278   -1.964942
   H     1.718274   -4.795220    0.529246
   N    -0.208581    0.542381   -0.368799
   N     0.121396   -0.584633    0.375780
          24
Simulation Time: t =  730.00
   C    -1.306410    2.929978    2.333284
   C    -1.584524    4.057638    1.512846
   C    -1.439774    3.958358    0.105727
   C    -0.912622    2.807496   -0.467150
   C    -0.649703    1.642981    0.341584
   C    -0.878802    1.717216    1.780089
   C     0.901941   -2.816460    0.453266
   C     0.645147   -1.643421   -0.333561
   C     0.940602   -1.680983   -1.762025
   C     1.346278   -2.907648   -2.327086
   C     1.599156   -4.047110   -1.520238
   C     1.437412   -3.970244   -0.119244
   H    -1.418543    3.002173    3.405295
   H    -1.888336    5.015191    1.944479
   H    -1.679402    4.799477   -0.529700
   H    -0.826906    2.753762   -1.547803
   H    -0.474626    0.954721    2.451767
   H     0.843950   -2.783245    1.552868
   H     0.515586   -0.942533   -2.437088
   H     1.400703   -2.979213   -3.420514
   H     1.888654   -5.002878   -1.971929
   H     1.690124   -4.800466    0.515756
   N    -0.197333    0.545248   -0.366973
   N     0.109038   -0.587446    0.371777
          24
Simulation Time: t =  732.00
   C    -1.323364    2.922976    2.334326
   C    -1.583864    4.051607    1.513591
   C    -1.427437    3.962619    0.109245
   C    -0.901780    2.811022   -0.465140
   C    -0.649909    1.644215    0.344997
   C    -0.892303    1.710527    1.782474
   C     0.887315   -2.822326    0.450172
   C     0.644411   -1.645152   -0.335480
   C     0.958547   -1.673583   -1.762671
   C     1.363383   -2.898524   -2.327134
   C     1.600221   -4.042596   -1.521846
   C     1.424641   -3.973049   -0.122415
   H    -1.462382    2.980199    3.409253
   H    -1.889431    5.018071    1.953130
   H    -1.646348    4.810697   -0.525055
   H    -0.782012    2.773389   -1.544961
   H    -0.529555    0.939447    2.459962
   H     0.814263   -2.796819    1.549094
   H     0.557056   -0.930851   -2.440688
   H     1.442194   -2.959158   -3.424485
   H     1.888336   -5.006901   -1.979958
   H     1.663054   -4.812999    0.505888
   N    -0.186120    0.548094   -0.364638
   N     0.096545   -0.590101    0.367258
          24
Simulation Time: t =  734.00
   C    -1.340291    2.915983    2.334572
   C    -1.583256    4.045403    1.514400
   C    -1.414790    3.966598    0.113317
   C    -0.891461    2.814267   -0.462620
   C    -0.649764    1.644937    0.348197
   C    -0.905266    1.704467    1.784088
   C     0.873382   -2.828253    0.447121
   C     0.643567   -1.646426   -0.337353
   C     0.976004   -1.667317   -1.762523
   C     1.380258   -2.889281   -2.326634
   C     1.601362   -4.037929   -1.523886
   C     1.411540   -3.975121   -0.126093
   H    -1.506791    2.959766    3.417287
   H    -1.890730    5.017776    1.961859
   H    -1.614537    4.827074   -0.522769
   H    -0.735020    2.791544   -1.545165
   H    -0.586183    0.919106    2.467869
   H     0.781477   -2.808400    1.543980
   H     0.599717   -0.911753   -2.445251
   H     1.485289   -2.940192   -3.427173
   H     1.888382   -5.007594   -1.987661
   H     1.636945   -4.832486    0.499648
   N    -0.175052    0.551117   -0.361822
   N     0.084015   -0.592758    0.362293
          24
Simulation Time: t =  736.00
   C    -1.357267    2.909006    2.334368
   C    -1.582832    4.039340    1.515533
   C    -1.401811    3.970387    0.117692
   C    -0.881523    2.817201   -0.459680
   C    -0.649297    1.645216    0.351206
   C    -0.917749    1.698952    1.784811
   C     0.860077   -2.834156    0.444131
   C     0.642538   -1.647052   -0.339148
   C     0.992919   -1.662065   -1.761573
   C     1.396975   -2.879945   -2.325768
   C     1.602617   -4.033289   -1.526407
   C     1.398212   -3.976800   -0.130190
   H    -1.551069    2.941159    3.425686
   H    -1.891517    5.012079    1.969408
   H    -1.583658    4.846643   -0.521248
   H    -0.686826    2.807901   -1.546018
   H    -0.644004    0.893942    2.474868
   H     0.745665   -2.817996    1.537772
   H     0.643761   -0.885987   -2.449885
   H     1.529523   -2.922496   -3.427071
   H     1.888329   -5.003172   -1.994075
   H     1.611111   -4.856138    0.495300
   N    -0.164142    0.554402   -0.358666
   N     0.071554   -0.595663    0.356938
          24
Simulation Time: t =  738.00
   C    -1.374285    2.901823    2.334100
   C    -1.582670    4.033718    1.516924
   C    -1.388561    3.974245    0.122243
   C    -0.871846    2.819851   -0.456569
   C    -0.648497    1.644919    0.354113
   C    -0.929797    1.693866    1.784659
   C     0.847298   -2.839900    0.441188
   C     0.641257   -1.646929   -0.340915
   C     1.009197   -1.657535   -1.759805
   C     1.413626   -2.870558   -2.324719
   C     1.604007   -4.028776   -1.529358
   C     1.384767   -3.978544   -0.134585
   H    -1.594442    2.924573    3.430506
   H    -1.891638    5.000312    1.975163
   H    -1.553157    4.866435   -0.518239
   H    -0.638400    2.822245   -1.544446
   H    -0.702830    0.865592    2.479371
   H     0.707310   -2.825625    1.530867
   H     0.689750   -0.855880   -2.452611
   H     1.574347   -2.906176   -3.423255
   H     1.888171   -4.993271   -1.998882
   H     1.584686   -4.879911    0.490258
   N    -0.153420    0.558154   -0.355276
   N     0.059251   -0.599057    0.351287
          24
Simulation Time: t =  740.00
   C    -1.391415    2.894384    2.333981
   C    -1.582816    4.028530    1.518734
   C    -1.375010    3.978283    0.126618
   C    -0.862301    2.822269   -0.453415
   C    -0.647299    1.644072    0.356772
   C    -0.941439    1.688975    1.783876
   C     0.834882   -2.845208    0.438226
   C     0.639776   -1.646224   -0.342680
   C     1.024708   -1.653251   -1.757215
   C     1.430333   -2.861349   -2.323566
   C     1.605491   -4.024284   -1.532653
   C     1.371321   -3.980783   -0.139243
   H    -1.636072    2.910206    3.428966
   H    -1.891277    4.983655    1.979310
   H    -1.522608    4.883624   -0.511704
   H    -0.591042    2.834323   -1.537867
   H    -0.762690    0.836627    2.479150
   H     0.666755   -2.831572    1.523615
   H     0.738461   -0.824543   -2.451001
   H     1.619249   -2.891265   -3.415585
   H     1.888294   -4.979086   -2.002484
   H     1.557059   -4.900005    0.482312
   N    -0.142975    0.562467   -0.351683
   N     0.047152   -0.602980    0.345414
          24
Simulation Time: t =  742.00
   C    -1.408647    2.886549    2.334074
   C    -1.583232    4.023726    1.520751
   C    -1.361203    3.982660    0.130839
   C    -0.852749    2.824439   -0.450299
   C    -0.645656    1.642712    0.359207
   C    -0.952732    1.684042    1.782567
   C     0.822705   -2.849957    0.435193
   C     0.638122   -1.645060   -0.344534
   C     1.039430   -1.648815   -1.753844
   C     1.447143   -2.852324   -2.322329
   C     1.607020   -4.019709   -1.536069
   C     1.357939   -3.983849   -0.144139
   H    -1.675440    2.898148    3.420135
   H    -1.891275    4.964754    1.982751
   H    -1.491855    4.896421   -0.500481
   H    -0.545626    2.844049   -1.524920
   H    -0.823306    0.809565    2.472248
   H     0.624616   -2.836095    1.516253
   H     0.790062   -0.794987   -2.443025
   H     1.663849   -2.877689   -3.404891
   H     1.889464   -4.963048   -2.005880
   H     1.527929   -4.913821    0.470054
   N    -0.132931    0.567274   -0.347824
   N     0.035306   -0.607312    0.339314
          24
Simulation Time: t =  744.00
   C    -1.425965    2.878300    2.334233
   C    -1.583865    4.019059    1.522992
   C    -1.347086    3.987277    0.134782
   C    -0.843118    2.826435   -0.447133
   C    -0.643520    1.640965    0.361246
   C    -0.963775    1.678889    1.780966
   C     0.810639   -2.853926    0.431969
   C     0.636389   -1.643714   -0.346390
   C     1.053329   -1.643849   -1.749723
   C     1.464120   -2.843669   -2.320864
   C     1.608522   -4.014797   -1.539510
   C     1.344634   -3.987849   -0.149276
   H    -1.712469    2.888347    3.405086
   H    -1.892679    4.947180    1.986806
   H    -1.461029    4.904537   -0.484601
   H    -0.502893    2.851384   -1.505881
   H    -0.884049    0.786263    2.457578
   H     0.581421   -2.839589    1.508652
   H     0.844436   -0.769377   -2.427568
   H     1.707970   -2.865301   -3.392798
   H     1.892503   -4.948108   -2.010348
   H     1.497477   -4.920545    0.453324
   N    -0.123364    0.572451   -0.343594
   N     0.023722   -0.611920    0.332901
          24
Simulation Time: t =  746.00
   C    -1.443306    2.869633    2.334160
   C    -1.584625    4.014349    1.525299
   C    -1.332664    3.992001    0.138651
   C    -0.833334    2.828210   -0.443732
   C    -0.641019    1.639114    0.362961
   C    -0.974643    1.673401    1.779059
   C     0.798604   -2.857084    0.428488
   C     0.634605   -1.642314   -0.348202
   C     1.066489   -1.638214   -1.744882
   C     1.481257   -2.835309   -2.319060
   C     1.609950   -4.009414   -1.542770
   C     1.331362   -3.992690   -0.154738
   H    -1.747786    2.880566    3.386656
   H    -1.896482    4.934131    1.992691
   H    -1.430492    4.909206   -0.465298
   H    -0.462834    2.856502   -1.482525
   H    -0.943916    0.767405    2.435204
   H     0.537982   -2.842424    1.500445
   H     0.900874   -0.748500   -2.404739
   H     1.751524   -2.853939   -3.380941
   H     1.898122   -4.936742   -2.016882
   H     1.466043   -4.921443    0.433191
   N    -0.114213    0.577694   -0.338965
   N     0.012365   -0.616648    0.326063
          24
Simulation Time: t =  748.00
   C    -1.460583    2.860652    2.333440
   C    -1.585480    4.009436    1.527717
   C    -1.317887    3.996567    0.142612
   C    -0.823375    2.829736   -0.439811
   C    -0.638240    1.637402    0.364316
   C    -0.985468    1.667567    1.776830
   C     0.786538   -2.859447    0.424702
   C     0.632805   -1.641001   -0.349810
   C     1.079052   -1.631968   -1.739364
   C     1.498534   -2.827202   -2.316818
   C     1.611282   -4.003506   -1.545867
   C     1.318014   -3.997984   -0.160562
   H    -1.782222    2.874527    3.368895
   H    -1.903235    4.927278    2.000908
   H    -1.400620    4.912882   -0.444624
   H    -0.425200    2.859617   -1.457911
   H    -1.001926    0.752367    2.406386
   H     0.494839   -2.845129    1.490919
   H     0.958501   -0.731576   -2.375985
   H     1.794512   -2.843277   -3.370488
   H     1.906494   -4.929845   -2.025776
   H     1.434332   -4.919692    0.411960
   N    -0.105410    0.582843   -0.333980
   N     0.001233   -0.621460    0.318767
          24
Simulation Time: t =  750.00
   C    -1.477674    2.851306    2.331718
   C    -1.586458    4.004437    1.530250
   C    -1.302752    4.000649    0.146882
   C    -0.813253    2.831110   -0.435136
   C    -0.635233    1.635895    0.365340
   C    -0.996381    1.661533    1.774271
   C     0.774376   -2.860987    0.420595
   C     0.631049   -1.640003   -0.351314
   C     1.091135   -1.625329   -1.733041
   C     1.515948   -2.819225   -2.314146
   C     1.612540   -3.997235   -1.548730
   C     1.304524   -4.003306   -0.167013
   H    -1.816859    2.869804    3.355633
   H    -1.912510    4.925943    2.010874
   H    -1.371691    4.918489   -0.424926
   H    -0.389231    2.861072   -1.435373
   H    -1.057320    0.739373    2.373183
   H     0.452736   -2.848177    1.479460
   H     1.016199   -0.716457   -2.343655
   H     1.836817   -2.833000   -3.361673
   H     1.917238   -4.926463   -2.036290
   H     1.402959   -4.919660    0.392543
   N    -0.096926    0.587804   -0.328795
   N    -0.009711   -0.626207    0.311224
          24
Simulation Time: t =  752.00
   C    -1.494506    2.841672    2.328830
   C    -1.587630    3.999559    1.532973
   C    -1.287266    4.004011    0.151674
   C    -0.802946    2.832411   -0.429582
   C    -0.632022    1.634625    0.366127
   C    -1.007526    1.655408    1.771249
   C     0.762113   -2.861865    0.416111
   C     0.629362   -1.639524   -0.352760
   C     1.102901   -1.618562   -1.725890
   C     1.533488   -2.811278   -2.311066
   C     1.613822   -3.990889   -1.551547
   C     1.290758   -4.008102   -0.174104
   H    -1.852210    2.865925    3.348919
   H    -1.923300    4.927613    2.021086
   H    -1.343823    4.928185   -0.408035
   H    -0.354439    2.861195   -1.417493
   H    -1.109530    0.726204    2.338125
   H     0.412054   -2.851940    1.465671
   H     1.073250   -0.700477   -2.310352
   H     1.878166   -2.822747   -3.354086
   H     1.929446   -4.924199   -2.047008
   H     1.372452   -4.925246    0.377376
   N    -0.088787    0.592582   -0.323627
   N    -0.020459   -0.630780    0.303732
          24
Simulation Time: t =  754.00
   C    -1.511116    2.831774    2.324942
   C    -1.589072    3.995158    1.535855
   C    -1.271484    4.006629    0.157183
   C    -0.792381    2.833748   -0.423232
   C    -0.628676    1.633621    0.366894
   C    -1.018958    1.649284    1.767581
   C     0.749778   -2.862331    0.411207
   C     0.627744   -1.639515   -0.354233
   C     1.114492   -1.611953   -1.717919
   C     1.551126   -2.803070   -2.307672
   C     1.615209   -3.984891   -1.554289
   C     1.276658   -4.012099   -0.181869
   H    -1.887958    2.862207    3.347990
   H    -1.934340    4.928964    2.029742
   H    -1.316975    4.942253   -0.394660
   H    -0.320795    2.860362   -1.405085
   H    -1.158294    0.710721    2.303514
   H     0.373177   -2.856649    1.449795
   H     1.129059   -0.681467   -2.278083
   H     1.918193   -2.812229   -3.346769
   H     1.942089   -4.920406   -2.056318
   H     1.342887   -4.937993    0.367295
   N    -0.080915    0.597065   -0.318659
   N    -0.031063   -0.635120    0.296447
          24
Simulation Time: t =  756.00
   C    -1.527638    2.821727    2.320412
   C    -1.590834    3.991517    1.538878
   C    -1.255484    4.008705    0.163511
   C    -0.781439    2.835158   -0.416345
   C    -0.625420    1.633026    0.367912
   C    -1.030646    1.643092    1.763091
   C     0.737383   -2.862660    0.405822
   C     0.626209   -1.639948   -0.355634
   C     1.126044   -1.605557   -1.709263
   C     1.568848   -2.794515   -2.304024
   C     1.616776   -3.979497   -1.557069
   C     1.262176   -4.015231   -0.190104
   H    -1.923041    2.857925    3.349725
   H    -1.944471    4.927303    2.035385
   H    -1.290989    4.958879   -0.384206
   H    -0.289122    2.858924   -1.397169
   H    -1.203260    0.692037    2.270851
   H     0.336171   -2.862420    1.432298
   H     1.183212   -0.658970   -2.247711
   H     1.956560   -2.801174   -3.338700
   H     1.954261   -4.913109   -2.063002
   H     1.314190   -4.956203    0.361147
   N    -0.073118    0.600951   -0.313931
   N    -0.041600   -0.639080    0.289288
          24
Simulation Time: t =  758.00
   C    -1.544277    2.811754    2.315608
   C    -1.592918    3.988698    1.542060
   C    -1.239348    4.010581    0.170628
   C    -0.769920    2.836629   -0.409225
   C    -0.622272    1.632941    0.369169
   C    -1.042581    1.636634    1.757783
   C     0.724931   -2.863125    0.399921
   C     0.624770   -1.640768   -0.356976
   C     1.137735   -1.599327   -1.700132
   C     1.586626   -2.785354   -2.300202
   C     1.618553   -3.974954   -1.559790
   C     1.247315   -4.017747   -0.198611
   H    -1.955962    2.852324    3.350239
   H    -1.953065    4.921201    2.037318
   H    -1.265763    4.974851   -0.375263
   H    -0.260793    2.857204   -1.391493
   H    -1.244068    0.670698    2.240715
   H     0.301219   -2.869265    1.414115
   H     1.235066   -0.634428   -2.218888
   H     1.992809   -2.789367   -3.328936
   H     1.965557   -4.901641   -2.066501
   H     1.286135   -4.975826    0.356424
   N    -0.065440    0.603959   -0.309330
   N    -0.052090   -0.642395    0.282137
          24
Simulation Time: t =  760.00
   C    -1.561133    2.801974    2.310769
   C    -1.595292    3.986573    1.545451
   C    -1.223151    4.012591    0.178358
   C    -0.757646    2.838162   -0.402122
   C    -0.619117    1.633379    0.370528
   C    -1.054867    1.629726    1.751865
   C     0.712411   -2.863829    0.393436
   C     0.623454   -1.642212   -0.358209
   C     1.149718   -1.592993   -1.690771
   C     1.604463   -2.775686   -2.296142
   C     1.620557   -3.971174   -1.562567
   C     1.232067   -4.019940   -0.207103
   H    -1.985502    2.844805    3.346398
   H    -1.960041    4.910945    2.035772
   H    -1.241149    4.986976   -0.366265
   H    -0.237038    2.855515   -1.385715
   H    -1.280414    0.648618    2.212738
   H     0.268129   -2.877212    1.396030
   H     1.283996   -0.610613   -2.190570
   H     2.026782   -2.776546   -3.317112
   H     1.976021   -4.886804   -2.067084
   H     1.258610   -4.992282    0.350398
[truncated: 651,096 more chars]
